# Supplementary material for: Single-cell analysis of the ventricular-subventricular zone reveals signatures of dorsal and ventral adult neurogenic lineages
Source: bioRxiv preprint, doi:10.1101/2021.02.10.430525, version 2 (2021-02-16)
Supplement: Supplementary Table 1 [file 430525_file02.xlsx]

## Sheet: Astrocytes Markers
genes
Clmn
Atp13a4
Eps8
Pcdh7
Syne1
Tril
Gabbr2
Kcnma1
Fam20a
Celrr
Kirrel3
Dbx2
Grin2c
Timp4
Cxcl14
Fat3
Fgf1
Phactr3
Fry
Daam2
Hapln1
Car2
Mical2
Rasgrf1
Shisa9
Omg
Cd38
Mfhas1
Chst10
Dpf3
S100b
Npas2
Usp54
Cdh20
Hsd11b1
Arhgef28
Ablim1
Mgat4c
Kank1
Robo1
Zbtb16
Gpam
Rn7sk
2210408F21Rik
Vegfa
Nkx2-2os
Gm12239
4930488L21Rik
AI464131
Itga6
Eya1
Mfsd2a
Galnt18
Ccdc85a
Nrp1
Slc9a9
Agt
Frmpd1
Slc14a1
Rapgef3
Ccdc141
Smim3
Chst1
Dzip1l
Vav3
Prex1
Atp13a5
Folh1
St6galnac5
Abcd2
Stambpl1
Papss2
Adamts20
Cyp4f14
Shroom4
Hif3a
Pip4k2a
Itih5
Kcnn3
Tmem176a
Tmem44
Tmem229a
Nat8f3
Frem2
Aass
Slc13a5
Psd2
Gcnt4
Aox1
Lifr
Glrb
Etv4
Fam228a
Rreb1
Il33
Esrrg
RP23-123J19.1
Cpeb3
Vps13d
Myrip
B3galt2
Slc6a9
Pfkp
Grip1
Chst11
Ephb3
Gm43477
Gm45881
Gm6277
Mamdc2
Gm20713
Arxes1
Shroom2
Rarres1
Fam171a1
Asic2
Emx2os
Cnnm2
Gmpr
Wnt7a
Baalc
Tenm4
Hrh1
Cecr5
Nphp3
Gm44257
Nat8f6
Ece1
Smurf1
Arxes2
Gm5089
Brinp3
Cdh19
Sec14l2
Plekha7
Pcdh1
Slc35a3
Arfgef2
Sema4d
Srgap1
Caskin1
Slc30a10
Ttpa
Rgs7bp
Fam184b
Cds2
Rasa3
Sgms1
Gm26618
Mitf
Clip1
Gpr146
Pcsk6
Agmo
Gatsl3
Rbms1
Ctif
Hhatl
Stat5b
Ksr1
Dlg5
Kcna2
Etv5
Parp8
Gatm
Lace1
Gm11266
Otud7a
Gpr37
Abhd1
Tmem56
Tlr3
Eogt
Fam198a
Grin2b
Nfasc
Myh14
Snx29
Tmc7
Npc1
Skap2
Snhg20
Gm28175
Entpd1
Ak4
Fam222b
Ralgapb
Drp2
Unc13c
Adrb1
Src
Notch3
Cntn1
Inf2
Sema4b
Cep350
Zzef1
Ldlrad4
Serpina3n
Kifc3
Lcat
Rbms3
Sntg1
Sfmbt2
Tns1
Abhd18
Arhgap42
Dopey2
Gltscr1
Hip1
Fggy
Flrt1
Olfml1
Snx32
Phf21b
Gabra4
Snph
Fam234a
Scn8a
Gm37885
Cryab
Dopey1
Gm9801
Plekha1
Slc12a9
Dhtkd1
Cacng8
Ranbp3l
Prdm5
Gm2115
Grhl1
Tox2
Rcan2
Ppp3cc
Prkaa2
Edem3
Akap10
Epdr1
Btbd3
Tbc1d10a
Ednra
Depdc5
Sgk3
6430573F11Rik
RP24-165I13.1
Tmem241
Tbck
Cyp4f13
Elmo2
Firre
Wnt7b
Bmp1
Cap2
Sned1
Garem2
Lypd6
Antxr1
Lair1
Nat8l
Cipc
Ntrk3
Fer
Pde9a
Trib2
Stk38l
Ppara
Als2cl
Adra1a
Vps13c
C2cd5
Slc12a4
Gsap
BC067074
Sema4a
Epn2
Ikzf2
Reck
Iqsec2
Fam234b
Caskin2
Ptar1
Arhgef9
Gm16759
Parg
Mink1
Elovl2
Lrch1
Dner
Snx25
Pld1
Kif1c
Wfs1
Tmem260
Atxn7l1
Dusp22
Rhobtb2
Pign
Rgs12
Pcyt1b
Wipf1
Fzd4
Disp1
Zfp236
Hdac7
Itpkb
Stard8
Fyco1
Xkr6
Paqr4
Ttyh2
Slc38a6
Adck1
Col23a1
Slc33a1
Zfp641
Zfp951
Scap
Abca3
Slc35e4
Dock9
Shc3
St3gal3
Afap1l2
Abcc4
Rarb
Mb21d2
Zswim5
4732471J01Rik
Acss2
Kcnq3
Ppip5k1
A230057D06Rik.2
Mid2
Vps8
Gm45846
Cul9
Stxbp5
Gabra2
Sfi1
Fam189a2
Hbegf
Alms1
Slc30a1
Plekhm2
Snx14
Mpv17l
Pxmp4
Kif16b
Gys1
Zc3h7a
A330076H08Rik
Ercc6l2
Slc43a2
Ppm1h
Abcb9
S100pbp
Ankrd29
Ddi2
Gm38393
Cd46
Abca2
Pde1c
9130011E15Rik
Prkdc
Slc38a9
Pced1b
1110019D14Rik
Prr5
Creb3l2
Arhgef18
RP23-331E5.5
Lrrc8c
Rai1
Pknox2
Farp2
Zfp827
Atp2b2
Slc16a6
Pikfyve
Arhgef19
Mkl1
6820431F20Rik
Ttc23
Zfyve1
D630003M21Rik
Celsr2
Stim1
Baz2a
Nos1ap
Esrra
Amotl1
Ago4
Lrrk2
Gm15800
Arhgap18
E2f3
Cep128
Nat8f4
Wbp1l
Zmym6
Asb8
Kansl3
Spopl
Nxpe3
Fam13a
Pigk
Exd1
Ccdc88c
Zfp783
Cpped1
Gm12353
Kif3c
Dmxl2
Zmat1
Ccdc62
Urgcp
Usp40
Mapk9
Tango2
Pamr1
1500017E21Rik
Mtm1
Dcaf5
Grm5
Gm10125
Cpne2
Tmem110
Tagln3
Sestd1
Scrn1
Ikbkb
Ttc7b
Trp53inp1
Pfkfb4
Kctd1
Fam227a
Lrig2
Rab40c
Gigyf1
Uggt1
Anapc1
Tspan14
Nsmaf
Bicd2
Ttc37
Tesk2
Zbtb7c
Colgalt2
Rps6kc1
Usf3
Car8
2610037D02Rik
Grin3a
Cr1l
Slc25a18
Hopx
Fam193b
Prickle1
Fam188a
Invs
Acp2
Usp45
Papd4
Map3k7
Sipa1l3
Gfm2
Mtx3
Ptprj
Orc3
Rpgrip1l
Senp1
Nrg2
Zcwpw2
Ppp1r21
Dhcr7
Tfcp2
Mtmr10
Abtb2
Fbxo42
Mpp6
Uvrag
Klhl32
Otud5
Gm1976
Wdr37
4932443I19Rik
Zbtb37
Amph
Gm26691
A730081D07Rik
Strada
Trak2
Kcnd3
Hlcs
Tet1
Ipo8
Gtf2ird1
Fign
Spats2l
Rnf157
Aco1
Cramp1l
Vps50
Kcnd2
Git2
Dcbld2
Ccdc66
Gon4l
Fancl
Dcp1b
Fam126b
Cdc42bpb
Pkd1
Adam17
Rhbdd1
Hace1
Tubgcp5
Unc79
A230057D06Rik
Chn1
Enpp2
Ccdc82
Sfmbt1
Uggt2
Rnf214
Snhg14
Apex2
Golga1
Prkca
Boc
Cobll1
Eya3
St7l
Sorbs2
Scfd2
Upp2
Hgf
Atp2b4
Dlg2.1
Erc2
Myo5a
Lrpprc
Jakmip2
Lmo1
Ispd
Tbc1d32
Zfp652

## Sheet: Astrocytes GO terms
go	ref	obs	expected	pos.neg	fold.enrich	raw.p.value	fdr
negative regulation of citrulline biosynthetic process (GO:1903249)	1	1	0.02	+	44.51	0.0435	0.756
regulation of citrulline biosynthetic process (GO:1903248)	1	1	0.02	+	44.51	0.0435	0.755
positive regulation of the force of heart contraction by norepinephrine (GO:0003061)	1	1	0.02	+	44.51	0.0435	0.754
regulation of systemic arterial blood pressure by aortic arch baroreceptor feedback (GO:0003026)	1	1	0.02	+	44.51	0.0435	0.753
positive regulation of cellular defense response (GO:0010186)	1	1	0.02	+	44.51	0.0435	0.752
regulation of cellular defense response (GO:0010185)	1	1	0.02	+	44.51	0.0435	0.751
basophil chemotaxis (GO:0002575)	1	1	0.02	+	44.51	0.0435	0.751
determination of stomach left/right asymmetry (GO:0071909)	1	1	0.02	+	44.51	0.0435	0.75
determination of intestine left/right asymmetry (GO:0071908)	1	1	0.02	+	44.51	0.0435	0.749
negative regulation of thioredoxin peroxidase activity by peptidyl-threonine phosphorylation (GO:1903125)	1	1	0.02	+	44.51	0.0435	0.748
negative regulation of thioredoxin peroxidase activity (GO:1903124)	1	1	0.02	+	44.51	0.0435	0.747
regulation of thioredoxin peroxidase activity (GO:1903123)	1	1	0.02	+	44.51	0.0435	0.746
1-phosphatidyl-1D-myo-inositol 3,5-bisphosphate metabolic process (GO:1903100)	1	1	0.02	+	44.51	0.0435	0.746
positive regulation of membrane hyperpolarization (GO:1902632)	1	1	0.02	+	44.51	0.0435	0.745
negative regulation of response to gamma radiation (GO:2001229)	1	1	0.02	+	44.51	0.0435	0.744
negative regulation of the force of heart contraction involved in baroreceptor response to increased systemic arterial blood pressure (GO:0001986)	1	1	0.02	+	44.51	0.0435	0.743
negative regulation of heart rate involved in baroreceptor response to increased systemic arterial blood pressure (GO:0001985)	1	1	0.02	+	44.51	0.0435	0.742
patched ligand maturation (GO:0007225)	1	1	0.02	+	44.51	0.0435	0.742
negative regulation of N-terminal protein palmitoylation (GO:0060262)	1	1	0.02	+	44.51	0.0435	0.741
regulation of N-terminal protein palmitoylation (GO:0060254)	1	1	0.02	+	44.51	0.0435	0.74
negative regulation of cardiac muscle cell myoblast differentiation (GO:2000691)	1	1	0.02	+	44.51	0.0435	0.739
regulation of cardiac muscle cell myoblast differentiation (GO:2000690)	1	1	0.02	+	44.51	0.0435	0.738
outer medullary collecting duct development (GO:0072060)	1	1	0.02	+	44.51	0.0435	0.738
eye blink reflex (GO:0060082)	1	1	0.02	+	44.51	0.0435	0.737
VEGF-activated neuropilin signaling pathway (GO:0038190)	2	2	0.04	+	44.51	0.00281	0.148
VEGF-activated neuropilin signaling pathway involved in axon guidance (GO:1902378)	1	1	0.02	+	44.51	0.0435	0.736
detoxification of cadmium ion (GO:0071585)	1	1	0.02	+	44.51	0.0435	0.735
negative regulation of zinc ion transmembrane import (GO:0071584)	1	1	0.02	+	44.51	0.0435	0.734
regulation of zinc ion transmembrane import (GO:0071581)	1	1	0.02	+	44.51	0.0435	0.734
negative regulation of cellular amine catabolic process (GO:0033242)	1	1	0.02	+	44.51	0.0435	0.733
regulation of cellular amine catabolic process (GO:0033241)	1	1	0.02	+	44.51	0.0435	0.732
termination of G protein-coupled receptor signaling pathway (GO:0038032)	1	1	0.02	+	44.51	0.0435	0.731
myofibroblast contraction (GO:1990764)	1	1	0.02	+	44.51	0.0435	0.731
asymmetric protein localization involved in cell fate determination (GO:0045167)	1	1	0.02	+	44.51	0.0435	0.73
lysophospholipid translocation (GO:0140329)	1	1	0.02	+	44.51	0.0435	0.729
interleukin-9 production (GO:0032638)	1	1	0.02	+	44.51	0.0435	0.728
negative regulation of cellular amino acid biosynthetic process (GO:2000283)	1	1	0.02	+	44.51	0.0435	0.727
establishment of ER localization (GO:0051686)	1	1	0.02	+	44.51	0.0435	0.727
response to biotin (GO:0070781)	1	1	0.02	+	44.51	0.0435	0.726
negative regulation of elastin biosynthetic process (GO:0051545)	1	1	0.02	+	44.51	0.0435	0.725
regulation of elastin biosynthetic process (GO:0051543)	1	1	0.02	+	44.51	0.0435	0.724
histone biotinylation (GO:0071110)	1	1	0.02	+	44.51	0.0435	0.724
positive regulation of tetrapyrrole biosynthetic process (GO:1901465)	1	1	0.02	+	44.51	0.0435	0.723
regulation of cellular response to manganese ion (GO:1905802)	1	1	0.02	+	44.51	0.0435	0.722
anterograde dendritic transport of mitochondrion (GO:0098972)	1	1	0.02	+	44.51	0.0435	0.721
positive regulation of inhibitory synapse assembly (GO:1905704)	2	2	0.04	+	44.51	0.00281	0.147
regulation of collateral sprouting of intact axon in response to injury (GO:0048683)	1	1	0.02	+	44.51	0.0435	0.721
uterine smooth muscle contraction (GO:0070471)	1	1	0.02	+	44.51	0.0435	0.72
negative regulation of extracellular matrix assembly (GO:1901202)	1	1	0.02	+	44.51	0.0435	0.719
positive regulation of heme biosynthetic process (GO:0070455)	1	1	0.02	+	44.51	0.0435	0.718
chemoattraction of dopaminergic neuron axon (GO:0036516)	1	1	0.02	+	44.51	0.0435	0.718
positive regulation of L-arginine import across plasma membrane (GO:1905589)	1	1	0.02	+	44.51	0.0435	0.717
stress response to cadmium ion (GO:1990170)	1	1	0.02	+	44.51	0.0435	0.716
regulation of L-arginine import across plasma membrane (GO:1905541)	1	1	0.02	+	44.51	0.0435	0.715
negative regulation of the force of heart contraction (GO:0098736)	1	1	0.02	+	44.51	0.0435	0.715
establishment of endoplasmic reticulum localization to postsynapse (GO:0099089)	1	1	0.02	+	44.51	0.0435	0.714
negative regulation of macrophage proliferation (GO:0120042)	1	1	0.02	+	44.51	0.0435	0.713
Wnt signalosome assembly (GO:1904887)	1	1	0.02	+	44.51	0.0435	0.712
protein biotinylation (GO:0009305)	1	1	0.02	+	44.51	0.0435	0.712
negative regulation of cytoplasmic translational elongation (GO:1900248)	1	1	0.02	+	44.51	0.0435	0.711
negative regulation of mini excitatory postsynaptic potential (GO:0061886)	1	1	0.02	+	44.51	0.0435	0.71
negative regulation of parkin-mediated stimulation of mitophagy in response to mitochondrial depolarization (GO:1905090)	1	1	0.02	+	44.51	0.0435	0.709
regulation of parkin-mediated stimulation of mitophagy in response to mitochondrial depolarization (GO:1905089)	1	1	0.02	+	44.51	0.0435	0.709
otic placode development (GO:1905040)	1	1	0.02	+	44.51	0.0435	0.708
positive regulation of L-lysine import across plasma membrane (GO:1905010)	1	1	0.02	+	44.51	0.0435	0.707
regulation of L-lysine import across plasma membrane (GO:1905008)	1	1	0.02	+	44.51	0.0435	0.706
substrate localization to autophagosome (GO:0061753)	1	1	0.02	+	44.51	0.0435	0.706
engulfment of target by autophagosome (GO:0061736)	1	1	0.02	+	44.51	0.0435	0.705
endothelin maturation (GO:0034959)	1	1	0.02	+	44.51	0.0435	0.704
positive regulation of potassium:proton exchanging ATPase activity (GO:1904453)	1	1	0.02	+	44.51	0.0435	0.704
regulation of potassium:proton exchanging ATPase activity (GO:1904451)	1	1	0.02	+	44.51	0.0435	0.703
negative regulation of arginine catabolic process (GO:1900082)	1	1	0.02	+	44.51	0.0435	0.702
regulation of arginine catabolic process (GO:1900081)	1	1	0.02	+	44.51	0.0435	0.701
negative regulation of non-membrane spanning protein tyrosine kinase activity (GO:1903996)	1	1	0.02	+	44.51	0.0435	0.701
regulation of phosphatidylserine metabolic process (GO:0150178)	1	1	0.02	+	44.51	0.0435	0.7
regulation of phosphatidylethanolamine metabolic process (GO:0150175)	1	1	0.02	+	44.51	0.0435	0.699
positive regulation of CD80 production (GO:0150145)	1	1	0.02	+	44.51	0.0435	0.699
regulation of CD80 production (GO:0150143)	1	1	0.02	+	44.51	0.0435	0.698
positive regulation of CD86 production (GO:0150142)	1	1	0.02	+	44.51	0.0435	0.697
regulation of CD86 production (GO:0150140)	1	1	0.02	+	44.51	0.0435	0.696
negative regulation of cholesterol esterification (GO:0150110)	1	1	0.02	+	44.51	0.0435	0.696
brassinosteroid biosynthetic process (GO:0016132)	1	1	0.02	+	44.51	0.0435	0.695
brassinosteroid metabolic process (GO:0016131)	1	1	0.02	+	44.51	0.0435	0.694
calcitonin catabolic process (GO:0010816)	1	1	0.02	+	44.51	0.0435	0.694
substance P catabolic process (GO:0010814)	1	1	0.02	+	44.51	0.0435	0.693
glycine secretion, neurotransmission (GO:0061537)	1	1	0.02	+	44.51	0.0435	0.692
glycine secretion (GO:0061536)	1	1	0.02	+	44.51	0.0435	0.692
positive regulation of iron ion transmembrane transporter activity (GO:1904256)	1	1	0.02	+	44.51	0.0435	0.691
regulation of iron ion transmembrane transporter activity (GO:1904254)	1	1	0.02	+	44.51	0.0435	0.69
renal artery morphogenesis (GO:0061441)	1	1	0.02	+	44.51	0.0435	0.689
cell migration involved in coronary vasculogenesis (GO:0060980)	1	1	0.02	+	44.51	0.0435	0.689
cardiac cell fate specification (GO:0060912)	1	1	0.02	+	44.51	0.0435	0.688
protein O-GlcNAcylation via threonine (GO:0097370)	1	1	0.02	+	44.51	0.0435	0.687
protein localization to ciliary inversin compartment (GO:1904108)	1	1	0.02	+	44.51	0.0435	0.687
cerebellum vasculature morphogenesis (GO:0061301)	1	1	0.02	+	44.51	0.0435	0.686
positive regulation of protein kinase D signaling (GO:1903572)	1	1	0.02	+	44.51	0.0435	0.685
regulation of protein kinase D signaling (GO:1903570)	1	1	0.02	+	44.51	0.0435	0.685
cellular response to methyl methanesulfonate (GO:0072703)	1	1	0.02	+	44.51	0.0435	0.684
response to methyl methanesulfonate (GO:0072702)	1	1	0.02	+	44.51	0.0435	0.683
response to carbon monoxide (GO:0034465)	1	1	0.02	+	44.51	0.0435	0.683
branch elongation involved in ureteric bud branching (GO:0060681)	1	1	0.02	+	44.51	0.0435	0.682
positive regulation of type III interferon production (GO:0034346)	1	1	0.02	+	44.51	0.0435	0.681
regulation of type III interferon production (GO:0034344)	1	1	0.02	+	44.51	0.0435	0.681
eye pigment granule organization (GO:0008057)	1	1	0.02	+	44.51	0.0435	0.68
norepinephrine-epinephrine vasoconstriction involved in regulation of systemic arterial blood pressure (GO:0001994)	3	2	0.07	+	29.67	0.00461	0.196
baroreceptor response to increased systemic arterial blood pressure (GO:0001983)	3	2	0.07	+	29.67	0.00461	0.195
positive regulation of platelet-derived growth factor receptor-beta signaling pathway (GO:2000588)	3	2	0.07	+	29.67	0.00461	0.195
neuropilin signaling pathway (GO:0038189)	3	2	0.07	+	29.67	0.00461	0.194
positive regulation of retinal ganglion cell axon guidance (GO:1902336)	3	2	0.07	+	29.67	0.00461	0.194
regulation of zinc ion transport (GO:0071579)	3	2	0.07	+	29.67	0.00461	0.193
inter-male aggressive behavior (GO:0002121)	3	2	0.07	+	29.67	0.00461	0.193
zonula adherens maintenance (GO:0045218)	3	2	0.07	+	29.67	0.00461	0.192
insulin receptor signaling pathway via phosphatidylinositol 3-kinase (GO:0038028)	3	2	0.07	+	29.67	0.00461	0.192
positive regulation of excitatory synapse assembly (GO:1904891)	3	2	0.07	+	29.67	0.00461	0.191
fibroblast proliferation (GO:0048144)	3	2	0.07	+	29.67	0.00461	0.191
regulation of non-membrane spanning protein tyrosine kinase activity (GO:1903995)	3	2	0.07	+	29.67	0.00461	0.19
positive regulation of heart rate by epinephrine-norepinephrine (GO:0001996)	5	3	0.11	+	26.71	0.000544	0.0523
neuron-glial cell signaling (GO:0150099)	5	3	0.11	+	26.71	0.000544	0.052
positive regulation of lamellipodium morphogenesis (GO:2000394)	6	3	0.13	+	22.26	0.000803	0.065
negative regulation of cellular amino acid metabolic process (GO:0045763)	2	1	0.04	+	22.26	0.0645	0.868
L-lysine catabolic process (GO:0019477)	2	1	0.04	+	22.26	0.0645	0.868
principal sensory nucleus of trigeminal nerve development (GO:0021740)	2	1	0.04	+	22.26	0.0645	0.867
trigeminal sensory nucleus development (GO:0021730)	2	1	0.04	+	22.26	0.0645	0.866
positive regulation of the force of heart contraction by chemical signal (GO:0003099)	4	2	0.09	+	22.26	0.00682	0.239
sulfur oxidation (GO:0019417)	2	1	0.04	+	22.26	0.0645	0.865
acetate biosynthetic process (GO:0019413)	2	1	0.04	+	22.26	0.0645	0.865
uridine metabolic process (GO:0046108)	2	1	0.04	+	22.26	0.0645	0.864
negative regulation of establishment of endothelial barrier (GO:1903141)	2	1	0.04	+	22.26	0.0645	0.863
vestibulocochlear nerve structural organization (GO:0021649)	2	1	0.04	+	22.26	0.0645	0.863
optic nerve structural organization (GO:0021633)	2	1	0.04	+	22.26	0.0645	0.862
positive regulation of dipeptide transport (GO:2000880)	2	1	0.04	+	22.26	0.0645	0.861
positive regulation of oligopeptide transport (GO:2000878)	2	1	0.04	+	22.26	0.0645	0.86
negative regulation of leucine import (GO:0060358)	2	1	0.04	+	22.26	0.0645	0.86
regulation of leucine import (GO:0060357)	2	1	0.04	+	22.26	0.0645	0.859
positive regulation of axon guidance (GO:1902669)	4	2	0.09	+	22.26	0.00682	0.239
purine ribonucleoside bisphosphate biosynthetic process (GO:0034036)	2	1	0.04	+	22.26	0.0645	0.858
regulation of response to gamma radiation (GO:2001228)	2	1	0.04	+	22.26	0.0645	0.857
negative regulation of protein lipidation (GO:1903060)	2	1	0.04	+	22.26	0.0645	0.857
glycine biosynthetic process, by transamination of glyoxylate (GO:0019265)	2	1	0.04	+	22.26	0.0645	0.856
positive regulation of the force of heart contraction by epinephrine-norepinephrine (GO:0001997)	4	2	0.09	+	22.26	0.00682	0.238
positive regulation of dense core granule biogenesis (GO:2000707)	2	1	0.04	+	22.26	0.0645	0.855
glucocorticoid catabolic process (GO:0006713)	2	1	0.04	+	22.26	0.0645	0.855
positive regulation of dipeptide transmembrane transport (GO:2001150)	2	1	0.04	+	22.26	0.0645	0.854
regulation of dipeptide transmembrane transport (GO:2001148)	2	1	0.04	+	22.26	0.0645	0.853
positive regulation of protein autoubiquitination (GO:1902499)	2	1	0.04	+	22.26	0.0645	0.852
negative regulation of ripoptosome assembly involved in necroptotic process (GO:1902443)	2	1	0.04	+	22.26	0.0645	0.852
regulation of ripoptosome assembly involved in necroptotic process (GO:1902442)	2	1	0.04	+	22.26	0.0645	0.851
nerve growth factor production (GO:0032902)	2	1	0.04	+	22.26	0.0645	0.85
creatine biosynthetic process (GO:0006601)	2	1	0.04	+	22.26	0.0645	0.85
creatine metabolic process (GO:0006600)	2	1	0.04	+	22.26	0.0645	0.849
renal outer medulla development (GO:0072054)	2	1	0.04	+	22.26	0.0645	0.848
protein transport into plasma membrane raft (GO:0044861)	2	1	0.04	+	22.26	0.0645	0.847
neurotrophin production (GO:0032898)	2	1	0.04	+	22.26	0.0645	0.847
interleukin-33-mediated signaling pathway (GO:0038172)	2	1	0.04	+	22.26	0.0645	0.846
Kit signaling pathway (GO:0038109)	2	1	0.04	+	22.26	0.0645	0.845
negative regulation of zinc ion transmembrane transport (GO:0071583)	2	1	0.04	+	22.26	0.0645	0.845
negative regulation of zinc ion transport (GO:0071582)	2	1	0.04	+	22.26	0.0645	0.844
regulation of zinc ion transmembrane transport (GO:0071580)	2	1	0.04	+	22.26	0.0645	0.843
lysine catabolic process (GO:0006554)	2	1	0.04	+	22.26	0.0645	0.843
lysophospholipid transport (GO:0051977)	2	1	0.04	+	22.26	0.0645	0.842
negative regulation of peroxidase activity (GO:2000469)	2	1	0.04	+	22.26	0.0645	0.841
negative regulation of cardioblast differentiation (GO:0051892)	2	1	0.04	+	22.26	0.0645	0.84
zonula adherens assembly (GO:0045186)	2	1	0.04	+	22.26	0.0645	0.84
cellular response to high density lipoprotein particle stimulus (GO:0071403)	2	1	0.04	+	22.26	0.0645	0.839
mesenchymal cell differentiation involved in bone development (GO:1901706)	2	1	0.04	+	22.26	0.0645	0.838
negative regulation of lamellipodium morphogenesis (GO:2000393)	2	1	0.04	+	22.26	0.0645	0.838
polysaccharide localization (GO:0033037)	2	1	0.04	+	22.26	0.0645	0.837
retrograde axonal protein transport (GO:0099642)	2	1	0.04	+	22.26	0.0645	0.836
negative regulation of mitochondrial RNA catabolic process (GO:0000961)	2	1	0.04	+	22.26	0.0645	0.836
cellular response to ammonium ion (GO:0071242)	2	1	0.04	+	22.26	0.0645	0.835
uridine catabolic process (GO:0006218)	2	1	0.04	+	22.26	0.0645	0.834
UDP-N-acetylglucosamine transmembrane transport (GO:1990569)	2	1	0.04	+	22.26	0.0645	0.834
negative regulation of endothelial cell development (GO:1901551)	2	1	0.04	+	22.26	0.0645	0.833
Ral protein signal transduction (GO:0032484)	2	1	0.04	+	22.26	0.0645	0.832
positive regulation of tetrapyrrole metabolic process (GO:1901403)	2	1	0.04	+	22.26	0.0645	0.832
negative regulation of establishment of blood-brain barrier (GO:0090212)	2	1	0.04	+	22.26	0.0645	0.831
regulation of establishment of blood-brain barrier (GO:0090210)	4	2	0.09	+	22.26	0.00682	0.237
negative regulation of intracellular cholesterol transport (GO:0032384)	2	1	0.04	+	22.26	0.0645	0.83
negative regulation of intracellular sterol transport (GO:0032381)	2	1	0.04	+	22.26	0.0645	0.829
negative regulation of intracellular lipid transport (GO:0032378)	2	1	0.04	+	22.26	0.0645	0.829
dendritic transport of mitochondrion (GO:0098939)	2	1	0.04	+	22.26	0.0645	0.828
regulation of inhibitory synapse assembly (GO:1905702)	4	2	0.09	+	22.26	0.00682	0.237
negative regulation of negative chemotaxis (GO:0050925)	2	1	0.04	+	22.26	0.0645	0.827
negative regulation of receptor-mediated endocytosis involved in cholesterol transport (GO:1905601)	2	1	0.04	+	22.26	0.0645	0.827
regulation of dipeptide transport (GO:0090089)	2	1	0.04	+	22.26	0.0645	0.826
regulation of oligopeptide transport (GO:0090088)	2	1	0.04	+	22.26	0.0645	0.825
negative regulation of low-density lipoprotein receptor activity (GO:1905598)	2	1	0.04	+	22.26	0.0645	0.825
negative regulation of leucine import across plasma membrane (GO:1905533)	2	1	0.04	+	22.26	0.0645	0.824
regulation of leucine import across plasma membrane (GO:1905532)	2	1	0.04	+	22.26	0.0645	0.823
ciliary transition zone assembly (GO:1905349)	2	1	0.04	+	22.26	0.0645	0.823
negative regulation of calcium ion transmembrane transport via high voltage-gated calcium channel (GO:1904878)	2	1	0.04	+	22.26	0.0645	0.822
dorsal root ganglion morphogenesis (GO:1904835)	2	1	0.04	+	22.26	0.0645	0.821
cellular response to stem cell factor stimulus (GO:0036216)	2	1	0.04	+	22.26	0.0645	0.821
response to stem cell factor (GO:0036215)	2	1	0.04	+	22.26	0.0645	0.82
positive regulation of platelet formation (GO:1905221)	2	1	0.04	+	22.26	0.0645	0.819
regulation of platelet formation (GO:1905219)	2	1	0.04	+	22.26	0.0645	0.819
L-alanine catabolic process (GO:0042853)	2	1	0.04	+	22.26	0.0645	0.818
male germ-line stem cell asymmetric division (GO:0048133)	4	2	0.09	+	22.26	0.00682	0.236
3'-phosphoadenosine 5'-phosphosulfate biosynthetic process (GO:0050428)	2	1	0.04	+	22.26	0.0645	0.817
progesterone secretion (GO:0042701)	2	1	0.04	+	22.26	0.0645	0.817
semaphorin-plexin signaling pathway involved in bone trabecula morphogenesis (GO:1900220)	2	1	0.04	+	22.26	0.0645	0.816
phosphatidylinositol 5-phosphate metabolic process (GO:1904562)	2	1	0.04	+	22.26	0.0645	0.816
establishment or maintenance of polarity of embryonic epithelium (GO:0016332)	2	1	0.04	+	22.26	0.0645	0.815
histone H3-T6 phosphorylation (GO:0035408)	2	1	0.04	+	22.26	0.0645	0.814
positive regulation of iron ion import across plasma membrane (GO:1904440)	2	1	0.04	+	22.26	0.0645	0.814
positive regulation of non-membrane spanning protein tyrosine kinase activity (GO:1903997)	2	1	0.04	+	22.26	0.0645	0.813
angiotensin-activated signaling pathway involved in heart process (GO:0086098)	2	1	0.04	+	22.26	0.0645	0.812
lysine biosynthetic process (GO:0009085)	2	1	0.04	+	22.26	0.0645	0.812
negative regulation of small intestine smooth muscle contraction (GO:1904348)	2	1	0.04	+	22.26	0.0645	0.811
cellular stress response to acid chemical (GO:0097533)	2	1	0.04	+	22.26	0.0645	0.81
stress response to acid chemical (GO:0097532)	2	1	0.04	+	22.26	0.0645	0.81
negative regulation of gastro-intestinal system smooth muscle contraction (GO:1904305)	2	1	0.04	+	22.26	0.0645	0.809
phytosteroid biosynthetic process (GO:0016129)	2	1	0.04	+	22.26	0.0645	0.808
phytosteroid metabolic process (GO:0016128)	2	1	0.04	+	22.26	0.0645	0.808
neuropeptide catabolic process (GO:0010813)	2	1	0.04	+	22.26	0.0645	0.807
negative regulation of ATF6-mediated unfolded protein response (GO:1903892)	2	1	0.04	+	22.26	0.0645	0.806
ganglion morphogenesis (GO:0061552)	2	1	0.04	+	22.26	0.0645	0.806
glycine import across plasma membrane (GO:1903804)	2	1	0.04	+	22.26	0.0645	0.805
positive regulation of iron ion transmembrane transport (GO:0034761)	2	1	0.04	+	22.26	0.0645	0.805
oxalic acid secretion (GO:0046724)	2	1	0.04	+	22.26	0.0645	0.804
positive regulation of iron ion transport (GO:0034758)	2	1	0.04	+	22.26	0.0645	0.803
keratan sulfate metabolic process (GO:0042339)	2	1	0.04	+	22.26	0.0645	0.803
membrane protein proteolysis involved in retrograde protein transport, ER to cytosol (GO:1904211)	2	1	0.04	+	22.26	0.0645	0.802
CDP-diacylglycerol biosynthetic process (GO:0016024)	2	1	0.04	+	22.26	0.0645	0.801
positive regulation of wound healing, spreading of epidermal cells (GO:1903691)	2	1	0.04	+	22.26	0.0645	0.801
lysine biosynthetic process via aminoadipic acid (GO:0019878)	2	1	0.04	+	22.26	0.0645	0.8
cerebellum vasculature development (GO:0061300)	2	1	0.04	+	22.26	0.0645	0.799
branching involved in lymph vessel morphogenesis (GO:0060854)	2	1	0.04	+	22.26	0.0645	0.799
L-lysine metabolic process (GO:0046440)	2	1	0.04	+	22.26	0.0645	0.798
transition between slow and fast fiber (GO:0014886)	2	1	0.04	+	22.26	0.0645	0.798
protein localization to early endosome (GO:1902946)	2	1	0.04	+	22.26	0.0645	0.797
regulation of nucleus organization (GO:1903353)	2	1	0.04	+	22.26	0.0645	0.796
propionate biosynthetic process (GO:0019542)	2	1	0.04	+	22.26	0.0645	0.796
chemorepulsion involved in postnatal olfactory bulb interneuron migration (GO:0021836)	2	1	0.04	+	22.26	0.0645	0.795
coronary vein morphogenesis (GO:0003169)	2	1	0.04	+	22.26	0.0645	0.795
regulation of lamellipodium morphogenesis (GO:2000392)	9	4	0.2	+	19.78	0.000141	0.02
locomotion involved in locomotory behavior (GO:0031987)	9	4	0.2	+	19.78	0.000141	0.0198
regulation of systemic arterial blood pressure by baroreceptor feedback (GO:0003025)	7	3	0.16	+	19.08	0.00113	0.0813
positive regulation of blood pressure by epinephrine-norepinephrine (GO:0003321)	7	3	0.16	+	19.08	0.00113	0.0809
central nervous system vasculogenesis (GO:0022009)	5	2	0.11	+	17.8	0.0094	0.304
regulation of systemic arterial blood pressure by carotid sinus baroreceptor feedback (GO:0001978)	5	2	0.11	+	17.8	0.0094	0.304
protein retention in Golgi apparatus (GO:0045053)	5	2	0.11	+	17.8	0.0094	0.303
regulation of postsynaptic cytosolic calcium ion concentration (GO:0099566)	5	2	0.11	+	17.8	0.0094	0.302
regulation of retinal ganglion cell axon guidance (GO:0090259)	5	2	0.11	+	17.8	0.0094	0.302
central nervous system myelin formation (GO:0032289)	5	2	0.11	+	17.8	0.0094	0.301
germline stem cell asymmetric division (GO:0098728)	5	2	0.11	+	17.8	0.0094	0.3
extracellular matrix-cell signaling (GO:0035426)	5	2	0.11	+	17.8	0.0094	0.3
positive regulation of platelet-derived growth factor receptor signaling pathway (GO:0010641)	5	2	0.11	+	17.8	0.0094	0.299
germ-line stem cell division (GO:0042078)	5	2	0.11	+	17.8	0.0094	0.299
regulation of systemic arterial blood pressure by norepinephrine-epinephrine (GO:0001993)	8	3	0.18	+	16.69	0.00153	0.0983
retinal pigment epithelium development (GO:0003406)	8	3	0.18	+	16.69	0.00153	0.0979
L-cysteine catabolic process (GO:0019448)	3	1	0.07	+	14.84	0.085	0.932
angiotensin-mediated drinking behavior (GO:0003051)	3	1	0.07	+	14.84	0.085	0.931
urea transmembrane transport (GO:0071918)	3	1	0.07	+	14.84	0.085	0.931
negative regulation of mammary gland epithelial cell proliferation (GO:0033600)	6	2	0.13	+	14.84	0.0124	0.352
response to ammonium ion (GO:0060359)	3	1	0.07	+	14.84	0.085	0.93
primitive erythrocyte differentiation (GO:0060319)	3	1	0.07	+	14.84	0.085	0.93
renal response to blood flow involved in circulatory renin-angiotensin regulation of systemic arterial blood pressure (GO:0001999)	3	1	0.07	+	14.84	0.085	0.929
regulation of dense core granule biogenesis (GO:2000705)	3	1	0.07	+	14.84	0.085	0.928
defense response to tumor cell (GO:0002357)	3	1	0.07	+	14.84	0.085	0.928
regulation of exocyst localization (GO:0060178)	3	1	0.07	+	14.84	0.085	0.927
inner medullary collecting duct development (GO:0072061)	3	1	0.07	+	14.84	0.085	0.926
renal inner medulla development (GO:0072053)	3	1	0.07	+	14.84	0.085	0.926
protein localization to plasma membrane raft (GO:0044860)	3	1	0.07	+	14.84	0.085	0.925
positive regulation of low-density lipoprotein particle receptor catabolic process (GO:0032805)	3	1	0.07	+	14.84	0.085	0.924
lysine metabolic process (GO:0006553)	3	1	0.07	+	14.84	0.085	0.924
alanine catabolic process (GO:0006524)	3	1	0.07	+	14.84	0.085	0.923
otolith mineralization (GO:0045299)	3	1	0.07	+	14.84	0.085	0.923
positive regulation of catecholamine uptake involved in synaptic transmission (GO:0051944)	3	1	0.07	+	14.84	0.085	0.922
positive regulation of cell proliferation by VEGF-activated platelet derived growth factor receptor signaling pathway (GO:0038091)	3	1	0.07	+	14.84	0.085	0.921
VEGF-activated platelet-derived growth factor receptor signaling pathway (GO:0038086)	3	1	0.07	+	14.84	0.085	0.921
manganese ion transmembrane transport (GO:0071421)	6	2	0.13	+	14.84	0.0124	0.351
norepinephrine-epinephrine-mediated vasodilation involved in regulation of systemic arterial blood pressure (GO:0002025)	3	1	0.07	+	14.84	0.085	0.92
regulation of renal output by angiotensin (GO:0002019)	3	1	0.07	+	14.84	0.085	0.919
positive regulation of histone deacetylase activity (GO:1901727)	6	2	0.13	+	14.84	0.0124	0.351
primary ovarian follicle growth (GO:0001545)	3	1	0.07	+	14.84	0.085	0.919
ovarian follicle rupture (GO:0001543)	3	1	0.07	+	14.84	0.085	0.918
interleukin-21 production (GO:0032625)	3	1	0.07	+	14.84	0.085	0.917
cellular response to progesterone stimulus (GO:0071393)	3	1	0.07	+	14.84	0.085	0.917
directional locomotion (GO:0033058)	3	1	0.07	+	14.84	0.085	0.916
regulation of cellular amino acid biosynthetic process (GO:2000282)	3	1	0.07	+	14.84	0.085	0.916
maintenance of Golgi location (GO:0051684)	3	1	0.07	+	14.84	0.085	0.915
5-methylcytosine catabolic process (GO:0006211)	3	1	0.07	+	14.84	0.085	0.914
protein targeting to vacuole involved in autophagy (GO:0071211)	3	1	0.07	+	14.84	0.085	0.914
negative regulation of adenylate cyclase-activating adrenergic receptor signaling pathway involved in heart process (GO:0140199)	3	1	0.07	+	14.84	0.085	0.913
negative regulation of DNA methylation-dependent heterochromatin assembly (GO:0090310)	3	1	0.07	+	14.84	0.085	0.912
positive regulation of peptidyl-cysteine S-nitrosylation (GO:2000170)	3	1	0.07	+	14.84	0.085	0.912
response to hydrostatic pressure (GO:0051599)	3	1	0.07	+	14.84	0.085	0.911
positive regulation of dopamine uptake involved in synaptic transmission (GO:0051586)	3	1	0.07	+	14.84	0.085	0.911
positive regulation of lymphangiogenesis (GO:1901492)	3	1	0.07	+	14.84	0.085	0.91
regulation of tetrapyrrole biosynthetic process (GO:1901463)	3	1	0.07	+	14.84	0.085	0.909
nuclear matrix anchoring at nuclear membrane (GO:0090292)	3	1	0.07	+	14.84	0.085	0.909
acetate metabolic process (GO:0006083)	3	1	0.07	+	14.84	0.085	0.908
prostaglandin secretion (GO:0032310)	3	1	0.07	+	14.84	0.085	0.908
smooth muscle cell proliferation (GO:0048659)	6	2	0.13	+	14.84	0.0124	0.35
regulation of high-density lipoprotein particle assembly (GO:0090107)	3	1	0.07	+	14.84	0.085	0.907
negative regulation of blood-brain barrier permeability (GO:1905604)	3	1	0.07	+	14.84	0.085	0.906
regulation of heme biosynthetic process (GO:0070453)	3	1	0.07	+	14.84	0.085	0.906
nuclear matrix organization (GO:0043578)	3	1	0.07	+	14.84	0.085	0.905
ceramide translocation (GO:0099040)	3	1	0.07	+	14.84	0.085	0.904
glyoxylate catabolic process (GO:0009436)	3	1	0.07	+	14.84	0.085	0.904
negative regulation of NMDA glutamate receptor activity (GO:1904782)	3	1	0.07	+	14.84	0.085	0.903
negative regulation of myofibroblast differentiation (GO:1904761)	3	1	0.07	+	14.84	0.085	0.903
L-alanine metabolic process (GO:0042851)	3	1	0.07	+	14.84	0.085	0.902
histone dephosphorylation (GO:0016576)	6	2	0.13	+	14.84	0.0124	0.35
negative regulation of vascular associated smooth muscle contraction (GO:1904694)	3	1	0.07	+	14.84	0.085	0.901
response to cholecystokinin (GO:0061847)	3	1	0.07	+	14.84	0.085	0.901
protein localization to tricellular tight junction (GO:0061833)	3	1	0.07	+	14.84	0.085	0.9
positive regulation of renin secretion into blood stream (GO:1900135)	3	1	0.07	+	14.84	0.085	0.9
sensitization (GO:0046960)	3	1	0.07	+	14.84	0.085	0.899
regulation of iron ion import across plasma membrane (GO:1904438)	3	1	0.07	+	14.84	0.085	0.898
regulation of L-arginine import (GO:0010963)	3	1	0.07	+	14.84	0.085	0.898
cysteine catabolic process (GO:0009093)	3	1	0.07	+	14.84	0.085	0.897
pyruvate family amino acid catabolic process (GO:0009080)	3	1	0.07	+	14.84	0.085	0.897
stomach development (GO:0062094)	3	1	0.07	+	14.84	0.085	0.896
regulation of ATF6-mediated unfolded protein response (GO:1903891)	3	1	0.07	+	14.84	0.085	0.895
positive regulation of cristae formation (GO:1903852)	3	1	0.07	+	14.84	0.085	0.895
basal dendrite arborization (GO:0150020)	3	1	0.07	+	14.84	0.085	0.894
basal dendrite morphogenesis (GO:0150019)	3	1	0.07	+	14.84	0.085	0.894
basal dendrite development (GO:0150018)	3	1	0.07	+	14.84	0.085	0.893
motor neuron migration (GO:0097475)	6	2	0.13	+	14.84	0.0124	0.349
vitamin E metabolic process (GO:0042360)	3	1	0.07	+	14.84	0.085	0.892
negative regulation of nitric oxide mediated signal transduction (GO:0010751)	3	1	0.07	+	14.84	0.085	0.892
sensory neuron axon guidance (GO:0097374)	3	1	0.07	+	14.84	0.085	0.891
5-methylcytosine metabolic process (GO:0019857)	3	1	0.07	+	14.84	0.085	0.891
development of secondary male sexual characteristics (GO:0046544)	3	1	0.07	+	14.84	0.085	0.89
cellular response to Thyroglobulin triiodothyronine (GO:1904017)	3	1	0.07	+	14.84	0.085	0.889
response to Thyroglobulin triiodothyronine (GO:1904016)	3	1	0.07	+	14.84	0.085	0.889
positive regulation of gap junction assembly (GO:1903598)	3	1	0.07	+	14.84	0.085	0.888
establishment of cell polarity involved in ameboidal cell migration (GO:0003365)	3	1	0.07	+	14.84	0.085	0.888
positive regulation of extracellular matrix constituent secretion (GO:0003331)	3	1	0.07	+	14.84	0.085	0.887
pilomotor reflex (GO:0097195)	3	1	0.07	+	14.84	0.085	0.887
L-cysteine metabolic process (GO:0046439)	3	1	0.07	+	14.84	0.085	0.886
small-subunit processome assembly (GO:0034462)	3	1	0.07	+	14.84	0.085	0.885
negative regulation of growth rate (GO:0045967)	3	1	0.07	+	14.84	0.085	0.885
neural plate anterior/posterior regionalization (GO:0021999)	3	1	0.07	+	14.84	0.085	0.884
CDP-diacylglycerol metabolic process (GO:0046341)	3	1	0.07	+	14.84	0.085	0.884
regulation of intracellular calcium activated chloride channel activity (GO:1902938)	3	1	0.07	+	14.84	0.085	0.883
positive regulation of rhodopsin gene expression (GO:0045872)	3	1	0.07	+	14.84	0.085	0.882
negative regulation of adherens junction organization (GO:1903392)	3	1	0.07	+	14.84	0.085	0.882
facioacoustic ganglion development (GO:1903375)	3	1	0.07	+	14.84	0.085	0.881
hypothalamic tangential migration using cell-axon interactions (GO:0021856)	3	1	0.07	+	14.84	0.085	0.881
gonadotrophin-releasing hormone neuronal migration to the hypothalamus (GO:0021828)	3	1	0.07	+	14.84	0.085	0.88
postnatal olfactory bulb interneuron migration (GO:0021827)	3	1	0.07	+	14.84	0.085	0.88
substrate-dependent cerebral cortex tangential migration (GO:0021825)	3	1	0.07	+	14.84	0.085	0.879
cerebral cortex tangential migration using cell-cell interactions (GO:0021823)	3	1	0.07	+	14.84	0.085	0.878
positive regulation of cholesterol biosynthetic process (GO:0045542)	10	3	0.22	+	13.35	0.00256	0.139
luteinization (GO:0001553)	10	3	0.22	+	13.35	0.00256	0.139
positive regulation of sterol biosynthetic process (GO:0106120)	10	3	0.22	+	13.35	0.00256	0.138
regulation of the force of heart contraction by chemical signal (GO:0003057)	7	2	0.16	+	12.72	0.0157	0.408
metanephric collecting duct development (GO:0072205)	7	2	0.16	+	12.72	0.0157	0.407
synaptic transmission, glycinergic (GO:0060012)	7	2	0.16	+	12.72	0.0157	0.407
establishment of endothelial blood-brain barrier (GO:0014045)	7	2	0.16	+	12.72	0.0157	0.406
lipid export from cell (GO:0140353)	7	2	0.16	+	12.72	0.0157	0.405
positive regulation of axon extension involved in axon guidance (GO:0048842)	7	2	0.16	+	12.72	0.0157	0.405
negative regulation of membrane protein ectodomain proteolysis (GO:0051045)	7	2	0.16	+	12.72	0.0157	0.404
autophagic cell death (GO:0048102)	7	2	0.16	+	12.72	0.0157	0.403
negative regulation of tubulin deacetylation (GO:1904428)	7	2	0.16	+	12.72	0.0157	0.403
positive regulation of neuron projection arborization (GO:0150012)	7	2	0.16	+	12.72	0.0157	0.402
kidney vasculature morphogenesis (GO:0061439)	7	2	0.16	+	12.72	0.0157	0.401
renal system vasculature morphogenesis (GO:0061438)	7	2	0.16	+	12.72	0.0157	0.401
angiogenesis involved in coronary vascular morphogenesis (GO:0060978)	7	2	0.16	+	12.72	0.0157	0.4
micturition (GO:0060073)	11	3	0.25	+	12.14	0.0032	0.159
angiotensin-activated signaling pathway (GO:0038166)	11	3	0.25	+	12.14	0.0032	0.159
positive regulation of cholesterol metabolic process (GO:0090205)	11	3	0.25	+	12.14	0.0032	0.158
enamel mineralization (GO:0070166)	11	3	0.25	+	12.14	0.0032	0.158
I-kappaB phosphorylation (GO:0007252)	12	3	0.27	+	11.13	0.00394	0.174
establishment of blood-brain barrier (GO:0060856)	12	3	0.27	+	11.13	0.00394	0.174
artery smooth muscle contraction (GO:0014824)	12	3	0.27	+	11.13	0.00394	0.173
regulation of rhodopsin gene expression (GO:0007468)	4	1	0.09	+	11.13	0.105	1
plus-end-directed organelle transport along microtubule (GO:0072386)	4	1	0.09	+	11.13	0.105	1
plus-end-directed vesicle transport along microtubule (GO:0072383)	4	1	0.09	+	11.13	0.105	1
cGMP catabolic process (GO:0046069)	4	1	0.09	+	11.13	0.105	1
regulation of T cell homeostatic proliferation (GO:0046013)	4	1	0.09	+	11.13	0.105	1
Norrin signaling pathway (GO:0110135)	4	1	0.09	+	11.13	0.105	1
negative regulation of adenylate cyclase-activating adrenergic receptor signaling pathway (GO:0071878)	4	1	0.09	+	11.13	0.105	1
response to iron(II) ion (GO:0010040)	4	1	0.09	+	11.13	0.105	1
podosome assembly (GO:0071800)	4	1	0.09	+	11.13	0.105	1
angiotensin-mediated vasoconstriction involved in regulation of systemic arterial blood pressure (GO:0001998)	4	1	0.09	+	11.13	0.105	1
JUN phosphorylation (GO:0007258)	4	1	0.09	+	11.13	0.105	1
Wnt signaling pathway, calcium modulating pathway (GO:0007223)	4	1	0.09	+	11.13	0.105	1
metanephric loop of Henle development (GO:0072236)	4	1	0.09	+	11.13	0.105	1
negative regulation of dendritic cell differentiation (GO:2001199)	4	1	0.09	+	11.13	0.105	1
negative regulation of ATP biosynthetic process (GO:2001170)	4	1	0.09	+	11.13	0.105	1
ATP generation from poly-ADP-D-ribose (GO:1990966)	4	1	0.09	+	11.13	0.105	1
cerebrospinal fluid secretion (GO:0033326)	4	1	0.09	+	11.13	0.105	1
regulation of platelet-derived growth factor receptor-beta signaling pathway (GO:2000586)	8	2	0.18	+	11.13	0.0193	0.468
smooth muscle contraction involved in micturition (GO:0060083)	4	1	0.09	+	11.13	0.105	1
post-embryonic retina morphogenesis in camera-type eye (GO:0060060)	4	1	0.09	+	11.13	0.105	1
oncostatin-M-mediated signaling pathway (GO:0038165)	4	1	0.09	+	11.13	0.105	1
positive regulation of natural killer cell chemotaxis (GO:2000503)	4	1	0.09	+	11.13	0.105	1
alanine metabolic process (GO:0006522)	4	1	0.09	+	11.13	0.105	1
desmosome assembly (GO:0002159)	4	1	0.09	+	11.13	0.105	0.999
regulation of post-translational protein modification (GO:1901873)	4	1	0.09	+	11.13	0.105	0.999
regulation of peroxidase activity (GO:2000468)	4	1	0.09	+	11.13	0.105	0.998
Fc-epsilon receptor signaling pathway (GO:0038095)	4	1	0.09	+	11.13	0.105	0.997
renin-angiotensin regulation of aldosterone production (GO:0002018)	4	1	0.09	+	11.13	0.105	0.997
regulation of histone deacetylase activity (GO:1901725)	8	2	0.18	+	11.13	0.0193	0.467
glomerular visceral epithelial cell migration (GO:0090521)	4	1	0.09	+	11.13	0.105	0.996
positive regulation of ovarian follicle development (GO:2000386)	4	1	0.09	+	11.13	0.105	0.996
medium-chain fatty acid catabolic process (GO:0051793)	4	1	0.09	+	11.13	0.105	0.995
short-chain fatty acid biosynthetic process (GO:0051790)	4	1	0.09	+	11.13	0.105	0.994
negative regulation of neutrophil apoptotic process (GO:0033030)	4	1	0.09	+	11.13	0.105	0.994
protein transport into membrane raft (GO:0032596)	4	1	0.09	+	11.13	0.105	0.993
cellular response to manganese ion (GO:0071287)	4	1	0.09	+	11.13	0.105	0.993
regulation of adenylate cyclase-activating adrenergic receptor signaling pathway involved in heart process (GO:0140192)	4	1	0.09	+	11.13	0.105	0.992
trans-synaptic signaling by endocannabinoid, modulating synaptic transmission (GO:0099553)	4	1	0.09	+	11.13	0.105	0.991
trans-synaptic signaling by lipid, modulating synaptic transmission (GO:0099552)	4	1	0.09	+	11.13	0.105	0.991
regulation of arginine metabolic process (GO:0000821)	4	1	0.09	+	11.13	0.105	0.99
positive regulation of transcription factor catabolic process (GO:1901485)	4	1	0.09	+	11.13	0.105	0.99
regulation of transcription factor catabolic process (GO:1901483)	4	1	0.09	+	11.13	0.105	0.989
regulation of tetrapyrrole metabolic process (GO:1901401)	4	1	0.09	+	11.13	0.105	0.988
canonical Wnt signaling pathway involved in negative regulation of apoptotic process (GO:0044336)	4	1	0.09	+	11.13	0.105	0.988
NMDA selective glutamate receptor signaling pathway (GO:0098989)	4	1	0.09	+	11.13	0.105	0.987
positive regulation of axon extension involved in regeneration (GO:0048691)	4	1	0.09	+	11.13	0.105	0.987
regulation of negative chemotaxis (GO:0050923)	4	1	0.09	+	11.13	0.105	0.986
regulation of receptor-mediated endocytosis involved in cholesterol transport (GO:1905600)	4	1	0.09	+	11.13	0.105	0.986
protein alpha-1,2-demannosylation (GO:0036508)	4	1	0.09	+	11.13	0.105	0.985
protein demannosylation (GO:0036507)	4	1	0.09	+	11.13	0.105	0.984
actin polymerization-dependent cell motility (GO:0070358)	4	1	0.09	+	11.13	0.105	0.984
ventral trunk neural crest cell migration (GO:0036486)	4	1	0.09	+	11.13	0.105	0.983
trunk neural crest cell migration (GO:0036484)	4	1	0.09	+	11.13	0.105	0.983
presynaptic modulation of chemical synaptic transmission (GO:0099171)	8	2	0.18	+	11.13	0.0193	0.466
protein deglycosylation involved in glycoprotein catabolic process (GO:0035977)	4	1	0.09	+	11.13	0.105	0.982
steroid hormone secretion (GO:0035929)	4	1	0.09	+	11.13	0.105	0.981
anterograde neuronal dense core vesicle transport (GO:1990048)	4	1	0.09	+	11.13	0.105	0.981
sphingolipid translocation (GO:0099039)	4	1	0.09	+	11.13	0.105	0.98
regulation of pentose-phosphate shunt (GO:0043456)	4	1	0.09	+	11.13	0.105	0.98
positive regulation of amyloid precursor protein biosynthetic process (GO:0042986)	4	1	0.09	+	11.13	0.105	0.979
positive regulation of memory T cell differentiation (GO:0043382)	4	1	0.09	+	11.13	0.105	0.979
regulation of CAMKK-AMPK signaling cascade (GO:1905289)	4	1	0.09	+	11.13	0.105	0.978
regulation of retrograde transport, endosome to Golgi (GO:1905279)	4	1	0.09	+	11.13	0.105	0.977
regulation of myofibroblast differentiation (GO:1904760)	4	1	0.09	+	11.13	0.105	0.977
positive regulation of mRNA polyadenylation (GO:1900365)	4	1	0.09	+	11.13	0.105	0.976
leukotriene B4 metabolic process (GO:0036102)	4	1	0.09	+	11.13	0.105	0.976
leukotriene B4 catabolic process (GO:0036101)	4	1	0.09	+	11.13	0.105	0.975
leukotriene catabolic process (GO:0036100)	4	1	0.09	+	11.13	0.105	0.975
sulfate assimilation (GO:0000103)	4	1	0.09	+	11.13	0.105	0.974
receptor transactivation (GO:0035624)	4	1	0.09	+	11.13	0.105	0.973
negative regulation of metalloendopeptidase activity (GO:1904684)	4	1	0.09	+	11.13	0.105	0.973
regulation of mini excitatory postsynaptic potential (GO:0061884)	4	1	0.09	+	11.13	0.105	0.972
long-chain fatty acid import into peroxisome (GO:0015910)	4	1	0.09	+	11.13	0.105	0.972
regulation of DNA stability (GO:0097752)	4	1	0.09	+	11.13	0.105	0.971
dense core granule priming (GO:0061789)	4	1	0.09	+	11.13	0.105	0.971
cell migration involved in vasculogenesis (GO:0035441)	4	1	0.09	+	11.13	0.105	0.97
deadenylation-independent decapping of nuclear-transcribed mRNA (GO:0031087)	4	1	0.09	+	11.13	0.105	0.969
positive regulation of hemoglobin biosynthetic process (GO:0046985)	4	1	0.09	+	11.13	0.105	0.969
positive regulation of GTP binding (GO:1904426)	4	1	0.09	+	11.13	0.105	0.968
positive regulation of hippo signaling (GO:0035332)	4	1	0.09	+	11.13	0.105	0.968
pyruvate family amino acid metabolic process (GO:0009078)	4	1	0.09	+	11.13	0.105	0.967
mannose trimming involved in glycoprotein ERAD pathway (GO:1904382)	4	1	0.09	+	11.13	0.105	0.967
trunk segmentation (GO:0035290)	4	1	0.09	+	11.13	0.105	0.966
regulation of cristae formation (GO:1903850)	4	1	0.09	+	11.13	0.105	0.965
sympathetic neuron projection guidance (GO:0097491)	4	1	0.09	+	11.13	0.105	0.965
sympathetic neuron projection extension (GO:0097490)	4	1	0.09	+	11.13	0.105	0.964
vitamin K catabolic process (GO:0042377)	4	1	0.09	+	11.13	0.105	0.964
menaquinone catabolic process (GO:0042361)	4	1	0.09	+	11.13	0.105	0.963
positive regulation of transcription via serum response element binding (GO:0010735)	4	1	0.09	+	11.13	0.105	0.963
negative regulation of hydrogen peroxide biosynthetic process (GO:0010730)	4	1	0.09	+	11.13	0.105	0.962
regulation of definitive erythrocyte differentiation (GO:0010724)	4	1	0.09	+	11.13	0.105	0.962
neural plate regionalization (GO:0060897)	4	1	0.09	+	11.13	0.105	0.961
termination of signal transduction (GO:0023021)	4	1	0.09	+	11.13	0.105	0.96
positive regulation of activation of Janus kinase activity (GO:0010536)	4	1	0.09	+	11.13	0.105	0.96
positive regulation of membrane tubulation (GO:1903527)	4	1	0.09	+	11.13	0.105	0.959
establishment of blood-nerve barrier (GO:0008065)	4	1	0.09	+	11.13	0.105	0.959
hypothalamus gonadotrophin-releasing hormone neuron development (GO:0021888)	4	1	0.09	+	11.13	0.105	0.958
hypothalamus gonadotrophin-releasing hormone neuron differentiation (GO:0021886)	4	1	0.09	+	11.13	0.105	0.958
negative regulation of bicellular tight junction assembly (GO:1903347)	4	1	0.09	+	11.13	0.105	0.957
propionate metabolic process (GO:0019541)	4	1	0.09	+	11.13	0.105	0.957
trachea cartilage morphogenesis (GO:0060535)	4	1	0.09	+	11.13	0.105	0.956
locomotor rhythm (GO:0045475)	17	4	0.38	+	10.47	0.00102	0.0762
regulation of neuron projection arborization (GO:0150011)	13	3	0.29	+	10.27	0.00477	0.194
tonic smooth muscle contraction (GO:0014820)	13	3	0.29	+	10.27	0.00477	0.193
tangential migration from the subventricular zone to the olfactory bulb (GO:0022028)	9	2	0.2	+	9.89	0.0232	0.533
regulation of chloride transport (GO:2001225)	9	2	0.2	+	9.89	0.0232	0.532
receptor catabolic process (GO:0032801)	18	4	0.4	+	9.89	0.00123	0.0855
regulation of peptidyl-cysteine S-nitrosylation (GO:2000169)	9	2	0.2	+	9.89	0.0232	0.532
cell-cell adhesion mediated by cadherin (GO:0044331)	9	2	0.2	+	9.89	0.0232	0.531
positive regulation of deacetylase activity (GO:0090045)	9	2	0.2	+	9.89	0.0232	0.53
peptidyl-serine autophosphorylation (GO:0036289)	9	2	0.2	+	9.89	0.0232	0.529
hepatocyte growth factor receptor signaling pathway (GO:0048012)	9	2	0.2	+	9.89	0.0232	0.529
aspartate transmembrane transport (GO:0015810)	9	2	0.2	+	9.89	0.0232	0.528
cellular response to angiotensin (GO:1904385)	18	4	0.4	+	9.89	0.00123	0.0851
adherens junction maintenance (GO:0034334)	9	2	0.2	+	9.89	0.0232	0.527
retinal rod cell development (GO:0046548)	14	3	0.31	+	9.54	0.0057	0.215
physiological cardiac muscle hypertrophy (GO:0003301)	14	3	0.31	+	9.54	0.0057	0.214
physiological muscle hypertrophy (GO:0003298)	14	3	0.31	+	9.54	0.0057	0.214
cell growth involved in cardiac muscle cell development (GO:0061049)	14	3	0.31	+	9.54	0.0057	0.213
regulation of cholesterol biosynthetic process (GO:0045540)	19	4	0.43	+	9.37	0.00146	0.0958
regulation of sterol biosynthetic process (GO:0106118)	19	4	0.43	+	9.37	0.00146	0.0954
negative regulation of chromatin assembly or disassembly (GO:0045798)	5	1	0.11	+	8.9	0.125	1
positive regulation of adenylate cyclase activity (GO:0045762)	10	2	0.22	+	8.9	0.0275	0.585
cerebellar granule cell differentiation (GO:0021707)	10	2	0.22	+	8.9	0.0275	0.584
lobar bronchus development (GO:0060482)	5	1	0.11	+	8.9	0.125	1
negative regulation of lamellipodium organization (GO:1902744)	5	1	0.11	+	8.9	0.125	1
negative regulation of toll-like receptor 2 signaling pathway (GO:0034136)	5	1	0.11	+	8.9	0.125	1
somatic diversification of T cell receptor genes (GO:0002568)	5	1	0.11	+	8.9	0.125	1
protein deubiquitination involved in ubiquitin-dependent protein catabolic process (GO:0071947)	5	1	0.11	+	8.9	0.125	1
positive regulation of melanocyte differentiation (GO:0045636)	5	1	0.11	+	8.9	0.125	1
cerebellar granular layer formation (GO:0021684)	10	2	0.22	+	8.9	0.0275	0.583
galactolipid biosynthetic process (GO:0019375)	5	1	0.11	+	8.9	0.125	1
trigeminal nerve structural organization (GO:0021637)	5	1	0.11	+	8.9	0.125	1
trigeminal nerve morphogenesis (GO:0021636)	5	1	0.11	+	8.9	0.125	1
minus-end-directed organelle transport along microtubule (GO:0072385)	5	1	0.11	+	8.9	0.125	1
zygotic determination of anterior/posterior axis, embryo (GO:0007354)	5	1	0.11	+	8.9	0.125	1
growth hormone receptor signaling pathway via JAK-STAT (GO:0060397)	5	1	0.11	+	8.9	0.125	1
regulation of axon guidance (GO:1902667)	15	3	0.34	+	8.9	0.00673	0.238
protein localization to adherens junction (GO:0071896)	5	1	0.11	+	8.9	0.125	1
tricarboxylic acid transport (GO:0006842)	5	1	0.11	+	8.9	0.125	1
Notch receptor processing (GO:0007220)	10	2	0.22	+	8.9	0.0275	0.582
pro-B cell differentiation (GO:0002328)	5	1	0.11	+	8.9	0.125	1
regulation of protein autoubiquitination (GO:1902498)	5	1	0.11	+	8.9	0.125	1
positive regulation of dopamine receptor signaling pathway (GO:0060161)	5	1	0.11	+	8.9	0.125	1
galactosylceramide biosynthetic process (GO:0006682)	5	1	0.11	+	8.9	0.125	1
microglial cell activation involved in immune response (GO:0002282)	5	1	0.11	+	8.9	0.125	1
positive regulation of cellular pH reduction (GO:0032849)	5	1	0.11	+	8.9	0.125	1
regulation of natural killer cell chemotaxis (GO:2000501)	5	1	0.11	+	8.9	0.125	1
glycine biosynthetic process (GO:0006545)	5	1	0.11	+	8.9	0.125	1
protein localization to paranode region of axon (GO:0002175)	5	1	0.11	+	8.9	0.125	1
negative regulation of mitochondrial depolarization (GO:0051902)	5	1	0.11	+	8.9	0.125	1
T cell receptor V(D)J recombination (GO:0033153)	5	1	0.11	+	8.9	0.125	1
tooth eruption (GO:0044691)	5	1	0.11	+	8.9	0.125	1
positive regulation of glucocorticoid receptor signaling pathway (GO:2000324)	5	1	0.11	+	8.9	0.125	1
quinone catabolic process (GO:1901662)	5	1	0.11	+	8.9	0.125	1
regulation of mast cell apoptotic process (GO:0033025)	5	1	0.11	+	8.9	0.125	1
ventricular cardiac muscle cell membrane repolarization (GO:0099625)	5	1	0.11	+	8.9	0.125	1
regulation of mitochondrial RNA catabolic process (GO:0000960)	5	1	0.11	+	8.9	0.125	1
protein localization to juxtaparanode region of axon (GO:0071205)	5	1	0.11	+	8.9	0.125	1
negative regulation of amyloid fibril formation (GO:1905907)	5	1	0.11	+	8.9	0.125	1
regulation of endothelial tube morphogenesis (GO:1901509)	5	1	0.11	+	8.9	0.125	1
leukemia inhibitory factor signaling pathway (GO:0048861)	5	1	0.11	+	8.9	0.125	1
presynaptic dense core vesicle exocytosis (GO:0099525)	5	1	0.11	+	8.9	0.125	1
positive regulation of neurotransmitter uptake (GO:0051582)	5	1	0.11	+	8.9	0.125	1
citrate metabolic process (GO:0006101)	5	1	0.11	+	8.9	0.125	1
response to interleukin-2 (GO:0070669)	5	1	0.11	+	8.9	0.125	1
lipid droplet formation (GO:0140042)	10	2	0.22	+	8.9	0.0275	0.582
negative regulation of phospholipid biosynthetic process (GO:0071072)	5	1	0.11	+	8.9	0.125	1
lipid transport across blood-brain barrier (GO:1990379)	5	1	0.11	+	8.9	0.125	1
anterograde axonal transport of mitochondrion (GO:0098957)	5	1	0.11	+	8.9	0.125	1
myoblast proliferation (GO:0051450)	5	1	0.11	+	8.9	0.125	1
cadmium ion transmembrane transport (GO:0070574)	5	1	0.11	+	8.9	0.125	1
positive regulation of sprouting of injured axon (GO:0048687)	5	1	0.11	+	8.9	0.125	1
positive regulation of adenylate cyclase-activating G protein-coupled receptor signaling pathway (GO:0106071)	5	1	0.11	+	8.9	0.125	1
sensory perception of sour taste (GO:0050915)	5	1	0.11	+	8.9	0.125	1
negative regulation of neurotrophin TRK receptor signaling pathway (GO:0051387)	5	1	0.11	+	8.9	0.125	1
negative regulation of heterochromatin organization (GO:0120262)	5	1	0.11	+	8.9	0.125	1
maintenance of animal organ identity (GO:0048496)	5	1	0.11	+	8.9	0.125	1
negative regulation of lipoprotein metabolic process (GO:0050748)	5	1	0.11	+	8.9	0.125	1
positive regulation of Fc-gamma receptor signaling pathway involved in phagocytosis (GO:1905451)	5	1	0.11	+	8.9	0.125	1
retrograde neuronal dense core vesicle transport (GO:1990049)	5	1	0.11	+	8.9	0.125	1
negative regulation of activation-induced cell death of T cells (GO:0070236)	5	1	0.11	+	8.9	0.125	1
vascular endothelial growth factor receptor-2 signaling pathway (GO:0036324)	5	1	0.11	+	8.9	0.125	1
neuronal dense core vesicle exocytosis (GO:0099011)	5	1	0.11	+	8.9	0.125	1
malate-aspartate shuttle (GO:0043490)	5	1	0.11	+	8.9	0.125	1
negative regulation of heterochromatin assembly (GO:0031452)	5	1	0.11	+	8.9	0.125	1
negative regulation of immunoglobulin secretion (GO:0051025)	5	1	0.11	+	8.9	0.125	1
positive regulation of skeletal muscle tissue regeneration (GO:0043415)	5	1	0.11	+	8.9	0.125	1
regulation of excitatory synapse assembly (GO:1904889)	15	3	0.34	+	8.9	0.00673	0.238
ciliary neurotrophic factor-mediated signaling pathway (GO:0070120)	5	1	0.11	+	8.9	0.125	1
endothelial cell chemotaxis (GO:0035767)	10	2	0.22	+	8.9	0.0275	0.581
activation of MAPKKK activity (GO:0000185)	10	2	0.22	+	8.9	0.0275	0.58
regulation of kidney size (GO:0035564)	5	1	0.11	+	8.9	0.125	1
menaquinone metabolic process (GO:0009233)	5	1	0.11	+	8.9	0.125	1
regulation of renin secretion into blood stream (GO:1900133)	5	1	0.11	+	8.9	0.125	1
parkin-mediated stimulation of mitophagy in response to mitochondrial depolarization (GO:0061734)	5	1	0.11	+	8.9	0.125	1
positive regulation of Notch signaling pathway involved in heart induction (GO:0035481)	5	1	0.11	+	8.9	0.125	1
regulation of Notch signaling pathway involved in heart induction (GO:0035480)	5	1	0.11	+	8.9	0.125	1
penile erection (GO:0043084)	5	1	0.11	+	8.9	0.125	1
determination of pancreatic left/right asymmetry (GO:0035469)	5	1	0.11	+	8.9	0.125	1
purine ribonucleoside diphosphate catabolic process (GO:0009181)	5	1	0.11	+	8.9	0.125	1
purine nucleoside diphosphate catabolic process (GO:0009137)	5	1	0.11	+	8.9	0.125	1
xanthine catabolic process (GO:0009115)	5	1	0.11	+	8.9	0.125	1
negative regulation of SMAD protein complex assembly (GO:0010991)	5	1	0.11	+	8.9	0.125	1
attachment of GPI anchor to protein (GO:0016255)	5	1	0.11	+	8.9	0.125	1
chemoattraction of axon (GO:0061642)	5	1	0.11	+	8.9	0.125	1
citrate transport (GO:0015746)	5	1	0.11	+	8.9	0.125	1
positive regulation of saliva secretion (GO:0046878)	5	1	0.11	+	8.9	0.125	1
regulation of stress granule assembly (GO:0062028)	5	1	0.11	+	8.9	0.125	1
regulation of small intestine smooth muscle contraction (GO:1904347)	5	1	0.11	+	8.9	0.125	1
axon midline choice point recognition (GO:0016199)	5	1	0.11	+	8.9	0.125	1
negative regulation of sequestering of triglyceride (GO:0010891)	5	1	0.11	+	8.9	0.125	1
trigeminal ganglion development (GO:0061551)	5	1	0.11	+	8.9	0.125	1
cadmium ion transport (GO:0015691)	5	1	0.11	+	8.9	0.125	1
phylloquinone catabolic process (GO:0042376)	5	1	0.11	+	8.9	0.125	1
phylloquinone metabolic process (GO:0042374)	5	1	0.11	+	8.9	0.125	1
ubiquitin-dependent glycoprotein ERAD pathway (GO:0097466)	5	1	0.11	+	8.9	0.125	1
negative regulation of phospholipid metabolic process (GO:1903726)	5	1	0.11	+	8.9	0.125	1
coronary artery morphogenesis (GO:0060982)	10	2	0.22	+	8.9	0.0275	0.579
operant conditioning (GO:0035106)	5	1	0.11	+	8.9	0.125	1
cardiac vascular smooth muscle cell development (GO:0060948)	5	1	0.11	+	8.9	0.125	1
negative regulation of alkaline phosphatase activity (GO:0010693)	5	1	0.11	+	8.9	0.125	1
retinal blood vessel morphogenesis (GO:0061304)	5	1	0.11	+	8.9	0.125	1
omega-hydroxylase P450 pathway (GO:0097267)	5	1	0.11	+	8.9	0.125	1
tooth mineralization (GO:0034505)	15	3	0.34	+	8.9	0.00673	0.237
desmosome organization (GO:0002934)	10	2	0.22	+	8.9	0.0275	0.578
regulation of gap junction assembly (GO:1903596)	5	1	0.11	+	8.9	0.125	1
regulation of membrane tubulation (GO:1903525)	5	1	0.11	+	8.9	0.125	1
apical constriction (GO:0003383)	5	1	0.11	+	8.9	0.125	1
regulation of branching involved in mammary gland duct morphogenesis (GO:0060762)	5	1	0.11	+	8.9	0.125	1
response to muscle activity involved in regulation of muscle adaptation (GO:0014873)	5	1	0.11	+	8.9	0.125	1
cholesterol esterification (GO:0034435)	5	1	0.11	+	8.9	0.125	1
sterol esterification (GO:0034434)	5	1	0.11	+	8.9	0.125	1
steroid esterification (GO:0034433)	5	1	0.11	+	8.9	0.125	1
skeletal muscle satellite cell maintenance involved in skeletal muscle regeneration (GO:0014834)	5	1	0.11	+	8.9	0.125	1
gamma-aminobutyric acid receptor clustering (GO:0097112)	5	1	0.11	+	8.9	0.125	1
negative regulation of translational elongation (GO:0045900)	5	1	0.11	+	8.9	0.125	1
dichotomous subdivision of terminal units involved in salivary gland branching (GO:0060666)	5	1	0.11	+	8.9	0.125	1
regulation of branching involved in salivary gland morphogenesis by mesenchymal-epithelial signaling (GO:0060665)	5	1	0.11	+	8.9	0.125	1
negative regulation of dendritic spine maintenance (GO:1902951)	5	1	0.11	+	8.9	0.125	1
skeletal muscle satellite cell activation (GO:0014719)	5	1	0.11	+	8.9	0.125	1
regulation of adherens junction organization (GO:1903391)	5	1	0.11	+	8.9	0.125	1
hypothalamus cell migration (GO:0021855)	5	1	0.11	+	8.9	0.125	1
oxalate transport (GO:0019532)	5	1	0.11	+	8.9	0.125	1
positive regulation of secondary heart field cardioblast proliferation (GO:0072513)	5	1	0.11	+	8.9	0.125	1
regulation of synaptic vesicle transport (GO:1902803)	5	1	0.11	+	8.9	0.125	1
somatic recombination of T cell receptor gene segments (GO:0002681)	5	1	0.11	+	8.9	0.125	1
positive chemotaxis (GO:0050918)	21	4	0.47	+	8.48	0.00202	0.119
negative regulation of multicellular organism growth (GO:0040015)	16	3	0.36	+	8.35	0.00786	0.262
positive regulation of unsaturated fatty acid biosynthetic process (GO:2001280)	11	2	0.25	+	8.09	0.032	0.637
nervous system process involved in regulation of systemic arterial blood pressure (GO:0001976)	22	4	0.49	+	8.09	0.00235	0.133
glomerulus morphogenesis (GO:0072102)	11	2	0.25	+	8.09	0.032	0.637
aggressive behavior (GO:0002118)	11	2	0.25	+	8.09	0.032	0.636
response to angiotensin (GO:1990776)	22	4	0.49	+	8.09	0.00235	0.133
positive regulation of mitophagy (GO:1901526)	11	2	0.25	+	8.09	0.032	0.635
positive regulation of protein kinase C signaling (GO:0090037)	11	2	0.25	+	8.09	0.032	0.634
asymmetric stem cell division (GO:0098722)	11	2	0.25	+	8.09	0.032	0.633
behavioral response to ethanol (GO:0048149)	11	2	0.25	+	8.09	0.032	0.633
wound healing, spreading of epidermal cells (GO:0035313)	11	2	0.25	+	8.09	0.032	0.632
regulation of deacetylase activity (GO:0150065)	11	2	0.25	+	8.09	0.032	0.631
retina vasculature morphogenesis in camera-type eye (GO:0061299)	11	2	0.25	+	8.09	0.032	0.63
myelin assembly (GO:0032288)	23	4	0.52	+	7.74	0.00271	0.144
branchiomotor neuron axon guidance (GO:0021785)	6	1	0.13	+	7.42	0.144	1
negative regulation of cardiac muscle hypertrophy in response to stress (GO:1903243)	6	1	0.13	+	7.42	0.144	1
negative regulation of protein targeting to mitochondrion (GO:1903215)	6	1	0.13	+	7.42	0.144	1
renal control of peripheral vascular resistance involved in regulation of systemic arterial blood pressure (GO:0003072)	6	1	0.13	+	7.42	0.144	1
pyrimidine ribonucleoside catabolic process (GO:0046133)	6	1	0.13	+	7.42	0.144	1
pyrimidine ribonucleoside metabolic process (GO:0046131)	6	1	0.13	+	7.42	0.144	1
xanthine metabolic process (GO:0046110)	6	1	0.13	+	7.42	0.144	1
determination of liver left/right asymmetry (GO:0071910)	6	1	0.13	+	7.42	0.144	1
cerebellar granular layer morphogenesis (GO:0021683)	12	2	0.27	+	7.42	0.0368	0.685
vestibulocochlear nerve morphogenesis (GO:0021648)	6	1	0.13	+	7.42	0.144	1
negative regulation of dopamine secretion (GO:0033602)	6	1	0.13	+	7.42	0.144	1
optic nerve morphogenesis (GO:0021631)	6	1	0.13	+	7.42	0.144	1
regulation of membrane hyperpolarization (GO:1902630)	6	1	0.13	+	7.42	0.144	1
glutamine transport (GO:0006868)	6	1	0.13	+	7.42	0.144	1
purine ribonucleoside bisphosphate metabolic process (GO:0034035)	6	1	0.13	+	7.42	0.144	1
retinal rod cell differentiation (GO:0060221)	18	3	0.4	+	7.42	0.0104	0.317
response to tumor cell (GO:0002347)	6	1	0.13	+	7.42	0.144	1
B cell lineage commitment (GO:0002326)	6	1	0.13	+	7.42	0.144	1
glomerular capillary formation (GO:0072104)	6	1	0.13	+	7.42	0.144	1
glomerulus vasculature morphogenesis (GO:0072103)	6	1	0.13	+	7.42	0.144	1
TORC2 signaling (GO:0038203)	6	1	0.13	+	7.42	0.144	1
positive regulation of MHC class I biosynthetic process (GO:0045345)	6	1	0.13	+	7.42	0.144	1
negative regulation of skeletal muscle cell differentiation (GO:2001015)	6	1	0.13	+	7.42	0.144	1
oviduct development (GO:0060066)	6	1	0.13	+	7.42	0.144	1
regulation of low-density lipoprotein particle receptor catabolic process (GO:0032803)	6	1	0.13	+	7.42	0.144	1
regulation of catecholamine uptake involved in synaptic transmission (GO:0051940)	6	1	0.13	+	7.42	0.144	1
positive regulation of cAMP-dependent protein kinase activity (GO:2000481)	6	1	0.13	+	7.42	0.144	1
apoptotic process involved in blood vessel morphogenesis (GO:1902262)	6	1	0.13	+	7.42	0.144	1
negative regulation of T cell migration (GO:2000405)	6	1	0.13	+	7.42	0.144	1
positive regulation of endothelial cell chemotaxis by VEGF-activated vascular endothelial growth factor receptor signaling pathway (GO:0038033)	6	1	0.13	+	7.42	0.144	1
dorsal root ganglion development (GO:1990791)	6	1	0.13	+	7.42	0.144	1
regulation of blood vessel diameter by renin-angiotensin (GO:0002034)	6	1	0.13	+	7.42	0.144	1
calcineurin-NFAT signaling cascade (GO:0033173)	12	2	0.27	+	7.42	0.0368	0.684
interleukin-10 production (GO:0032613)	6	1	0.13	+	7.42	0.144	1
medium-chain fatty acid biosynthetic process (GO:0051792)	6	1	0.13	+	7.42	0.144	1
negative regulation of peptidyl-cysteine S-nitrosylation (GO:1902083)	6	1	0.13	+	7.42	0.144	1
regulation of NADP metabolic process (GO:1902031)	6	1	0.13	+	7.42	0.144	1
negative regulation of excitatory postsynaptic potential (GO:0090394)	12	2	0.27	+	7.42	0.0368	0.683
regulation of mitophagy (GO:1901524)	18	3	0.4	+	7.42	0.0104	0.316
icosanoid catabolic process (GO:1901523)	6	1	0.13	+	7.42	0.144	1
regulation of Cdc42 protein signal transduction (GO:0032489)	6	1	0.13	+	7.42	0.144	1
regulation of dopamine uptake involved in synaptic transmission (GO:0051584)	6	1	0.13	+	7.42	0.144	1
negative regulation of synaptic plasticity (GO:0031914)	6	1	0.13	+	7.42	0.144	1
oxygen homeostasis (GO:0032364)	6	1	0.13	+	7.42	0.144	1
fructose 2,6-bisphosphate metabolic process (GO:0006003)	6	1	0.13	+	7.42	0.144	1
microtubule nucleation by interphase microtubule organizing center (GO:0051415)	6	1	0.13	+	7.42	0.144	1
cellular sphingolipid homeostasis (GO:0090156)	6	1	0.13	+	7.42	0.144	1
negative regulation of sphingolipid biosynthetic process (GO:0090155)	6	1	0.13	+	7.42	0.144	1
regulation of axon extension involved in regeneration (GO:0048690)	6	1	0.13	+	7.42	0.144	1
positive regulation of skeletal muscle tissue growth (GO:0048633)	6	1	0.13	+	7.42	0.144	1
activation of store-operated calcium channel activity (GO:0032237)	6	1	0.13	+	7.42	0.144	1
regulation of tubulin deacetylation (GO:0090043)	12	2	0.27	+	7.42	0.0368	0.682
positive regulation of vascular endothelial growth factor signaling pathway (GO:1900748)	6	1	0.13	+	7.42	0.144	1
dopaminergic neuron axon guidance (GO:0036514)	6	1	0.13	+	7.42	0.144	1
positive regulation of trophoblast cell migration (GO:1901165)	6	1	0.13	+	7.42	0.144	1
regulation of inositol 1,4,5-trisphosphate-sensitive calcium-release channel activity (GO:0031585)	6	1	0.13	+	7.42	0.144	1
positive regulation of NK T cell differentiation (GO:0051138)	6	1	0.13	+	7.42	0.144	1
planar cell polarity pathway involved in axon guidance (GO:1904938)	6	1	0.13	+	7.42	0.144	1
regulation of macrophage proliferation (GO:0120040)	6	1	0.13	+	7.42	0.144	1
negative regulation of chemokine-mediated signaling pathway (GO:0070100)	6	1	0.13	+	7.42	0.144	1
alkanesulfonate transport (GO:0042918)	6	1	0.13	+	7.42	0.144	1
regulation of memory T cell differentiation (GO:0043380)	6	1	0.13	+	7.42	0.144	1
pyruvate biosynthetic process (GO:0042866)	6	1	0.13	+	7.42	0.144	1
negative regulation of purine nucleotide biosynthetic process (GO:1900372)	6	1	0.13	+	7.42	0.144	1
3'-phosphoadenosine 5'-phosphosulfate metabolic process (GO:0050427)	6	1	0.13	+	7.42	0.144	1
negative regulation of nucleotide biosynthetic process (GO:0030809)	6	1	0.13	+	7.42	0.144	1
regulation of metalloendopeptidase activity (GO:1904683)	6	1	0.13	+	7.42	0.144	1
circadian sleep/wake cycle (GO:0042745)	6	1	0.13	+	7.42	0.144	1
osteoclast development (GO:0036035)	6	1	0.13	+	7.42	0.144	1
positive regulation of synaptic vesicle endocytosis (GO:1900244)	12	2	0.27	+	7.42	0.0368	0.681
negative regulation of metallopeptidase activity (GO:1905049)	6	1	0.13	+	7.42	0.144	1
oxidative DNA demethylation (GO:0035511)	6	1	0.13	+	7.42	0.144	1
negative regulation of myosin-light-chain-phosphatase activity (GO:0035509)	6	1	0.13	+	7.42	0.144	1
regulation of axon diameter (GO:0031133)	6	1	0.13	+	7.42	0.144	1
cyclic nucleotide catabolic process (GO:0009214)	6	1	0.13	+	7.42	0.144	1
response to glycoprotein (GO:1904587)	6	1	0.13	+	7.42	0.144	1
nuclear-transcribed mRNA catabolic process, deadenylation-independent decay (GO:0031086)	6	1	0.13	+	7.42	0.144	1
urea transport (GO:0015840)	6	1	0.13	+	7.42	0.144	1
histone-threonine phosphorylation (GO:0035405)	6	1	0.13	+	7.42	0.144	1
regulation of hemoglobin biosynthetic process (GO:0046984)	6	1	0.13	+	7.42	0.144	1
G protein-coupled receptor signaling pathway involved in heart process (GO:0086103)	6	1	0.13	+	7.42	0.144	1
double-strand break repair via classical nonhomologous end joining (GO:0097680)	6	1	0.13	+	7.42	0.144	1
ubiquitin-dependent SMAD protein catabolic process (GO:0030579)	6	1	0.13	+	7.42	0.144	1
regulation of SMAD protein complex assembly (GO:0010990)	6	1	0.13	+	7.42	0.144	1
positive regulation of peptidyl-tyrosine autophosphorylation (GO:1900086)	6	1	0.13	+	7.42	0.144	1
negative regulation of ruffle assembly (GO:1900028)	6	1	0.13	+	7.42	0.144	1
Roundabout signaling pathway (GO:0035385)	6	1	0.13	+	7.42	0.144	1
taurine transport (GO:0015734)	6	1	0.13	+	7.42	0.144	1
mast cell migration (GO:0097531)	6	1	0.13	+	7.42	0.144	1
regulation of cholesterol esterification (GO:0010872)	12	2	0.27	+	7.42	0.0368	0.681
bradykinin catabolic process (GO:0010815)	6	1	0.13	+	7.42	0.144	1
cranial ganglion development (GO:0061550)	6	1	0.13	+	7.42	0.144	1
regulation of nitric oxide mediated signal transduction (GO:0010749)	12	2	0.27	+	7.42	0.0368	0.68
positive regulation of transcription from RNA polymerase II promoter in response to hypoxia (GO:0061419)	6	1	0.13	+	7.42	0.144	1
embryonic heart tube left/right pattern formation (GO:0060971)	6	1	0.13	+	7.42	0.144	1
negative regulation of membrane depolarization (GO:1904180)	6	1	0.13	+	7.42	0.144	1
regulation of wound healing, spreading of epidermal cells (GO:1903689)	6	1	0.13	+	7.42	0.144	1
neural plate pattern specification (GO:0060896)	6	1	0.13	+	7.42	0.144	1
saliva secretion (GO:0046541)	6	1	0.13	+	7.42	0.144	1
positive regulation of platelet activation (GO:0010572)	6	1	0.13	+	7.42	0.144	1
glycosylceramide biosynthetic process (GO:0046476)	6	1	0.13	+	7.42	0.144	1
urinary bladder smooth muscle contraction (GO:0014832)	12	2	0.27	+	7.42	0.0368	0.679
vascular associated smooth muscle contraction (GO:0014829)	18	3	0.4	+	7.42	0.0104	0.315
negative regulation of T-helper 1 type immune response (GO:0002826)	6	1	0.13	+	7.42	0.144	1
positive regulation of female receptivity (GO:0045925)	6	1	0.13	+	7.42	0.144	1
ureteric bud elongation (GO:0060677)	6	1	0.13	+	7.42	0.144	1
negative regulation of anion channel activity (GO:0010360)	6	1	0.13	+	7.42	0.144	1
vascular wound healing (GO:0061042)	6	1	0.13	+	7.42	0.144	1
uterus morphogenesis (GO:0061038)	6	1	0.13	+	7.42	0.144	1
mesodermal cell fate specification (GO:0007501)	6	1	0.13	+	7.42	0.144	1
regulation of systemic arterial blood pressure by endothelin (GO:0003100)	6	1	0.13	+	7.42	0.144	1
negative regulation of syncytium formation by plasma membrane fusion (GO:0034242)	6	1	0.13	+	7.42	0.144	1
positive regulation of focal adhesion assembly (GO:0051894)	25	4	0.56	+	7.12	0.00354	0.167
muscle cell proliferation (GO:0033002)	25	4	0.56	+	7.12	0.00354	0.166
regulation of platelet-derived growth factor receptor signaling pathway (GO:0010640)	25	4	0.56	+	7.12	0.00354	0.166
regulation of mammary gland epithelial cell proliferation (GO:0033599)	19	3	0.43	+	7.03	0.0119	0.345
positive regulation of actin cytoskeleton reorganization (GO:2000251)	19	3	0.43	+	7.03	0.0119	0.344
regulation of ARF protein signal transduction (GO:0032012)	19	3	0.43	+	7.03	0.0119	0.343
peptide hormone processing (GO:0016486)	19	3	0.43	+	7.03	0.0119	0.343
positive regulation of epidermal growth factor receptor signaling pathway (GO:0045742)	32	5	0.72	+	6.95	0.00122	0.0855
positive regulation of epidermal growth factor-activated receptor activity (GO:0045741)	13	2	0.29	+	6.85	0.0419	0.749
negative regulation of pathway-restricted SMAD protein phosphorylation (GO:0060394)	13	2	0.29	+	6.85	0.0419	0.748
cranial nerve structural organization (GO:0021604)	13	2	0.29	+	6.85	0.0419	0.747
ER-associated misfolded protein catabolic process (GO:0071712)	13	2	0.29	+	6.85	0.0419	0.746
commissural neuron axon guidance (GO:0071679)	13	2	0.29	+	6.85	0.0419	0.745
collecting duct development (GO:0072044)	13	2	0.29	+	6.85	0.0419	0.744
signal peptide processing (GO:0006465)	13	2	0.29	+	6.85	0.0419	0.744
apical protein localization (GO:0045176)	13	2	0.29	+	6.85	0.0419	0.743
neuronal ion channel clustering (GO:0045161)	13	2	0.29	+	6.85	0.0419	0.742
histone H3-K9 methylation (GO:0051567)	13	2	0.29	+	6.85	0.0419	0.741
regulation of extracellular matrix assembly (GO:1901201)	13	2	0.29	+	6.85	0.0419	0.74
skin morphogenesis (GO:0043589)	13	2	0.29	+	6.85	0.0419	0.739
bone trabecula morphogenesis (GO:0061430)	13	2	0.29	+	6.85	0.0419	0.739
positive regulation of cardiac muscle hypertrophy (GO:0010613)	39	6	0.88	+	6.85	0.00043	0.0449
regulation of anion channel activity (GO:0010359)	13	2	0.29	+	6.85	0.0419	0.738
regulation of axon extension involved in axon guidance (GO:0048841)	33	5	0.74	+	6.74	0.00138	0.0915
adenylate cyclase-activating adrenergic receptor signaling pathway (GO:0071880)	20	3	0.45	+	6.68	0.0135	0.376
cell-cell junction maintenance (GO:0045217)	20	3	0.45	+	6.68	0.0135	0.375
mitochondrion distribution (GO:0048311)	20	3	0.45	+	6.68	0.0135	0.374
amelogenesis (GO:0097186)	20	3	0.45	+	6.68	0.0135	0.374
negative regulation of smooth muscle contraction (GO:0045986)	20	3	0.45	+	6.68	0.0135	0.373
positive regulation of muscle hypertrophy (GO:0014742)	40	6	0.9	+	6.68	0.000485	0.0485
negative regulation of axon extension involved in axon guidance (GO:0048843)	27	4	0.61	+	6.59	0.00453	0.194
positive regulation of ERBB signaling pathway (GO:1901186)	34	5	0.76	+	6.55	0.00156	0.0989
protein hexamerization (GO:0034214)	7	1	0.16	+	6.36	0.163	1
negative regulation of cell volume (GO:0045794)	7	1	0.16	+	6.36	0.163	1
negative regulation of immunoglobulin production (GO:0002638)	14	2	0.31	+	6.36	0.0472	0.724
positive regulation of toll-like receptor 2 signaling pathway (GO:0034137)	7	1	0.16	+	6.36	0.163	1
determination of digestive tract left/right asymmetry (GO:0071907)	7	1	0.16	+	6.36	0.163	1
regulation of melanocyte differentiation (GO:0045634)	7	1	0.16	+	6.36	0.163	1
fatty acid elongation, unsaturated fatty acid (GO:0019368)	7	1	0.16	+	6.36	0.163	1
fatty acid elongation, saturated fatty acid (GO:0019367)	7	1	0.16	+	6.36	0.163	1
axonogenesis involved in innervation (GO:0060385)	7	1	0.16	+	6.36	0.163	1
regulation of aldosterone secretion (GO:2000858)	7	1	0.16	+	6.36	0.163	1
regulation of mineralocorticoid secretion (GO:2000855)	7	1	0.16	+	6.36	0.163	1
positive regulation of Fc receptor mediated stimulatory signaling pathway (GO:0060369)	7	1	0.16	+	6.36	0.163	1
germinal center formation (GO:0002467)	7	1	0.16	+	6.36	0.163	1
regulation of caveolin-mediated endocytosis (GO:2001286)	7	1	0.16	+	6.36	0.163	1
regulation of unsaturated fatty acid biosynthetic process (GO:2001279)	14	2	0.31	+	6.36	0.0472	0.724
positive regulation of podosome assembly (GO:0071803)	14	2	0.31	+	6.36	0.0472	0.723
regulation of protein lipidation (GO:1903059)	7	1	0.16	+	6.36	0.163	1
protein localization to membrane raft (GO:1903044)	7	1	0.16	+	6.36	0.163	1
neuronal action potential (GO:0019228)	35	5	0.79	+	6.36	0.00175	0.106
blood vessel maturation (GO:0001955)	7	1	0.16	+	6.36	0.163	1
primitive hemopoiesis (GO:0060215)	7	1	0.16	+	6.36	0.163	1
NADH regeneration (GO:0006735)	7	1	0.16	+	6.36	0.163	1
regulation of dendritic cell differentiation (GO:2001198)	7	1	0.16	+	6.36	0.163	1
negative regulation of type B pancreatic cell apoptotic process (GO:2000675)	7	1	0.16	+	6.36	0.163	1
positive regulation of receptor catabolic process (GO:2000646)	7	1	0.16	+	6.36	0.163	1
galactosylceramide metabolic process (GO:0006681)	7	1	0.16	+	6.36	0.163	1
regulation of MHC class I biosynthetic process (GO:0045343)	7	1	0.16	+	6.36	0.163	1
receptor-mediated endocytosis of virus by host cell (GO:0019065)	7	1	0.16	+	6.36	0.163	1
regulation of endothelial cell chemotaxis to fibroblast growth factor (GO:2000544)	7	1	0.16	+	6.36	0.163	1
positive regulation of gastrulation (GO:2000543)	7	1	0.16	+	6.36	0.163	1
regulation of cellular pH reduction (GO:0032847)	7	1	0.16	+	6.36	0.163	1
positive regulation of natural killer cell proliferation (GO:0032819)	7	1	0.16	+	6.36	0.163	1
negative regulation of cellular amine metabolic process (GO:0033239)	7	1	0.16	+	6.36	0.163	1
ribosome disassembly (GO:0032790)	7	1	0.16	+	6.36	0.163	1
cell migration involved in sprouting angiogenesis (GO:0002042)	21	3	0.47	+	6.36	0.0151	0.4
clustering of voltage-gated sodium channels (GO:0045162)	7	1	0.16	+	6.36	0.163	1
protein localization to endoplasmic reticulum exit site (GO:0070973)	7	1	0.16	+	6.36	0.163	1
regulation of cell projection size (GO:0032536)	14	2	0.31	+	6.36	0.0472	0.722
dense core granule exocytosis (GO:1990504)	7	1	0.16	+	6.36	0.163	1
negative regulation of cholesterol efflux (GO:0090370)	7	1	0.16	+	6.36	0.163	1
trans-synaptic signaling by endocannabinoid (GO:0099542)	7	1	0.16	+	6.36	0.163	1
trans-synaptic signaling by lipid (GO:0099541)	7	1	0.16	+	6.36	0.163	1
purine nucleobase catabolic process (GO:0006145)	7	1	0.16	+	6.36	0.163	1
negative regulation of fatty acid beta-oxidation (GO:0031999)	7	1	0.16	+	6.36	0.163	1
endocytosis involved in viral entry into host cell (GO:0075509)	7	1	0.16	+	6.36	0.163	1
regulation of lymphangiogenesis (GO:1901490)	7	1	0.16	+	6.36	0.163	1
neuron projection arborization (GO:0140058)	14	2	0.31	+	6.36	0.0472	0.722
macropinocytosis (GO:0044351)	7	1	0.16	+	6.36	0.163	1
neurotransmitter receptor transport, postsynaptic endosome to lysosome (GO:0098943)	7	1	0.16	+	6.36	0.163	1
anterograde dendritic transport (GO:0098937)	7	1	0.16	+	6.36	0.163	1
regulation of sprouting of injured axon (GO:0048686)	7	1	0.16	+	6.36	0.163	1
positive regulation of pigment cell differentiation (GO:0050942)	7	1	0.16	+	6.36	0.163	1
positive regulation of cell migration involved in sprouting angiogenesis (GO:0090050)	21	3	0.47	+	6.36	0.0151	0.399
circadian behavior (GO:0048512)	28	4	0.63	+	6.36	0.00509	0.199
protein heterotetramerization (GO:0051290)	14	2	0.31	+	6.36	0.0472	0.721
neural crest cell migration involved in autonomic nervous system development (GO:1901166)	7	1	0.16	+	6.36	0.163	1
negative regulation of fat cell proliferation (GO:0070345)	7	1	0.16	+	6.36	0.163	1
regulation of postsynaptic specialization assembly (GO:0099150)	14	2	0.31	+	6.36	0.0472	0.72
positive regulation of vascular associated smooth muscle cell apoptotic process (GO:1905461)	7	1	0.16	+	6.36	0.163	1
positive regulation of autophagosome maturation (GO:1901098)	7	1	0.16	+	6.36	0.163	1
regulation of Fc-gamma receptor signaling pathway involved in phagocytosis (GO:1905449)	7	1	0.16	+	6.36	0.163	1
regulation of cell chemotaxis to fibroblast growth factor (GO:1904847)	7	1	0.16	+	6.36	0.163	1
interleukin-6-mediated signaling pathway (GO:0070102)	14	2	0.31	+	6.36	0.0472	0.72
paranodal junction assembly (GO:0030913)	7	1	0.16	+	6.36	0.163	1
regulation of chemokine-mediated signaling pathway (GO:0070099)	7	1	0.16	+	6.36	0.163	1
rDNA heterochromatin assembly (GO:0000183)	7	1	0.16	+	6.36	0.163	1
oligosaccharide biosynthetic process (GO:0009312)	14	2	0.31	+	6.36	0.0472	0.719
very long-chain fatty acid catabolic process (GO:0042760)	7	1	0.16	+	6.36	0.163	1
positive regulation of amyloid-beta clearance (GO:1900223)	7	1	0.16	+	6.36	0.163	1
cellular response to macrophage colony-stimulating factor stimulus (GO:0036006)	7	1	0.16	+	6.36	0.163	1
response to macrophage colony-stimulating factor (GO:0036005)	7	1	0.16	+	6.36	0.163	1
glucose catabolic process to pyruvate (GO:0061718)	7	1	0.16	+	6.36	0.163	1
cardiac muscle tissue growth (GO:0055017)	35	5	0.79	+	6.36	0.00175	0.106
regulation of peptidyl-tyrosine autophosphorylation (GO:1900084)	7	1	0.16	+	6.36	0.163	1
positive regulation of microglial cell activation (GO:1903980)	7	1	0.16	+	6.36	0.163	1
canonical glycolysis (GO:0061621)	7	1	0.16	+	6.36	0.163	1
succinate transport (GO:0015744)	7	1	0.16	+	6.36	0.163	1
prostaglandin transport (GO:0015732)	7	1	0.16	+	6.36	0.163	1
positive regulation of odontogenesis (GO:0042482)	7	1	0.16	+	6.36	0.163	1
protein localization to cell-cell junction (GO:0150105)	21	3	0.47	+	6.36	0.0151	0.398
axon choice point recognition (GO:0016198)	7	1	0.16	+	6.36	0.163	1
miRNA loading onto RISC involved in gene silencing by miRNA (GO:0035280)	7	1	0.16	+	6.36	0.163	1
regulation of iron ion transmembrane transport (GO:0034759)	7	1	0.16	+	6.36	0.163	1
negative regulation of hydrogen peroxide metabolic process (GO:0010727)	7	1	0.16	+	6.36	0.163	1
fatty acid elongation, polyunsaturated fatty acid (GO:0034626)	7	1	0.16	+	6.36	0.163	1
fatty acid elongation, monounsaturated fatty acid (GO:0034625)	7	1	0.16	+	6.36	0.163	1
negative regulation of cardiac muscle adaptation (GO:0010616)	7	1	0.16	+	6.36	0.163	1
smoothened signaling pathway involved in dorsal/ventral neural tube patterning (GO:0060831)	7	1	0.16	+	6.36	0.163	1
regulation of activation of Janus kinase activity (GO:0010533)	7	1	0.16	+	6.36	0.163	1
mammary duct terminal end bud growth (GO:0060763)	7	1	0.16	+	6.36	0.163	1
glyoxylate metabolic process (GO:0046487)	7	1	0.16	+	6.36	0.163	1
positive regulation of mast cell chemotaxis (GO:0060754)	7	1	0.16	+	6.36	0.163	1
muscle atrophy (GO:0014889)	7	1	0.16	+	6.36	0.163	1
response to muscle activity (GO:0014850)	14	2	0.31	+	6.36	0.0472	0.718
positive regulation of dopamine metabolic process (GO:0045964)	7	1	0.16	+	6.36	0.163	1
alkanesulfonate metabolic process (GO:0019694)	7	1	0.16	+	6.36	0.163	1
negative regulation of complement activation (GO:0045916)	7	1	0.16	+	6.36	0.163	1
positive regulation of catecholamine metabolic process (GO:0045915)	7	1	0.16	+	6.36	0.163	1
very-low-density lipoprotein particle remodeling (GO:0034372)	7	1	0.16	+	6.36	0.163	1
negative regulation of autophagosome assembly (GO:1902902)	14	2	0.31	+	6.36	0.0472	0.717
taurine metabolic process (GO:0019530)	7	1	0.16	+	6.36	0.163	1
cerebral cortex tangential migration (GO:0021800)	7	1	0.16	+	6.36	0.163	1
epidermal growth factor receptor signaling pathway (GO:0007173)	43	6	0.97	+	6.21	0.000686	0.0598
negative regulation of systemic arterial blood pressure (GO:0003085)	29	4	0.65	+	6.14	0.00569	0.215
positive regulation of cellular response to insulin stimulus (GO:1900078)	29	4	0.65	+	6.14	0.00569	0.215
positive regulation of Notch signaling pathway (GO:0045747)	44	6	0.99	+	6.07	0.000765	0.0632
adrenergic receptor signaling pathway (GO:0071875)	22	3	0.49	+	6.07	0.0169	0.422
signaling receptor ligand precursor processing (GO:0140448)	22	3	0.49	+	6.07	0.0169	0.422
positive regulation of nitric-oxide synthase biosynthetic process (GO:0051770)	22	3	0.49	+	6.07	0.0169	0.421
positive regulation of myelination (GO:0031643)	22	3	0.49	+	6.07	0.0169	0.42
lymphangiogenesis (GO:0001946)	15	2	0.34	+	5.93	0.0527	0.777
inositol phosphate biosynthetic process (GO:0032958)	15	2	0.34	+	5.93	0.0527	0.776
axo-dendritic protein transport (GO:0099640)	15	2	0.34	+	5.93	0.0527	0.775
induction of positive chemotaxis (GO:0050930)	15	2	0.34	+	5.93	0.0527	0.775
secretory granule localization (GO:0032252)	15	2	0.34	+	5.93	0.0527	0.774
calcineurin-mediated signaling (GO:0097720)	15	2	0.34	+	5.93	0.0527	0.773
regulation of amino acid import across plasma membrane (GO:0010958)	15	2	0.34	+	5.93	0.0527	0.773
histone H3-K9 modification (GO:0061647)	15	2	0.34	+	5.93	0.0527	0.772
positive regulation of cell-substrate junction organization (GO:0150117)	30	4	0.67	+	5.93	0.00634	0.229
regulation of amino acid transmembrane transport (GO:1903789)	15	2	0.34	+	5.93	0.0527	0.771
one-carbon compound transport (GO:0019755)	15	2	0.34	+	5.93	0.0527	0.77
urinary tract smooth muscle contraction (GO:0014848)	15	2	0.34	+	5.93	0.0527	0.77
positive regulation of synaptic vesicle recycling (GO:1903423)	15	2	0.34	+	5.93	0.0527	0.769
rhythmic behavior (GO:0007622)	30	4	0.67	+	5.93	0.00634	0.229
excretion (GO:0007588)	30	4	0.67	+	5.93	0.00634	0.228
heart growth (GO:0060419)	38	5	0.85	+	5.86	0.00243	0.135
semaphorin-plexin signaling pathway (GO:0071526)	38	5	0.85	+	5.86	0.00243	0.135
vasoconstriction (GO:0042310)	38	5	0.85	+	5.86	0.00243	0.134
activation of protein kinase B activity (GO:0032148)	23	3	0.52	+	5.81	0.0188	0.459
C4-dicarboxylate transport (GO:0015740)	23	3	0.52	+	5.81	0.0188	0.458
regulation of the force of heart contraction (GO:0002026)	31	4	0.7	+	5.74	0.00703	0.241
central nervous system myelination (GO:0022010)	24	3	0.54	+	5.56	0.0209	0.497
ERBB signaling pathway (GO:0038127)	48	6	1.08	+	5.56	0.00115	0.0821
regulation of neuron projection regeneration (GO:0070570)	40	5	0.9	+	5.56	0.00297	0.151
axon ensheathment in central nervous system (GO:0032291)	24	3	0.54	+	5.56	0.0209	0.496
positive regulation of behavioral fear response (GO:2000987)	8	1	0.18	+	5.56	0.181	1
pyrimidine nucleoside catabolic process (GO:0046135)	8	1	0.18	+	5.56	0.181	1
negative regulation of toll-like receptor 4 signaling pathway (GO:0034144)	8	1	0.18	+	5.56	0.181	1
substrate-dependent cell migration, cell extension (GO:0006930)	8	1	0.18	+	5.56	0.181	1
cerebellar granular layer development (GO:0021681)	16	2	0.36	+	5.56	0.0585	0.824
galactolipid metabolic process (GO:0019374)	8	1	0.18	+	5.56	0.181	1
positive regulation of mammary gland epithelial cell proliferation (GO:0033601)	8	1	0.18	+	5.56	0.181	1
endosomal vesicle fusion (GO:0034058)	8	1	0.18	+	5.56	0.181	1
drug transmembrane transport (GO:0006855)	8	1	0.18	+	5.56	0.181	1
negative regulation of cytoplasmic translation (GO:2000766)	8	1	0.18	+	5.56	0.181	1
glucocorticoid biosynthetic process (GO:0006704)	8	1	0.18	+	5.56	0.181	1
gas homeostasis (GO:0033483)	8	1	0.18	+	5.56	0.181	1
inner cell mass cell differentiation (GO:0001826)	8	1	0.18	+	5.56	0.181	1
regulation of genetic imprinting (GO:2000653)	8	1	0.18	+	5.56	0.181	1
sphingomyelin biosynthetic process (GO:0006686)	8	1	0.18	+	5.56	0.181	1
relaxation of vascular associated smooth muscle (GO:0060087)	8	1	0.18	+	5.56	0.181	1
tubulin complex assembly (GO:0007021)	8	1	0.18	+	5.56	0.181	1
positive regulation of epithelial cell proliferation involved in wound healing (GO:0060054)	8	1	0.18	+	5.56	0.181	1
convergent extension involved in gastrulation (GO:0060027)	8	1	0.18	+	5.56	0.181	1
positive regulation of cell migration by vascular endothelial growth factor signaling pathway (GO:0038089)	8	1	0.18	+	5.56	0.181	1
pre-replicative complex assembly involved in cell cycle DNA replication (GO:1902299)	8	1	0.18	+	5.56	0.181	1
neuron projection extension involved in neuron projection guidance (GO:1902284)	8	1	0.18	+	5.56	0.181	1
p38MAPK cascade (GO:0038066)	8	1	0.18	+	5.56	0.181	1
regulation of cardioblast differentiation (GO:0051890)	8	1	0.18	+	5.56	0.181	1
cellular response to hydroperoxide (GO:0071447)	8	1	0.18	+	5.56	0.181	1
cellular response to histamine (GO:0071420)	8	1	0.18	+	5.56	0.181	1
brain renin-angiotensin system (GO:0002035)	8	1	0.18	+	5.56	0.181	1
immunoglobulin V(D)J recombination (GO:0033152)	8	1	0.18	+	5.56	0.181	1
regulation of ovarian follicle development (GO:2000354)	8	1	0.18	+	5.56	0.181	1
skeletal muscle acetylcholine-gated channel clustering (GO:0071340)	8	1	0.18	+	5.56	0.181	1
negative regulation of mast cell activation involved in immune response (GO:0033007)	8	1	0.18	+	5.56	0.181	1
anterograde axonal protein transport (GO:0099641)	8	1	0.18	+	5.56	0.181	1
regulation of microvillus assembly (GO:0032534)	8	1	0.18	+	5.56	0.181	1
pre-replicative complex assembly involved in nuclear cell cycle DNA replication (GO:0006267)	8	1	0.18	+	5.56	0.181	1
fatty acid transmembrane transport (GO:1902001)	8	1	0.18	+	5.56	0.181	1
endoplasmic reticulum localization (GO:0051643)	8	1	0.18	+	5.56	0.181	1
regulation of amyloid fibril formation (GO:1905906)	8	1	0.18	+	5.56	0.181	1
axon extension involved in axon guidance (GO:0048846)	8	1	0.18	+	5.56	0.181	1
response to interleukin-15 (GO:0070672)	8	1	0.18	+	5.56	0.181	1
semicircular canal morphogenesis (GO:0048752)	8	1	0.18	+	5.56	0.181	1
regulation of intracellular cholesterol transport (GO:0032383)	8	1	0.18	+	5.56	0.181	1
regulation of intracellular sterol transport (GO:0032380)	8	1	0.18	+	5.56	0.181	1
regulation of intracellular lipid transport (GO:0032377)	8	1	0.18	+	5.56	0.181	1
galactose metabolic process (GO:0006012)	8	1	0.18	+	5.56	0.181	1
positive regulation of store-operated calcium channel activity (GO:1901341)	8	1	0.18	+	5.56	0.181	1
positive regulation of neuron projection regeneration (GO:0070572)	16	2	0.36	+	5.56	0.0585	0.823
epithelial cell-cell adhesion (GO:0090136)	16	2	0.36	+	5.56	0.0585	0.822
detection of calcium ion (GO:0005513)	8	1	0.18	+	5.56	0.181	1
thermoception (GO:0050955)	8	1	0.18	+	5.56	0.181	1
regulation of skeletal muscle tissue growth (GO:0048631)	8	1	0.18	+	5.56	0.181	1
regulation of adenylate cyclase-activating G protein-coupled receptor signaling pathway (GO:0106070)	16	2	0.36	+	5.56	0.0585	0.822
diapedesis (GO:0050904)	8	1	0.18	+	5.56	0.181	1
neurotransmitter receptor transport, endosome to postsynaptic membrane (GO:0098887)	8	1	0.18	+	5.56	0.181	1
positive regulation of calcium ion import across plasma membrane (GO:1905665)	8	1	0.18	+	5.56	0.181	1
negative regulation of hydrogen peroxide-mediated programmed cell death (GO:1901299)	8	1	0.18	+	5.56	0.181	1
regulation of blood-brain barrier permeability (GO:1905603)	8	1	0.18	+	5.56	0.181	1
engulfment of apoptotic cell (GO:0043652)	16	2	0.36	+	5.56	0.0585	0.821
regulation of NK T cell differentiation (GO:0051136)	8	1	0.18	+	5.56	0.181	1
negative regulation of mitochondrial outer membrane permeabilization involved in apoptotic signaling pathway (GO:1901029)	8	1	0.18	+	5.56	0.181	1
pre-replicative complex assembly (GO:0036388)	8	1	0.18	+	5.56	0.181	1
regulation of activation-induced cell death of T cells (GO:0070235)	8	1	0.18	+	5.56	0.181	1
intermembrane lipid transfer (GO:0120009)	8	1	0.18	+	5.56	0.181	1
protein localization to presynapse (GO:1905383)	8	1	0.18	+	5.56	0.181	1
cellular response to potassium ion (GO:0035865)	8	1	0.18	+	5.56	0.181	1
response to potassium ion (GO:0035864)	8	1	0.18	+	5.56	0.181	1
cellular response to hepatocyte growth factor stimulus (GO:0035729)	16	2	0.36	+	5.56	0.0585	0.82
positive regulation of long-term neuronal synaptic plasticity (GO:0048170)	8	1	0.18	+	5.56	0.181	1
membrane protein intracellular domain proteolysis (GO:0031293)	8	1	0.18	+	5.56	0.181	1
positive regulation of developmental pigmentation (GO:0048087)	8	1	0.18	+	5.56	0.181	1
negative regulation of transcription by RNA polymerase I (GO:0016479)	8	1	0.18	+	5.56	0.181	1
regulation of cytoplasmic translational elongation (GO:1900247)	8	1	0.18	+	5.56	0.181	1
sulfur amino acid catabolic process (GO:0000098)	8	1	0.18	+	5.56	0.181	1
regulation of metallopeptidase activity (GO:1905048)	16	2	0.36	+	5.56	0.0585	0.82
regulation of myosin-light-chain-phosphatase activity (GO:0035507)	8	1	0.18	+	5.56	0.181	1
fatty acid homeostasis (GO:0055089)	16	2	0.36	+	5.56	0.0585	0.819
potassium ion export across plasma membrane (GO:0097623)	16	2	0.36	+	5.56	0.0585	0.818
detoxification of inorganic compound (GO:0061687)	8	1	0.18	+	5.56	0.181	1
positive regulation of protein kinase C activity (GO:1900020)	8	1	0.18	+	5.56	0.181	1
regulation of protein kinase C activity (GO:1900019)	8	1	0.18	+	5.56	0.181	1
regulation of phosphatidylcholine metabolic process (GO:0150172)	8	1	0.18	+	5.56	0.181	1
regulation of skeletal muscle acetylcholine-gated channel clustering (GO:1904393)	8	1	0.18	+	5.56	0.181	1
outer ear morphogenesis (GO:0042473)	8	1	0.18	+	5.56	0.181	1
photoreceptor cell morphogenesis (GO:0008594)	8	1	0.18	+	5.56	0.181	1
negative regulation of cholesterol storage (GO:0010887)	8	1	0.18	+	5.56	0.181	1
stress response to metal ion (GO:0097501)	8	1	0.18	+	5.56	0.181	1
microglial cell proliferation (GO:0061518)	8	1	0.18	+	5.56	0.181	1
macrophage proliferation (GO:0061517)	8	1	0.18	+	5.56	0.181	1
positive regulation of neuroinflammatory response (GO:0150078)	8	1	0.18	+	5.56	0.181	1
histone H4-K20 methylation (GO:0034770)	8	1	0.18	+	5.56	0.181	1
vitamin K metabolic process (GO:0042373)	8	1	0.18	+	5.56	0.181	1
regulation of inorganic anion transmembrane transport (GO:1903795)	8	1	0.18	+	5.56	0.181	1
vasculogenesis involved in coronary vascular morphogenesis (GO:0060979)	16	2	0.36	+	5.56	0.0585	0.817
negative regulation of mitochondrial fusion (GO:0010637)	8	1	0.18	+	5.56	0.181	1
peptide cross-linking via chondroitin 4-sulfate glycosaminoglycan (GO:0019800)	8	1	0.18	+	5.56	0.181	1
RNA secondary structure unwinding (GO:0010501)	8	1	0.18	+	5.56	0.181	1
regulation of protein localization to cilium (GO:1903564)	8	1	0.18	+	5.56	0.181	1
regulation of mast cell chemotaxis (GO:0060753)	8	1	0.18	+	5.56	0.181	1
regulation of extracellular matrix constituent secretion (GO:0003330)	8	1	0.18	+	5.56	0.181	1
hypothalamus cell differentiation (GO:0021979)	8	1	0.18	+	5.56	0.181	1
positive regulation of protein localization to early endosome (GO:1902966)	8	1	0.18	+	5.56	0.181	1
regulation of protein localization to early endosome (GO:1902965)	8	1	0.18	+	5.56	0.181	1
triglyceride-rich lipoprotein particle remodeling (GO:0034370)	8	1	0.18	+	5.56	0.181	1
positive regulation of fear response (GO:1903367)	8	1	0.18	+	5.56	0.181	1
trachea cartilage development (GO:0060534)	8	1	0.18	+	5.56	0.181	1
platelet-derived growth factor receptor signaling pathway (GO:0048008)	41	5	0.92	+	5.43	0.00328	0.158
transmission of nerve impulse (GO:0019226)	66	8	1.48	+	5.4	0.000217	0.0272
negative regulation of hydrogen peroxide-induced cell death (GO:1903206)	25	3	0.56	+	5.34	0.023	0.533
reflex (GO:0060004)	25	3	0.56	+	5.34	0.023	0.532
negative regulation of response to reactive oxygen species (GO:1901032)	25	3	0.56	+	5.34	0.023	0.531
vascular endothelial growth factor receptor signaling pathway (GO:0048010)	25	3	0.56	+	5.34	0.023	0.53
negative regulation of Rho protein signal transduction (GO:0035024)	25	3	0.56	+	5.34	0.023	0.53
positive regulation of cell junction assembly (GO:1901890)	117	14	2.63	+	5.33	1.19e-06	0.000553
ovulation cycle process (GO:0022602)	42	5	0.94	+	5.3	0.0036	0.167
cardiac muscle cell proliferation (GO:0060038)	17	2	0.38	+	5.24	0.0644	0.881
negative regulation of focal adhesion assembly (GO:0051895)	17	2	0.38	+	5.24	0.0644	0.88
response to hydroperoxide (GO:0033194)	17	2	0.38	+	5.24	0.0644	0.88
response to progesterone (GO:0032570)	17	2	0.38	+	5.24	0.0644	0.879
protein N-linked glycosylation via asparagine (GO:0018279)	17	2	0.38	+	5.24	0.0644	0.878
positive regulation of lymphocyte chemotaxis (GO:0140131)	17	2	0.38	+	5.24	0.0644	0.877
establishment of melanosome localization (GO:0032401)	17	2	0.38	+	5.24	0.0644	0.876
regulation of cholesterol metabolic process (GO:0090181)	34	4	0.76	+	5.24	0.00942	0.298
negative regulation of cell-substrate junction organization (GO:0150118)	17	2	0.38	+	5.24	0.0644	0.876
positive regulation of protein export from nucleus (GO:0046827)	17	2	0.38	+	5.24	0.0644	0.875
ionotropic glutamate receptor signaling pathway (GO:0035235)	17	2	0.38	+	5.24	0.0644	0.874
asymmetric cell division (GO:0008356)	17	2	0.38	+	5.24	0.0644	0.873
positive regulation of cyclin-dependent protein serine/threonine kinase activity (GO:0045737)	26	3	0.58	+	5.14	0.0252	0.557
positive regulation of fatty acid biosynthetic process (GO:0045723)	26	3	0.58	+	5.14	0.0252	0.556
positive regulation of systemic arterial blood pressure (GO:0003084)	26	3	0.58	+	5.14	0.0252	0.555
negative regulation of tissue remodeling (GO:0034104)	26	3	0.58	+	5.14	0.0252	0.555
regulation of AMPA receptor activity (GO:2000311)	26	3	0.58	+	5.14	0.0252	0.554
positive regulation of positive chemotaxis (GO:0050927)	26	3	0.58	+	5.14	0.0252	0.553
regulation of long-term neuronal synaptic plasticity (GO:0048169)	35	4	0.79	+	5.09	0.0103	0.315
embryonic hindlimb morphogenesis (GO:0035116)	35	4	0.79	+	5.09	0.0103	0.314
regulation of postsynaptic membrane potential (GO:0060078)	62	7	1.39	+	5.03	0.000789	0.0646
regulation of cardiac muscle hypertrophy (GO:0010611)	71	8	1.6	+	5.02	0.000342	0.0385
positive regulation of synapse assembly (GO:0051965)	80	9	1.8	+	5.01	0.000149	0.0204
negative regulation of bone resorption (GO:0045779)	18	2	0.4	+	4.95	0.0706	0.855
positive regulation of tumor necrosis factor-mediated signaling pathway (GO:1903265)	9	1	0.2	+	4.95	0.199	1
regulation of cardiac muscle hypertrophy in response to stress (GO:1903242)	9	1	0.2	+	4.95	0.199	1
positive regulation of AMPA receptor activity (GO:2000969)	9	1	0.2	+	4.95	0.199	1
positive regulation of cardiac muscle contraction (GO:0060452)	9	1	0.2	+	4.95	0.199	1
lung vasculature development (GO:0060426)	9	1	0.2	+	4.95	0.199	1
nucleobase catabolic process (GO:0046113)	9	1	0.2	+	4.95	0.199	1
regulation of establishment of endothelial barrier (GO:1903140)	18	2	0.4	+	4.95	0.0706	0.854
bone trabecula formation (GO:0060346)	9	1	0.2	+	4.95	0.199	1
cGMP metabolic process (GO:0046068)	18	2	0.4	+	4.95	0.0706	0.853
cellular response to epinephrine stimulus (GO:0071872)	9	1	0.2	+	4.95	0.199	1
response to epinephrine (GO:0071871)	9	1	0.2	+	4.95	0.199	1
positive regulation of gamma-delta T cell differentiation (GO:0045588)	9	1	0.2	+	4.95	0.199	1
response to manganese ion (GO:0010042)	9	1	0.2	+	4.95	0.199	1
regulation of podosome assembly (GO:0071801)	18	2	0.4	+	4.95	0.0706	0.853
negative regulation of extracellular matrix organization (GO:1903054)	9	1	0.2	+	4.95	0.199	1
vestibulocochlear nerve development (GO:0021562)	9	1	0.2	+	4.95	0.199	1
regulation of autophagosome assembly (GO:2000785)	36	4	0.81	+	4.95	0.0113	0.336
epithelial cilium movement involved in determination of left/right asymmetry (GO:0060287)	9	1	0.2	+	4.95	0.199	1
multi-organism localization (GO:1902579)	9	1	0.2	+	4.95	0.199	1
phosphatidylglycerol biosynthetic process (GO:0006655)	9	1	0.2	+	4.95	0.199	1
diacylglycerol biosynthetic process (GO:0006651)	9	1	0.2	+	4.95	0.199	1
otic vesicle morphogenesis (GO:0071600)	9	1	0.2	+	4.95	0.199	1
dense core granule transport (GO:1901950)	9	1	0.2	+	4.95	0.199	1
metaphase/anaphase transition of mitotic cell cycle (GO:0007091)	9	1	0.2	+	4.95	0.199	1
estrous cycle (GO:0044849)	9	1	0.2	+	4.95	0.199	1
regulation of natural killer cell proliferation (GO:0032817)	9	1	0.2	+	4.95	0.199	1
store-operated calcium entry (GO:0002115)	9	1	0.2	+	4.95	0.199	1
establishment of pigment granule localization (GO:0051905)	18	2	0.4	+	4.95	0.0706	0.852
modulation of age-related behavioral decline (GO:0090647)	9	1	0.2	+	4.95	0.199	1
metaphase/anaphase transition of cell cycle (GO:0044784)	9	1	0.2	+	4.95	0.199	1
multi-organism transport (GO:0044766)	9	1	0.2	+	4.95	0.199	1
regulation of translational elongation (GO:0006448)	18	2	0.4	+	4.95	0.0706	0.851
small RNA loading onto RISC (GO:0070922)	9	1	0.2	+	4.95	0.199	1
interleukin-2 production (GO:0032623)	9	1	0.2	+	4.95	0.199	1
regulation of nitric-oxide synthase biosynthetic process (GO:0051769)	27	3	0.61	+	4.95	0.0276	0.58
calcium ion export (GO:1901660)	9	1	0.2	+	4.95	0.199	1
pyrimidine nucleotide-sugar transmembrane transport (GO:0090481)	9	1	0.2	+	4.95	0.199	1
protein transport within lipid bilayer (GO:0032594)	9	1	0.2	+	4.95	0.199	1
relaxation of smooth muscle (GO:0044557)	9	1	0.2	+	4.95	0.199	1
neurotransmitter receptor transport, endosome to plasma membrane (GO:0099639)	9	1	0.2	+	4.95	0.199	1
cardiac muscle cell membrane repolarization (GO:0099622)	9	1	0.2	+	4.95	0.199	1
protein O-linked glycosylation via threonine (GO:0018243)	9	1	0.2	+	4.95	0.199	1
regulation of endothelial cell development (GO:1901550)	18	2	0.4	+	4.95	0.0706	0.851
phosphatidylserine exposure on apoptotic cell surface (GO:0070782)	9	1	0.2	+	4.95	0.199	1
otolith development (GO:0048840)	9	1	0.2	+	4.95	0.199	1
regulation of branching morphogenesis of a nerve (GO:2000172)	9	1	0.2	+	4.95	0.199	1
peptidyl-asparagine modification (GO:0018196)	18	2	0.4	+	4.95	0.0706	0.85
dense core granule cytoskeletal transport (GO:0099519)	9	1	0.2	+	4.95	0.199	1
melanosome organization (GO:0032438)	18	2	0.4	+	4.95	0.0706	0.85
regulation of glutamine family amino acid metabolic process (GO:0000820)	9	1	0.2	+	4.95	0.199	1
dendrite arborization (GO:0140059)	9	1	0.2	+	4.95	0.199	1
cardiac muscle fiber development (GO:0048739)	9	1	0.2	+	4.95	0.199	1
negative regulation of cell-cell adhesion mediated by cadherin (GO:2000048)	9	1	0.2	+	4.95	0.199	1
regulation of aldosterone metabolic process (GO:0032344)	9	1	0.2	+	4.95	0.199	1
regulation of axon regeneration (GO:0048679)	36	4	0.81	+	4.95	0.0113	0.335
regulation of pigment cell differentiation (GO:0050932)	9	1	0.2	+	4.95	0.199	1
regulation of positive chemotaxis (GO:0050926)	27	3	0.61	+	4.95	0.0276	0.579
dense core granule localization (GO:0032253)	9	1	0.2	+	4.95	0.199	1
positive regulation of synaptic transmission, GABAergic (GO:0032230)	18	2	0.4	+	4.95	0.0706	0.849
progesterone receptor signaling pathway (GO:0050847)	9	1	0.2	+	4.95	0.199	1
positive regulation of mitophagy in response to mitochondrial depolarization (GO:0098779)	9	1	0.2	+	4.95	0.199	1
positive regulation of lipopolysaccharide-mediated signaling pathway (GO:0031666)	9	1	0.2	+	4.95	0.199	1
heat generation (GO:0031649)	9	1	0.2	+	4.95	0.199	1
retinoic acid receptor signaling pathway (GO:0048384)	18	2	0.4	+	4.95	0.0706	0.848
lymph vessel morphogenesis (GO:0036303)	18	2	0.4	+	4.95	0.0706	0.848
nail development (GO:0035878)	9	1	0.2	+	4.95	0.199	1
regulation of skeletal muscle tissue regeneration (GO:0043416)	9	1	0.2	+	4.95	0.199	1
positive regulation of prostaglandin biosynthetic process (GO:0031394)	9	1	0.2	+	4.95	0.199	1
response to hepatocyte growth factor (GO:0035728)	18	2	0.4	+	4.95	0.0706	0.847
common myeloid progenitor cell proliferation (GO:0035726)	9	1	0.2	+	4.95	0.199	1
response to water (GO:0009415)	9	1	0.2	+	4.95	0.199	1
response to platelet-derived growth factor (GO:0036119)	18	2	0.4	+	4.95	0.0706	0.846
positive regulation of cyclase activity (GO:0031281)	18	2	0.4	+	4.95	0.0706	0.846
maintenance of blood-brain barrier (GO:0035633)	18	2	0.4	+	4.95	0.0706	0.845
long-chain fatty acid catabolic process (GO:0042758)	9	1	0.2	+	4.95	0.199	1
ovulation (GO:0030728)	18	2	0.4	+	4.95	0.0706	0.844
non-canonical Wnt signaling pathway (GO:0035567)	36	4	0.81	+	4.95	0.0113	0.334
positive regulation of metallopeptidase activity (GO:1905050)	9	1	0.2	+	4.95	0.199	1
stress fiber assembly (GO:0043149)	18	2	0.4	+	4.95	0.0706	0.844
ribonucleoside diphosphate catabolic process (GO:0009191)	9	1	0.2	+	4.95	0.199	1
nonassociative learning (GO:0046958)	9	1	0.2	+	4.95	0.199	1
regulation of saliva secretion (GO:0046877)	9	1	0.2	+	4.95	0.199	1
positive regulation of cholesterol esterification (GO:0010873)	9	1	0.2	+	4.95	0.199	1
necroptotic signaling pathway (GO:0097527)	9	1	0.2	+	4.95	0.199	1
positive regulation of triglyceride biosynthetic process (GO:0010867)	18	2	0.4	+	4.95	0.0706	0.843
regulation of gastro-intestinal system smooth muscle contraction (GO:1904304)	9	1	0.2	+	4.95	0.199	1
sympathetic ganglion development (GO:0061549)	9	1	0.2	+	4.95	0.199	1
carbon dioxide transport (GO:0015670)	9	1	0.2	+	4.95	0.199	1
ectopic germ cell programmed cell death (GO:0035234)	9	1	0.2	+	4.95	0.199	1
transport of virus (GO:0046794)	9	1	0.2	+	4.95	0.199	1
regulation of hydrogen peroxide biosynthetic process (GO:0010728)	9	1	0.2	+	4.95	0.199	1
kidney vasculature development (GO:0061440)	18	2	0.4	+	4.95	0.0706	0.842
renal system vasculature development (GO:0061437)	18	2	0.4	+	4.95	0.0706	0.842
negative regulation of establishment of protein localization to mitochondrion (GO:1903748)	9	1	0.2	+	4.95	0.199	1
positive regulation of gamma-delta T cell activation (GO:0046645)	9	1	0.2	+	4.95	0.199	1
regulation of complement-dependent cytotoxicity (GO:1903659)	9	1	0.2	+	4.95	0.199	1
positive regulation of blood vessel endothelial cell proliferation involved in sprouting angiogenesis (GO:1903589)	9	1	0.2	+	4.95	0.199	1
contractile actin filament bundle assembly (GO:0030038)	18	2	0.4	+	4.95	0.0706	0.841
mesenchymal-epithelial cell signaling (GO:0060638)	9	1	0.2	+	4.95	0.199	1
very-low-density lipoprotein particle assembly (GO:0034379)	9	1	0.2	+	4.95	0.199	1
negative regulation of glial cell apoptotic process (GO:0034351)	9	1	0.2	+	4.95	0.199	1
adherens junction organization (GO:0034332)	45	5	1.01	+	4.95	0.00471	0.192
olfactory bulb interneuron development (GO:0021891)	9	1	0.2	+	4.95	0.199	1
T-helper 17 cell lineage commitment (GO:0072540)	9	1	0.2	+	4.95	0.199	1
apoptotic process involved in morphogenesis (GO:0060561)	18	2	0.4	+	4.95	0.0706	0.841
diaphragm development (GO:0060539)	9	1	0.2	+	4.95	0.199	1
ovulation cycle (GO:0042698)	55	6	1.24	+	4.86	0.00218	0.127
regulation of lamellipodium organization (GO:1902743)	46	5	1.03	+	4.84	0.00513	0.2
regulation of Rho protein signal transduction (GO:0035023)	138	15	3.1	+	4.84	1.5e-06	0.000641
positive regulation of steroid metabolic process (GO:0045940)	37	4	0.83	+	4.81	0.0123	0.352
negative regulation of reactive oxygen species biosynthetic process (GO:1903427)	37	4	0.83	+	4.81	0.0123	0.351
regulation of muscle hypertrophy (GO:0014743)	74	8	1.66	+	4.81	0.000441	0.0455
apoptotic process involved in development (GO:1902742)	28	3	0.63	+	4.77	0.0301	0.611
positive regulation of p38MAPK cascade (GO:1900745)	28	3	0.63	+	4.77	0.0301	0.61
positive regulation of steroid biosynthetic process (GO:0010893)	28	3	0.63	+	4.77	0.0301	0.609
substrate adhesion-dependent cell spreading (GO:0034446)	56	6	1.26	+	4.77	0.00237	0.133
positive regulation of heart rate (GO:0010460)	28	3	0.63	+	4.77	0.0301	0.608
positive regulation of alcohol biosynthetic process (GO:1902932)	28	3	0.63	+	4.77	0.0301	0.607
dendrite morphogenesis (GO:0048813)	75	8	1.69	+	4.75	0.000479	0.0484
blastoderm segmentation (GO:0007350)	19	2	0.43	+	4.69	0.0769	0.888
manganese ion transport (GO:0006828)	19	2	0.43	+	4.69	0.0769	0.888
corpus callosum development (GO:0022038)	19	2	0.43	+	4.69	0.0769	0.887
secretion by tissue (GO:0032941)	19	2	0.43	+	4.69	0.0769	0.886
vascular endothelial growth factor signaling pathway (GO:0038084)	19	2	0.43	+	4.69	0.0769	0.886
negative regulation of endoplasmic reticulum stress-induced intrinsic apoptotic signaling pathway (GO:1902236)	19	2	0.43	+	4.69	0.0769	0.885
neurotransmitter receptor localization to postsynaptic specialization membrane (GO:0099645)	19	2	0.43	+	4.69	0.0769	0.885
protein localization to postsynaptic specialization membrane (GO:0099633)	19	2	0.43	+	4.69	0.0769	0.884
pigment granule organization (GO:0048753)	19	2	0.43	+	4.69	0.0769	0.883
positive regulation of lyase activity (GO:0051349)	19	2	0.43	+	4.69	0.0769	0.883
positive regulation of blood vessel endothelial cell migration (GO:0043536)	57	6	1.28	+	4.69	0.00257	0.139
positive regulation of vascular associated smooth muscle cell migration (GO:1904754)	19	2	0.43	+	4.69	0.0769	0.882
retinal ganglion cell axon guidance (GO:0031290)	19	2	0.43	+	4.69	0.0769	0.881
negative regulation of vascular permeability (GO:0043116)	19	2	0.43	+	4.69	0.0769	0.881
negative regulation of anion transmembrane transport (GO:1903960)	19	2	0.43	+	4.69	0.0769	0.88
retina vasculature development in camera-type eye (GO:0061298)	19	2	0.43	+	4.69	0.0769	0.879
positive regulation of autophagy of mitochondrion (GO:1903599)	19	2	0.43	+	4.69	0.0769	0.879
striated muscle cell proliferation (GO:0014855)	19	2	0.43	+	4.69	0.0769	0.878
vesicle transport along actin filament (GO:0030050)	19	2	0.43	+	4.69	0.0769	0.878
positive regulation of fatty acid oxidation (GO:0046321)	19	2	0.43	+	4.69	0.0769	0.877
pyrimidine-containing compound catabolic process (GO:0072529)	19	2	0.43	+	4.69	0.0769	0.876
regulation of adenylate cyclase activity (GO:0045761)	29	3	0.65	+	4.6	0.0326	0.638
protein localization to Golgi apparatus (GO:0034067)	29	3	0.65	+	4.6	0.0326	0.637
positive regulation of cyclin-dependent protein kinase activity (GO:1904031)	29	3	0.65	+	4.6	0.0326	0.636
response to activity (GO:0014823)	29	3	0.65	+	4.6	0.0326	0.635
negative regulation of heart contraction (GO:0045822)	29	3	0.65	+	4.6	0.0326	0.635
outflow tract septum morphogenesis (GO:0003148)	29	3	0.65	+	4.6	0.0326	0.634
regulation of epidermal growth factor receptor signaling pathway (GO:0042058)	68	7	1.53	+	4.58	0.0013	0.0894
positive regulation of substrate adhesion-dependent cell spreading (GO:1900026)	39	4	0.88	+	4.57	0.0145	0.391
eye photoreceptor cell development (GO:0042462)	39	4	0.88	+	4.57	0.0145	0.39
positive regulation of protein tyrosine kinase activity (GO:0061098)	49	5	1.1	+	4.54	0.00655	0.234
lung-associated mesenchyme development (GO:0060484)	10	1	0.22	+	4.45	0.217	1
bronchus development (GO:0060433)	10	1	0.22	+	4.45	0.217	1
toll-like receptor 3 signaling pathway (GO:0034138)	10	1	0.22	+	4.45	0.217	1
facial nerve structural organization (GO:0021612)	10	1	0.22	+	4.45	0.217	1
tyrosine phosphorylation of STAT protein (GO:0007260)	10	1	0.22	+	4.45	0.217	1
floor plate development (GO:0033504)	10	1	0.22	+	4.45	0.217	1
negative regulation of cellular senescence (GO:2000773)	20	2	0.45	+	4.45	0.0834	0.924
gamma-aminobutyric acid signaling pathway (GO:0007214)	30	3	0.67	+	4.45	0.0353	0.666
inositol trisphosphate metabolic process (GO:0032957)	10	1	0.22	+	4.45	0.217	1
SREBP signaling pathway (GO:0032933)	10	1	0.22	+	4.45	0.217	1
phosphatidic acid biosynthetic process (GO:0006654)	20	2	0.45	+	4.45	0.0834	0.924
loop of Henle development (GO:0072070)	10	1	0.22	+	4.45	0.217	1
neurofilament cytoskeleton organization (GO:0060052)	10	1	0.22	+	4.45	0.217	1
zinc ion transmembrane transport (GO:0071577)	20	2	0.45	+	4.45	0.0834	0.923
protein deglycosylation (GO:0006517)	10	1	0.22	+	4.45	0.217	1
synaptic transmission, GABAergic (GO:0051932)	20	2	0.45	+	4.45	0.0834	0.922
regulation of focal adhesion assembly (GO:0051893)	60	6	1.35	+	4.45	0.00326	0.159
glycogen catabolic process (GO:0005980)	10	1	0.22	+	4.45	0.217	1
protein prenylation (GO:0018342)	10	1	0.22	+	4.45	0.217	1
response to redox state (GO:0051775)	10	1	0.22	+	4.45	0.217	1
T-helper 1 cell differentiation (GO:0045063)	10	1	0.22	+	4.45	0.217	1
regulation of neutrophil apoptotic process (GO:0033029)	10	1	0.22	+	4.45	0.217	1
divalent metal ion export (GO:0070839)	10	1	0.22	+	4.45	0.217	1
neurotransmitter receptor diffusion trapping (GO:0099628)	10	1	0.22	+	4.45	0.217	1
neuron projection maintenance (GO:1990535)	10	1	0.22	+	4.45	0.217	1
negative regulation of dendrite development (GO:2000171)	10	1	0.22	+	4.45	0.217	1
Rap protein signal transduction (GO:0032486)	10	1	0.22	+	4.45	0.217	1
melanosome localization (GO:0032400)	20	2	0.45	+	4.45	0.0834	0.922
regulation of growth rate (GO:0040009)	10	1	0.22	+	4.45	0.217	1
embryonic viscerocranium morphogenesis (GO:0048703)	10	1	0.22	+	4.45	0.217	1
glycerol-3-phosphate metabolic process (GO:0006072)	10	1	0.22	+	4.45	0.217	1
postsynaptic neurotransmitter receptor diffusion trapping (GO:0098970)	10	1	0.22	+	4.45	0.217	1
receptor diffusion trapping (GO:0098953)	10	1	0.22	+	4.45	0.217	1
fructose metabolic process (GO:0006000)	10	1	0.22	+	4.45	0.217	1
microtubule nucleation by microtubule organizing center (GO:0051418)	10	1	0.22	+	4.45	0.217	1
regulation of cell-substrate junction assembly (GO:0090109)	60	6	1.35	+	4.45	0.00326	0.158
negative regulation of muscle organ development (GO:0048635)	20	2	0.45	+	4.45	0.0834	0.921
regulation of calcium ion import across plasma membrane (GO:1905664)	10	1	0.22	+	4.45	0.217	1
peptidyl-tyrosine dephosphorylation involved in inactivation of protein kinase activity (GO:1990264)	10	1	0.22	+	4.45	0.217	1
positive regulation of fatty acid beta-oxidation (GO:0032000)	10	1	0.22	+	4.45	0.217	1
regulation of synaptic vesicle cycle (GO:0098693)	10	1	0.22	+	4.45	0.217	1
protein K11-linked deubiquitination (GO:0035871)	10	1	0.22	+	4.45	0.217	1
negative regulation of urine volume (GO:0035811)	10	1	0.22	+	4.45	0.217	1
negative regulation of nitric-oxide synthase activity (GO:0051001)	10	1	0.22	+	4.45	0.217	1
positive regulation of long-term synaptic depression (GO:1900454)	10	1	0.22	+	4.45	0.217	1
deadenylation-dependent decapping of nuclear-transcribed mRNA (GO:0000290)	10	1	0.22	+	4.45	0.217	1
anoikis (GO:0043276)	10	1	0.22	+	4.45	0.217	1
protein localization to endosome (GO:0036010)	10	1	0.22	+	4.45	0.217	1
calcium-mediated signaling using intracellular calcium source (GO:0035584)	20	2	0.45	+	4.45	0.0834	0.92
sequestering of extracellular ligand from receptor (GO:0035581)	10	1	0.22	+	4.45	0.217	1
glucan catabolic process (GO:0009251)	10	1	0.22	+	4.45	0.217	1
potassium ion homeostasis (GO:0055075)	30	3	0.67	+	4.45	0.0353	0.666
post-embryonic camera-type eye development (GO:0031077)	10	1	0.22	+	4.45	0.217	1
regulation of anion transmembrane transport (GO:1903959)	40	4	0.9	+	4.45	0.0156	0.408
glycolytic process through glucose-6-phosphate (GO:0061620)	10	1	0.22	+	4.45	0.217	1
nucleotide-sugar transmembrane transport (GO:0015780)	10	1	0.22	+	4.45	0.217	1
negative regulation of bone remodeling (GO:0046851)	20	2	0.45	+	4.45	0.0834	0.92
regulation of iron ion transport (GO:0034756)	10	1	0.22	+	4.45	0.217	1
synaptic vesicle priming (GO:0016082)	20	2	0.45	+	4.45	0.0834	0.919
negative regulation of macrophage derived foam cell differentiation (GO:0010745)	10	1	0.22	+	4.45	0.217	1
regulation of cardiac conduction (GO:1903779)	10	1	0.22	+	4.45	0.217	1
regulation of plasma membrane organization (GO:1903729)	10	1	0.22	+	4.45	0.217	1
prenylation (GO:0097354)	10	1	0.22	+	4.45	0.217	1
regulation of alkaline phosphatase activity (GO:0010692)	10	1	0.22	+	4.45	0.217	1
regulation of cardiac muscle adaptation (GO:0010612)	10	1	0.22	+	4.45	0.217	1
behavioral response to nicotine (GO:0035095)	10	1	0.22	+	4.45	0.217	1
semicircular canal development (GO:0060872)	10	1	0.22	+	4.45	0.217	1
development of secondary female sexual characteristics (GO:0046543)	10	1	0.22	+	4.45	0.217	1
chorio-allantoic fusion (GO:0060710)	10	1	0.22	+	4.45	0.217	1
negative regulation of muscle contraction (GO:0045932)	30	3	0.67	+	4.45	0.0353	0.665
negative regulation of blood vessel diameter (GO:0097756)	50	5	1.12	+	4.45	0.00708	0.242
regulation of macroautophagy (GO:0016241)	102	10	2.29	+	4.36	0.000183	0.0235
regulation of p38MAPK cascade (GO:1900744)	41	4	0.92	+	4.34	0.0169	0.421
negative regulation of cell junction assembly (GO:1901889)	31	3	0.7	+	4.31	0.0381	0.702
viral entry into host cell (GO:0046718)	31	3	0.7	+	4.31	0.0381	0.701
negative regulation of blood circulation (GO:1903523)	31	3	0.7	+	4.31	0.0381	0.7
negative regulation of response to oxidative stress (GO:1902883)	31	3	0.7	+	4.31	0.0381	0.699
regulation of systemic arterial blood pressure mediated by a chemical signal (GO:0003044)	52	5	1.17	+	4.28	0.00823	0.272
chloride transmembrane transport (GO:1902476)	52	5	1.17	+	4.28	0.00823	0.272
regulation of ERBB signaling pathway (GO:1901184)	73	7	1.64	+	4.27	0.00189	0.112
activation of phospholipase C activity (GO:0007202)	21	2	0.47	+	4.24	0.0901	0.919
response to ethanol (GO:0045471)	63	6	1.42	+	4.24	0.00407	0.177
regulation of ATP biosynthetic process (GO:2001169)	21	2	0.47	+	4.24	0.0901	0.919
regulation of mitochondrial depolarization (GO:0051900)	21	2	0.47	+	4.24	0.0901	0.918
pigment granule localization (GO:0051875)	21	2	0.47	+	4.24	0.0901	0.918
cartilage condensation (GO:0001502)	21	2	0.47	+	4.24	0.0901	0.917
regulation of lymphocyte chemotaxis (GO:1901623)	21	2	0.47	+	4.24	0.0901	0.916
positive regulation of amyloid-beta formation (GO:1902004)	21	2	0.47	+	4.24	0.0901	0.916
actin filament-based transport (GO:0099515)	21	2	0.47	+	4.24	0.0901	0.915
regulation of fatty acid beta-oxidation (GO:0031998)	21	2	0.47	+	4.24	0.0901	0.915
regulation of protein kinase C signaling (GO:0090036)	21	2	0.47	+	4.24	0.0901	0.914
anatomical structure arrangement (GO:0048532)	21	2	0.47	+	4.24	0.0901	0.913
inositol phosphate-mediated signaling (GO:0048016)	21	2	0.47	+	4.24	0.0901	0.913
chloride ion homeostasis (GO:0055064)	21	2	0.47	+	4.24	0.0901	0.912
positive regulation of histone deacetylation (GO:0031065)	21	2	0.47	+	4.24	0.0901	0.912
dendritic spine morphogenesis (GO:0060997)	21	2	0.47	+	4.24	0.0901	0.911
protein localization to postsynaptic membrane (GO:1903539)	42	4	0.94	+	4.24	0.0182	0.444
T-helper 1 type immune response (GO:0042088)	21	2	0.47	+	4.24	0.0901	0.911
entry into host (GO:0044409)	32	3	0.72	+	4.17	0.0411	0.741
blood vessel endothelial cell migration (GO:0043534)	32	3	0.72	+	4.17	0.0411	0.74
negative regulation of macroautophagy (GO:0016242)	32	3	0.72	+	4.17	0.0411	0.739
coronary vasculature morphogenesis (GO:0060977)	32	3	0.72	+	4.17	0.0411	0.738
regulation of cellular response to insulin stimulus (GO:1900076)	75	7	1.69	+	4.15	0.00218	0.127
negative chemotaxis (GO:0050919)	43	4	0.97	+	4.14	0.0195	0.471
regulation of fatty acid biosynthetic process (GO:0042304)	43	4	0.97	+	4.14	0.0195	0.47
regulation of substrate adhesion-dependent cell spreading (GO:1900024)	54	5	1.21	+	4.12	0.00949	0.3
regulation of cell-substrate junction organization (GO:0150116)	65	6	1.46	+	4.11	0.00469	0.192
regulation of small GTPase mediated signal transduction (GO:0051056)	271	25	6.09	+	4.11	1.08e-08	2.84e-05
regulation of muscle adaptation (GO:0043502)	98	9	2.2	+	4.09	0.000593	0.0557
negative regulation of G protein-coupled receptor signaling pathway (GO:0045744)	55	5	1.24	+	4.05	0.0102	0.315
regulation of hydrogen peroxide-induced cell death (GO:1903205)	33	3	0.74	+	4.05	0.0441	0.688
smooth muscle contraction (GO:0006939)	55	5	1.24	+	4.05	0.0102	0.315
cell volume homeostasis (GO:0006884)	33	3	0.74	+	4.05	0.0441	0.688
negative regulation of extrinsic apoptotic signaling pathway in absence of ligand (GO:2001240)	33	3	0.74	+	4.05	0.0441	0.687
camera-type eye photoreceptor cell differentiation (GO:0060219)	33	3	0.74	+	4.05	0.0441	0.686
centrosome localization (GO:0051642)	33	3	0.74	+	4.05	0.0441	0.686
negative regulation of chemotaxis (GO:0050922)	55	5	1.24	+	4.05	0.0102	0.314
negative regulation of signal transduction in absence of ligand (GO:1901099)	33	3	0.74	+	4.05	0.0441	0.685
lactation (GO:0007595)	33	3	0.74	+	4.05	0.0441	0.684
body fluid secretion (GO:0007589)	55	5	1.24	+	4.05	0.0102	0.314
regulation of vascular associated smooth muscle contraction (GO:0003056)	11	1	0.25	+	4.05	0.234	1
signal transduction involved in mitotic G1 DNA damage checkpoint (GO:0072431)	11	1	0.25	+	4.05	0.234	1
regulation of toll-like receptor 2 signaling pathway (GO:0034135)	11	1	0.25	+	4.05	0.234	1
pinocytosis (GO:0006907)	11	1	0.25	+	4.05	0.234	1
negative regulation of endothelial cell differentiation (GO:0045602)	11	1	0.25	+	4.05	0.234	1
growth hormone receptor signaling pathway (GO:0060396)	11	1	0.25	+	4.05	0.234	1
regulation of behavioral fear response (GO:2000822)	11	1	0.25	+	4.05	0.234	1
trigeminal nerve development (GO:0021559)	11	1	0.25	+	4.05	0.234	1
neuronal action potential propagation (GO:0019227)	11	1	0.25	+	4.05	0.234	1
positive regulation of autophagosome assembly (GO:2000786)	11	1	0.25	+	4.05	0.234	1
negative regulation of cellular response to vascular endothelial growth factor stimulus (GO:1902548)	11	1	0.25	+	4.05	0.234	1
regulation of cellular response to vascular endothelial growth factor stimulus (GO:1902547)	22	2	0.49	+	4.05	0.0969	0.966
histamine secretion (GO:0001821)	11	1	0.25	+	4.05	0.234	1
regulation of receptor catabolic process (GO:2000644)	11	1	0.25	+	4.05	0.234	1
regulation of dopamine receptor signaling pathway (GO:0060159)	11	1	0.25	+	4.05	0.234	1
glycosphingolipid biosynthetic process (GO:0006688)	22	2	0.49	+	4.05	0.0969	0.966
intracellular signal transduction involved in G1 DNA damage checkpoint (GO:1902400)	11	1	0.25	+	4.05	0.234	1
regulation of endothelial cell chemotaxis (GO:2001026)	22	2	0.49	+	4.05	0.0969	0.965
Leydig cell differentiation (GO:0033327)	11	1	0.25	+	4.05	0.234	1
righting reflex (GO:0060013)	11	1	0.25	+	4.05	0.234	1
cysteine metabolic process (GO:0006534)	11	1	0.25	+	4.05	0.234	1
cellular response to sterol depletion (GO:0071501)	11	1	0.25	+	4.05	0.234	1
Fc receptor signaling pathway (GO:0038093)	11	1	0.25	+	4.05	0.234	1
histone H4 deacetylation (GO:0070933)	11	1	0.25	+	4.05	0.234	1
regulation of glucocorticoid receptor signaling pathway (GO:2000322)	11	1	0.25	+	4.05	0.234	1
cellular response to growth hormone stimulus (GO:0071378)	11	1	0.25	+	4.05	0.234	1
cellular response to ethanol (GO:0071361)	11	1	0.25	+	4.05	0.234	1
protein mono-ADP-ribosylation (GO:0140289)	11	1	0.25	+	4.05	0.234	1
protein localization to axon (GO:0099612)	11	1	0.25	+	4.05	0.234	1
regulation of hematopoietic stem cell differentiation (GO:1902036)	11	1	0.25	+	4.05	0.234	1
maintenance of organelle location (GO:0051657)	11	1	0.25	+	4.05	0.234	1
phagosome-lysosome fusion (GO:0090385)	11	1	0.25	+	4.05	0.234	1
venous blood vessel morphogenesis (GO:0048845)	11	1	0.25	+	4.05	0.234	1
negative regulation of translation, ncRNA-mediated (GO:0040033)	11	1	0.25	+	4.05	0.234	1
purine nucleobase metabolic process (GO:0006144)	22	2	0.49	+	4.05	0.0969	0.965
glucose catabolic process (GO:0006007)	11	1	0.25	+	4.05	0.234	1
positive regulation of kidney development (GO:0090184)	11	1	0.25	+	4.05	0.234	1
regulation of store-operated calcium channel activity (GO:1901339)	11	1	0.25	+	4.05	0.234	1
cellular polysaccharide catabolic process (GO:0044247)	11	1	0.25	+	4.05	0.234	1
action potential propagation (GO:0098870)	11	1	0.25	+	4.05	0.234	1
negative regulation of T cell receptor signaling pathway (GO:0050860)	22	2	0.49	+	4.05	0.0969	0.964
cell aggregation (GO:0098743)	22	2	0.49	+	4.05	0.0969	0.963
regulation of vascular associated smooth muscle cell apoptotic process (GO:1905459)	11	1	0.25	+	4.05	0.234	1
protein auto-ADP-ribosylation (GO:0070213)	11	1	0.25	+	4.05	0.234	1
negative regulation of purine nucleotide metabolic process (GO:1900543)	22	2	0.49	+	4.05	0.0969	0.963
cellular pigment accumulation (GO:0043482)	11	1	0.25	+	4.05	0.234	1
positive regulation of mRNA 3'-end processing (GO:0031442)	11	1	0.25	+	4.05	0.234	1
inhibitory synapse assembly (GO:1904862)	11	1	0.25	+	4.05	0.234	1
CD8-positive, alpha-beta T cell differentiation (GO:0043374)	11	1	0.25	+	4.05	0.234	1
regulation of synaptic vesicle endocytosis (GO:1900242)	22	2	0.49	+	4.05	0.0969	0.962
extracellular negative regulation of signal transduction (GO:1900116)	11	1	0.25	+	4.05	0.234	1
extracellular regulation of signal transduction (GO:1900115)	11	1	0.25	+	4.05	0.234	1
negative regulation of endoplasmic reticulum unfolded protein response (GO:1900102)	11	1	0.25	+	4.05	0.234	1
glycine transport (GO:0015816)	11	1	0.25	+	4.05	0.234	1
negative regulation of hippo signaling (GO:0035331)	11	1	0.25	+	4.05	0.234	1
regulation of synaptic vesicle priming (GO:0010807)	11	1	0.25	+	4.05	0.234	1
miRNA mediated inhibition of translation (GO:0035278)	11	1	0.25	+	4.05	0.234	1
response to histamine (GO:0034776)	11	1	0.25	+	4.05	0.234	1
fructose 1,6-bisphosphate metabolic process (GO:0030388)	11	1	0.25	+	4.05	0.234	1
response to mercury ion (GO:0046689)	11	1	0.25	+	4.05	0.234	1
cardiac cell fate commitment (GO:0060911)	11	1	0.25	+	4.05	0.234	1
autophagosome maturation (GO:0097352)	22	2	0.49	+	4.05	0.0969	0.961
positive regulation of sprouting angiogenesis (GO:1903672)	22	2	0.49	+	4.05	0.0969	0.961
negative regulation of sprouting angiogenesis (GO:1903671)	11	1	0.25	+	4.05	0.234	1
negative regulation of humoral immune response (GO:0002921)	11	1	0.25	+	4.05	0.234	1
nuclear-transcribed mRNA catabolic process, exonucleolytic, 3'-5' (GO:0034427)	11	1	0.25	+	4.05	0.234	1
regulation of translation, ncRNA-mediated (GO:0045974)	11	1	0.25	+	4.05	0.234	1
regulation of female receptivity (GO:0045924)	11	1	0.25	+	4.05	0.234	1
regulation of branching involved in salivary gland morphogenesis (GO:0060693)	11	1	0.25	+	4.05	0.234	1
regulation of secondary heart field cardioblast proliferation (GO:0003266)	11	1	0.25	+	4.05	0.234	1
vascular associated smooth muscle cell development (GO:0097084)	11	1	0.25	+	4.05	0.234	1
dichotomous subdivision of an epithelial terminal unit (GO:0060600)	11	1	0.25	+	4.05	0.234	1
retrograde axonal transport (GO:0008090)	22	2	0.49	+	4.05	0.0969	0.96
regulation of fear response (GO:1903365)	11	1	0.25	+	4.05	0.234	1
T-helper 17 cell differentiation (GO:0072539)	11	1	0.25	+	4.05	0.234	1
negative regulation of extrinsic apoptotic signaling pathway (GO:2001237)	101	9	2.27	+	3.97	0.000725	0.0609
regulation of vacuole organization (GO:0044088)	45	4	1.01	+	3.96	0.0224	0.523
hindlimb morphogenesis (GO:0035137)	45	4	1.01	+	3.96	0.0224	0.522
forelimb morphogenesis (GO:0035136)	45	4	1.01	+	3.96	0.0224	0.522
positive regulation of fatty acid metabolic process (GO:0045923)	45	4	1.01	+	3.96	0.0224	0.521
positive regulation of lamellipodium organization (GO:1902745)	34	3	0.76	+	3.93	0.0472	0.717
regulation of autophagy of mitochondrion (GO:1903146)	34	3	0.76	+	3.93	0.0472	0.717
startle response (GO:0001964)	34	3	0.76	+	3.93	0.0472	0.716
protein targeting to vacuole (GO:0006623)	34	3	0.76	+	3.93	0.0472	0.715
negative regulation of reactive oxygen species metabolic process (GO:2000378)	68	6	1.53	+	3.93	0.00574	0.214
regulation of neuronal synaptic plasticity (GO:0048168)	68	6	1.53	+	3.93	0.00574	0.214
microtubule organizing center localization (GO:0061842)	34	3	0.76	+	3.93	0.0472	0.715
calcium-dependent cell-cell adhesion via plasma membrane cell adhesion molecules (GO:0016339)	34	3	0.76	+	3.93	0.0472	0.714
response to cadmium ion (GO:0046686)	34	3	0.76	+	3.93	0.0472	0.713
cell junction maintenance (GO:0034331)	34	3	0.76	+	3.93	0.0472	0.713
establishment of endothelial barrier (GO:0061028)	34	3	0.76	+	3.93	0.0472	0.712
protein O-linked glycosylation (GO:0006493)	57	5	1.28	+	3.9	0.0116	0.341
receptor clustering (GO:0043113)	57	5	1.28	+	3.9	0.0116	0.341
regulation of cell junction assembly (GO:1901888)	206	18	4.63	+	3.89	2.54e-06	0.000932
positive regulation of endothelial cell migration (GO:0010595)	103	9	2.31	+	3.89	0.000825	0.0661
leukotriene metabolic process (GO:0006691)	23	2	0.52	+	3.87	0.104	1
action potential (GO:0001508)	92	8	2.07	+	3.87	0.00163	0.102
transcytosis (GO:0045056)	23	2	0.52	+	3.87	0.104	1
cellular response to misfolded protein (GO:0071218)	23	2	0.52	+	3.87	0.104	1
chemical synaptic transmission, postsynaptic (GO:0099565)	46	4	1.03	+	3.87	0.0239	0.538
positive regulation of branching involved in ureteric bud morphogenesis (GO:0090190)	23	2	0.52	+	3.87	0.104	1
protein heterooligomerization (GO:0051291)	23	2	0.52	+	3.87	0.104	1
regulation of membrane protein ectodomain proteolysis (GO:0051043)	23	2	0.52	+	3.87	0.104	1
Rac protein signal transduction (GO:0016601)	23	2	0.52	+	3.87	0.104	1
regulation of triglyceride biosynthetic process (GO:0010866)	23	2	0.52	+	3.87	0.104	1
regulation of macrophage derived foam cell differentiation (GO:0010743)	23	2	0.52	+	3.87	0.104	1
melanocyte differentiation (GO:0030318)	23	2	0.52	+	3.87	0.104	1
response to fluid shear stress (GO:0034405)	23	2	0.52	+	3.87	0.104	1
negative regulation of nucleotide metabolic process (GO:0045980)	23	2	0.52	+	3.87	0.104	1
establishment of protein localization to vacuole (GO:0072666)	46	4	1.03	+	3.87	0.0239	0.538
adult walking behavior (GO:0007628)	46	4	1.03	+	3.87	0.0239	0.537
regulation of synapse assembly (GO:0051963)	115	10	2.58	+	3.87	0.000446	0.0454
regulation of synaptic vesicle exocytosis (GO:2000300)	69	6	1.55	+	3.87	0.00612	0.225
positive regulation of epithelial cell migration (GO:0010634)	150	13	3.37	+	3.86	6.72e-05	0.0113
regulation of kidney development (GO:0090183)	35	3	0.79	+	3.82	0.0505	0.752
actin cytoskeleton reorganization (GO:0031532)	70	6	1.57	+	3.82	0.00653	0.234
negative regulation of epithelial to mesenchymal transition (GO:0010719)	35	3	0.79	+	3.82	0.0505	0.751
negative regulation of axon extension (GO:0030517)	47	4	1.06	+	3.79	0.0255	0.556
embryonic digit morphogenesis (GO:0042733)	71	6	1.6	+	3.76	0.00695	0.24
photoreceptor cell development (GO:0042461)	60	5	1.35	+	3.71	0.0141	0.384
regulation of Ras protein signal transduction (GO:0046578)	240	20	5.39	+	3.71	1.4e-06	0.000633
glomerular filtration (GO:0003094)	12	1	0.27	+	3.71	0.251	1
trachea morphogenesis (GO:0060439)	12	1	0.27	+	3.71	0.251	1
response to sterol depletion (GO:0006991)	12	1	0.27	+	3.71	0.251	1
microtubule anchoring at microtubule organizing center (GO:0072393)	12	1	0.27	+	3.71	0.251	1
facial nerve morphogenesis (GO:0021610)	12	1	0.27	+	3.71	0.251	1
regulation of Fc receptor mediated stimulatory signaling pathway (GO:0060368)	12	1	0.27	+	3.71	0.251	1
cellular zinc ion homeostasis (GO:0006882)	24	2	0.54	+	3.71	0.111	0.991
methylguanosine-cap decapping (GO:0110156)	12	1	0.27	+	3.71	0.251	1
regulation of gamma-delta T cell differentiation (GO:0045586)	12	1	0.27	+	3.71	0.251	1
facial nerve development (GO:0021561)	12	1	0.27	+	3.71	0.251	1
receptor signaling pathway via JAK-STAT (GO:0007259)	36	3	0.81	+	3.71	0.0538	0.781
alditol phosphate metabolic process (GO:0052646)	12	1	0.27	+	3.71	0.251	1
regulation of calcium ion transmembrane transport via high voltage-gated calcium channel (GO:1902514)	12	1	0.27	+	3.71	0.251	1
receptor recycling (GO:0001881)	12	1	0.27	+	3.71	0.251	1
positive regulation of MHC class II biosynthetic process (GO:0045348)	12	1	0.27	+	3.71	0.251	1
mesodermal cell fate commitment (GO:0001710)	12	1	0.27	+	3.71	0.251	1
angiogenesis involved in wound healing (GO:0060055)	12	1	0.27	+	3.71	0.251	1
positive regulation of natural killer cell differentiation (GO:0032825)	12	1	0.27	+	3.71	0.251	1
positive regulation of cellular amine metabolic process (GO:0033240)	12	1	0.27	+	3.71	0.251	1
walking behavior (GO:0090659)	48	4	1.08	+	3.71	0.0272	0.583
semaphorin-plexin signaling pathway involved in axon guidance (GO:1902287)	12	1	0.27	+	3.71	0.251	1
positive regulation of interleukin-5 production (GO:0032754)	12	1	0.27	+	3.71	0.251	1
negative regulation of lymphocyte migration (GO:2000402)	12	1	0.27	+	3.71	0.251	1
cellular response to acidic pH (GO:0071468)	12	1	0.27	+	3.71	0.251	1
regulation of blood volume by renin-angiotensin (GO:0002016)	12	1	0.27	+	3.71	0.251	1
ovulation from ovarian follicle (GO:0001542)	12	1	0.27	+	3.71	0.251	1
negative regulation of mast cell activation (GO:0033004)	12	1	0.27	+	3.71	0.251	1
endosome to plasma membrane protein transport (GO:0099638)	12	1	0.27	+	3.71	0.251	1
movement in host environment (GO:0052126)	36	3	0.81	+	3.71	0.0538	0.781
pyrimidine nucleoside metabolic process (GO:0006213)	12	1	0.27	+	3.71	0.251	1
positive regulation of protein autophosphorylation (GO:0031954)	24	2	0.54	+	3.71	0.111	0.991
negative regulation of calcium ion import (GO:0090281)	12	1	0.27	+	3.71	0.251	1
inositol metabolic process (GO:0006020)	12	1	0.27	+	3.71	0.251	1
dendritic transport (GO:0098935)	12	1	0.27	+	3.71	0.251	1
regulation of collateral sprouting (GO:0048670)	24	2	0.54	+	3.71	0.111	0.99
positive regulation of protein localization to endosome (GO:1905668)	12	1	0.27	+	3.71	0.251	1
regulation of hydrogen peroxide-mediated programmed cell death (GO:1901298)	12	1	0.27	+	3.71	0.251	1
protein desumoylation (GO:0016926)	12	1	0.27	+	3.71	0.251	1
regulation of fat cell proliferation (GO:0070344)	12	1	0.27	+	3.71	0.251	1
regulation of postsynaptic density assembly (GO:0099151)	12	1	0.27	+	3.71	0.251	1
regulation of neurotransmitter receptor localization to postsynaptic specialization membrane (GO:0098696)	12	1	0.27	+	3.71	0.251	1
intracellular distribution of mitochondria (GO:0048312)	12	1	0.27	+	3.71	0.251	1
pigment accumulation (GO:0043476)	12	1	0.27	+	3.71	0.251	1
positive regulation of immunoglobulin secretion (GO:0051024)	12	1	0.27	+	3.71	0.251	1
regulation of prostaglandin biosynthetic process (GO:0031392)	12	1	0.27	+	3.71	0.251	1
negative regulation of cardiocyte differentiation (GO:1905208)	12	1	0.27	+	3.71	0.251	1
neuron cellular homeostasis (GO:0070050)	24	2	0.54	+	3.71	0.111	0.989
histone deacetylation (GO:0016575)	48	4	1.08	+	3.71	0.0272	0.582
mRNA transcription by RNA polymerase II (GO:0042789)	12	1	0.27	+	3.71	0.251	1
insulin-like growth factor receptor signaling pathway (GO:0048009)	12	1	0.27	+	3.71	0.251	1
protein localization to postsynapse (GO:0062237)	48	4	1.08	+	3.71	0.0272	0.581
anagen (GO:0042640)	12	1	0.27	+	3.71	0.251	1
SNARE complex assembly (GO:0035493)	12	1	0.27	+	3.71	0.251	1
negative regulation of neurotransmitter secretion (GO:0046929)	12	1	0.27	+	3.71	0.251	1
serine family amino acid catabolic process (GO:0009071)	12	1	0.27	+	3.71	0.251	1
aspartate family amino acid catabolic process (GO:0009068)	12	1	0.27	+	3.71	0.251	1
hormone catabolic process (GO:0042447)	12	1	0.27	+	3.71	0.251	1
synaptic vesicle maturation (GO:0016188)	12	1	0.27	+	3.71	0.251	1
dopamine biosynthetic process (GO:0042416)	12	1	0.27	+	3.71	0.251	1
fat-soluble vitamin catabolic process (GO:0042363)	12	1	0.27	+	3.71	0.251	1
synaptic vesicle docking (GO:0016081)	12	1	0.27	+	3.71	0.251	1
poly-N-acetyllactosamine biosynthetic process (GO:0030311)	12	1	0.27	+	3.71	0.251	1
poly-N-acetyllactosamine metabolic process (GO:0030309)	12	1	0.27	+	3.71	0.251	1
embryonic forelimb morphogenesis (GO:0035115)	36	3	0.81	+	3.71	0.0538	0.78
regulation of gamma-delta T cell activation (GO:0046643)	12	1	0.27	+	3.71	0.251	1
positive regulation of insulin receptor signaling pathway (GO:0046628)	24	2	0.54	+	3.71	0.111	0.989
phosphatidylcholine catabolic process (GO:0034638)	12	1	0.27	+	3.71	0.251	1
ketone catabolic process (GO:0042182)	12	1	0.27	+	3.71	0.251	1
positive regulation of glycoprotein biosynthetic process (GO:0010560)	24	2	0.54	+	3.71	0.111	0.988
phosphatidic acid metabolic process (GO:0046473)	24	2	0.54	+	3.71	0.111	0.988
response to stimulus involved in regulation of muscle adaptation (GO:0014874)	12	1	0.27	+	3.71	0.251	1
actin filament depolymerization (GO:0030042)	12	1	0.27	+	3.71	0.251	1
exit from mitosis (GO:0010458)	12	1	0.27	+	3.71	0.251	1
positive regulation of vasoconstriction (GO:0045907)	48	4	1.08	+	3.71	0.0272	0.58
regulation of cardioblast proliferation (GO:0003264)	12	1	0.27	+	3.71	0.251	1
high-density lipoprotein particle remodeling (GO:0034375)	12	1	0.27	+	3.71	0.251	1
regulation of tau-protein kinase activity (GO:1902947)	12	1	0.27	+	3.71	0.251	1
adherens junction assembly (GO:0034333)	12	1	0.27	+	3.71	0.251	1
negative regulation of muscle adaptation (GO:0014745)	12	1	0.27	+	3.71	0.251	1
MyD88-independent toll-like receptor signaling pathway (GO:0002756)	12	1	0.27	+	3.71	0.251	1
motor neuron axon guidance (GO:0008045)	36	3	0.81	+	3.71	0.0538	0.779
T-helper 17 type immune response (GO:0072538)	12	1	0.27	+	3.71	0.251	1
cartilage morphogenesis (GO:0060536)	12	1	0.27	+	3.71	0.251	1
regulation of steroid metabolic process (GO:0019218)	109	9	2.45	+	3.68	0.0012	0.0843
positive regulation of JNK cascade (GO:0046330)	85	7	1.91	+	3.67	0.00417	0.181
negative regulation of blood pressure (GO:0045776)	61	5	1.37	+	3.65	0.015	0.4
negative regulation of cell-substrate adhesion (GO:0010812)	61	5	1.37	+	3.65	0.015	0.399
activation of GTPase activity (GO:0090630)	98	8	2.2	+	3.63	0.00236	0.133
stress-activated protein kinase signaling cascade (GO:0031098)	98	8	2.2	+	3.63	0.00236	0.133
neutral amino acid transport (GO:0015804)	37	3	0.83	+	3.61	0.0573	0.815
receptor signaling pathway via STAT (GO:0097696)	37	3	0.83	+	3.61	0.0573	0.814
regulation of sprouting angiogenesis (GO:1903670)	37	3	0.83	+	3.61	0.0573	0.813
cardiac muscle hypertrophy (GO:0003300)	37	3	0.83	+	3.61	0.0573	0.813
regulation of fatty acid oxidation (GO:0046320)	37	3	0.83	+	3.61	0.0573	0.812
positive regulation of lipid biosynthetic process (GO:0046889)	99	8	2.22	+	3.6	0.00251	0.137
regulation of multicellular organism growth (GO:0040014)	87	7	1.95	+	3.58	0.00469	0.192
dendrite development (GO:0016358)	137	11	3.08	+	3.57	0.000442	0.0453
axonal fasciculation (GO:0007413)	25	2	0.56	+	3.56	0.118	1
GTP metabolic process (GO:0046039)	25	2	0.56	+	3.56	0.118	1
protein kinase C-activating G protein-coupled receptor signaling pathway (GO:0007205)	25	2	0.56	+	3.56	0.118	1
Wnt signaling pathway, planar cell polarity pathway (GO:0060071)	25	2	0.56	+	3.56	0.118	1
epiboly involved in wound healing (GO:0090505)	25	2	0.56	+	3.56	0.118	1
response to misfolded protein (GO:0051788)	25	2	0.56	+	3.56	0.118	1
thymic T cell selection (GO:0045061)	25	2	0.56	+	3.56	0.118	1
wound healing, spreading of cells (GO:0044319)	25	2	0.56	+	3.56	0.118	1
regulation of branching involved in ureteric bud morphogenesis (GO:0090189)	25	2	0.56	+	3.56	0.118	1
neuron projection fasciculation (GO:0106030)	25	2	0.56	+	3.56	0.118	1
behavioral response to pain (GO:0048266)	25	2	0.56	+	3.56	0.118	1
regulation of vascular associated smooth muscle cell migration (GO:1904752)	25	2	0.56	+	3.56	0.118	1
positive regulation of protein processing (GO:0010954)	25	2	0.56	+	3.56	0.118	1
lipid droplet organization (GO:0034389)	25	2	0.56	+	3.56	0.118	1
regulation of alcohol biosynthetic process (GO:1902930)	50	4	1.12	+	3.56	0.0307	0.619
multicellular organismal signaling (GO:0035637)	113	9	2.54	+	3.55	0.00151	0.0982
vasculogenesis (GO:0001570)	88	7	1.98	+	3.54	0.00497	0.199
stem cell development (GO:0048864)	88	7	1.98	+	3.54	0.00497	0.198
regulation of Notch signaling pathway (GO:0008593)	88	7	1.98	+	3.54	0.00497	0.198
olfactory bulb development (GO:0021772)	38	3	0.85	+	3.51	0.0608	0.843
negative regulation of cell-matrix adhesion (GO:0001953)	38	3	0.85	+	3.51	0.0608	0.843
cell-substrate junction assembly (GO:0007044)	38	3	0.85	+	3.51	0.0608	0.842
excitatory postsynaptic potential (GO:0060079)	38	3	0.85	+	3.51	0.0608	0.841
regulation of actin cytoskeleton reorganization (GO:2000249)	38	3	0.85	+	3.51	0.0608	0.84
cellular response to vascular endothelial growth factor stimulus (GO:0035924)	38	3	0.85	+	3.51	0.0608	0.84
peptidyl-tyrosine dephosphorylation (GO:0035335)	38	3	0.85	+	3.51	0.0608	0.839
negative regulation of insulin receptor signaling pathway (GO:0046627)	38	3	0.85	+	3.51	0.0608	0.838
kidney morphogenesis (GO:0060993)	89	7	2	+	3.5	0.00526	0.203
regulation of protein deacetylation (GO:0090311)	51	4	1.15	+	3.49	0.0326	0.639
neuron recognition (GO:0008038)	51	4	1.15	+	3.49	0.0326	0.638
regulation of neurotransmitter receptor activity (GO:0099601)	64	5	1.44	+	3.48	0.0178	0.439
regulation of cell morphogenesis (GO:0022604)	324	25	7.28	+	3.43	2.66e-07	0.000183
renal water homeostasis (GO:0003091)	13	1	0.29	+	3.42	0.267	1
signal transduction involved in mitotic cell cycle checkpoint (GO:0072413)	13	1	0.29	+	3.42	0.267	1
substrate-dependent cell migration (GO:0006929)	26	2	0.58	+	3.42	0.125	1
vesicle fusion (GO:0006906)	78	6	1.75	+	3.42	0.0105	0.315
lateral ventricle development (GO:0021670)	13	1	0.29	+	3.42	0.267	1
pentose metabolic process (GO:0019321)	13	1	0.29	+	3.42	0.267	1
Golgi to endosome transport (GO:0006895)	13	1	0.29	+	3.42	0.267	1
regulation of systemic arterial blood pressure by circulatory renin-angiotensin (GO:0001991)	13	1	0.29	+	3.42	0.267	1
optic nerve development (GO:0021554)	13	1	0.29	+	3.42	0.267	1
regulation of RNA polymerase II regulatory region sequence-specific DNA binding (GO:1903025)	13	1	0.29	+	3.42	0.267	1
positive regulation of glycoprotein metabolic process (GO:1903020)	26	2	0.58	+	3.42	0.125	1
lymph vessel development (GO:0001945)	26	2	0.58	+	3.42	0.125	1
glutamate receptor signaling pathway (GO:0007215)	39	3	0.88	+	3.42	0.0645	0.873
metanephric nephron tubule development (GO:0072234)	13	1	0.29	+	3.42	0.267	1
positive regulation of nuclear-transcribed mRNA poly(A) tail shortening (GO:0060213)	13	1	0.29	+	3.42	0.267	1
fat-soluble vitamin metabolic process (GO:0006775)	26	2	0.58	+	3.42	0.125	1
lymphoid progenitor cell differentiation (GO:0002320)	13	1	0.29	+	3.42	0.267	1
regulation of type B pancreatic cell apoptotic process (GO:2000674)	13	1	0.29	+	3.42	0.267	1
T-helper cell lineage commitment (GO:0002295)	13	1	0.29	+	3.42	0.267	1
signal transduction involved in mitotic DNA integrity checkpoint (GO:1902403)	13	1	0.29	+	3.42	0.267	1
signal transduction involved in mitotic DNA damage checkpoint (GO:1902402)	13	1	0.29	+	3.42	0.267	1
negative regulation of mesenchymal cell apoptotic process (GO:2001054)	13	1	0.29	+	3.42	0.267	1
membrane hyperpolarization (GO:0060081)	13	1	0.29	+	3.42	0.267	1
uterus development (GO:0060065)	26	2	0.58	+	3.42	0.125	1
glycine metabolic process (GO:0006544)	13	1	0.29	+	3.42	0.267	1
negative regulation of telomerase activity (GO:0051974)	13	1	0.29	+	3.42	0.267	1
regulation of cellular amino acid metabolic process (GO:0006521)	13	1	0.29	+	3.42	0.267	1
regulation of high voltage-gated calcium channel activity (GO:1901841)	13	1	0.29	+	3.42	0.267	1
semaphorin-plexin signaling pathway involved in neuron projection guidance (GO:1902285)	13	1	0.29	+	3.42	0.267	1
protein deacetylation (GO:0006476)	52	4	1.17	+	3.42	0.0345	0.656
development of secondary sexual characteristics (GO:0045136)	13	1	0.29	+	3.42	0.267	1
regulation of bone resorption (GO:0045124)	52	4	1.17	+	3.42	0.0345	0.655
ganglioside biosynthetic process (GO:0001574)	13	1	0.29	+	3.42	0.267	1
epiboly (GO:0090504)	26	2	0.58	+	3.42	0.125	1
cellular response to prostaglandin E stimulus (GO:0071380)	13	1	0.29	+	3.42	0.267	1
cellular response to interleukin-6 (GO:0071354)	26	2	0.58	+	3.42	0.125	1
fatty acid derivative catabolic process (GO:1901569)	13	1	0.29	+	3.42	0.267	1
negative regulation of cell aging (GO:0090344)	26	2	0.58	+	3.42	0.125	1
positive regulation of keratinocyte migration (GO:0051549)	13	1	0.29	+	3.42	0.267	1
positive regulation of oligodendrocyte differentiation (GO:0048714)	26	2	0.58	+	3.42	0.125	1
negative regulation of cholesterol transport (GO:0032375)	13	1	0.29	+	3.42	0.267	1
negative regulation of sterol transport (GO:0032372)	13	1	0.29	+	3.42	0.267	1
intracellular lipid transport (GO:0032365)	26	2	0.58	+	3.42	0.125	1
mitochondrion morphogenesis (GO:0070584)	26	2	0.58	+	3.42	0.125	1
negative regulation of adenylate cyclase-activating G protein-coupled receptor signaling pathway (GO:0106072)	13	1	0.29	+	3.42	0.267	1
regulation of protein localization to endosome (GO:1905666)	13	1	0.29	+	3.42	0.267	1
regulation of cell migration involved in sprouting angiogenesis (GO:0090049)	39	3	0.88	+	3.42	0.0645	0.873
rhythmic process (GO:0048511)	260	20	5.84	+	3.42	4.35e-06	0.00143
reverse cholesterol transport (GO:0043691)	13	1	0.29	+	3.42	0.267	1
bone cell development (GO:0098751)	26	2	0.58	+	3.42	0.125	1
regulation of trophoblast cell migration (GO:1901163)	13	1	0.29	+	3.42	0.267	1
positive regulation of vacuole organization (GO:0044090)	13	1	0.29	+	3.42	0.267	1
regulation of autophagosome maturation (GO:1901096)	13	1	0.29	+	3.42	0.267	1
positive regulation of autophagy of mitochondrion in response to mitochondrial depolarization (GO:1904925)	13	1	0.29	+	3.42	0.267	1
regulation of cellular carbohydrate catabolic process (GO:0043471)	13	1	0.29	+	3.42	0.267	1
cytoplasmic sequestering of transcription factor (GO:0042994)	13	1	0.29	+	3.42	0.267	1
negative regulation of vascular endothelial growth factor receptor signaling pathway (GO:0030948)	13	1	0.29	+	3.42	0.267	1
somatic stem cell division (GO:0048103)	13	1	0.29	+	3.42	0.267	1
regulation of cyclase activity (GO:0031279)	39	3	0.88	+	3.42	0.0645	0.872
ceramide transport (GO:0035627)	13	1	0.29	+	3.42	0.267	1
regulation of developmental pigmentation (GO:0048070)	13	1	0.29	+	3.42	0.267	1
very long-chain fatty acid biosynthetic process (GO:0042761)	13	1	0.29	+	3.42	0.267	1
zinc ion homeostasis (GO:0055069)	26	2	0.58	+	3.42	0.125	1
nucleoside diphosphate catabolic process (GO:0009134)	13	1	0.29	+	3.42	0.267	1
negative regulation of substrate adhesion-dependent cell spreading (GO:1900025)	13	1	0.29	+	3.42	0.267	1
glycolytic process through fructose-6-phosphate (GO:0061615)	13	1	0.29	+	3.42	0.267	1
cell-substrate junction organization (GO:0150115)	39	3	0.88	+	3.42	0.0645	0.871
melanin biosynthetic process (GO:0042438)	13	1	0.29	+	3.42	0.267	1
serotonin metabolic process (GO:0042428)	13	1	0.29	+	3.42	0.267	1
vasodilation (GO:0042311)	39	3	0.88	+	3.42	0.0645	0.87
positive regulation of macrophage derived foam cell differentiation (GO:0010744)	13	1	0.29	+	3.42	0.267	1
regulation of transcription from RNA polymerase II promoter in response to hypoxia (GO:0061418)	13	1	0.29	+	3.42	0.267	1
endocrine hormone secretion (GO:0060986)	13	1	0.29	+	3.42	0.267	1
cardiac vascular smooth muscle cell differentiation (GO:0060947)	13	1	0.29	+	3.42	0.267	1
regulation of mitochondrial fusion (GO:0010635)	13	1	0.29	+	3.42	0.267	1
chondroitin sulfate metabolic process (GO:0030204)	26	2	0.58	+	3.42	0.125	1
programmed cell death involved in cell development (GO:0010623)	13	1	0.29	+	3.42	0.267	1
sphingoid biosynthetic process (GO:0046520)	13	1	0.29	+	3.42	0.267	1
sphingosine biosynthetic process (GO:0046512)	13	1	0.29	+	3.42	0.267	1
positive regulation of activated T cell proliferation (GO:0042104)	26	2	0.58	+	3.42	0.125	1
renal filtration (GO:0097205)	13	1	0.29	+	3.42	0.267	1
cellular response to hydroxyurea (GO:0072711)	13	1	0.29	+	3.42	0.267	1
short-chain fatty acid metabolic process (GO:0046459)	13	1	0.29	+	3.42	0.267	1
striated muscle hypertrophy (GO:0014897)	39	3	0.88	+	3.42	0.0645	0.87
microtubule anchoring (GO:0034453)	26	2	0.58	+	3.42	0.125	1
regulation of cytokine biosynthetic process (GO:0042035)	13	1	0.29	+	3.42	0.267	1
negative regulation of heart rate (GO:0010459)	13	1	0.29	+	3.42	0.267	1
negative regulation of steroid metabolic process (GO:0045939)	26	2	0.58	+	3.42	0.125	1
negative regulation of vasoconstriction (GO:0045906)	13	1	0.29	+	3.42	0.267	1
positive regulation of amyloid precursor protein catabolic process (GO:1902993)	26	2	0.58	+	3.42	0.125	1
mammary gland duct morphogenesis (GO:0060603)	39	3	0.88	+	3.42	0.0645	0.869
negative regulation of fatty acid oxidation (GO:0046322)	13	1	0.29	+	3.42	0.267	1
regulation of glial cell apoptotic process (GO:0034350)	13	1	0.29	+	3.42	0.267	1
regulation of dendritic cell cytokine production (GO:0002730)	13	1	0.29	+	3.42	0.267	1
negative regulation of cell growth involved in cardiac muscle cell development (GO:0061052)	13	1	0.29	+	3.42	0.267	1
neurotransmitter-gated ion channel clustering (GO:0072578)	13	1	0.29	+	3.42	0.267	1
Notch signaling pathway (GO:0007219)	118	9	2.65	+	3.39	0.002	0.118
protein localization to cell junction (GO:1902414)	105	8	2.36	+	3.39	0.00351	0.167
actin filament-based movement (GO:0030048)	92	7	2.07	+	3.39	0.00622	0.227
regulation of protein tyrosine kinase activity (GO:0061097)	79	6	1.77	+	3.38	0.0111	0.331
T cell differentiation in thymus (GO:0033077)	66	5	1.48	+	3.37	0.02	0.48
regulation of morphogenesis of a branching structure (GO:0060688)	66	5	1.48	+	3.37	0.02	0.479
eye photoreceptor cell differentiation (GO:0001754)	53	4	1.19	+	3.36	0.0365	0.681
regulation of vasoconstriction (GO:0019229)	80	6	1.8	+	3.34	0.0117	0.341
positive regulation of signaling receptor activity (GO:2000273)	40	3	0.9	+	3.34	0.0682	0.83
stress-activated MAPK cascade (GO:0051403)	80	6	1.8	+	3.34	0.0117	0.341
regulation of response to reactive oxygen species (GO:1901031)	40	3	0.9	+	3.34	0.0682	0.829
regulation of reactive oxygen species biosynthetic process (GO:1903426)	107	8	2.4	+	3.33	0.00391	0.173
regulation of morphogenesis of an epithelium (GO:1905330)	67	5	1.51	+	3.32	0.0211	0.5
regulation of blood vessel endothelial cell migration (GO:0043535)	94	7	2.11	+	3.31	0.00692	0.239
locomotory behavior (GO:0007626)	242	18	5.44	+	3.31	1.99e-05	0.00454
positive regulation of bone resorption (GO:0045780)	27	2	0.61	+	3.3	0.133	1
branching involved in mammary gland duct morphogenesis (GO:0060444)	27	2	0.61	+	3.3	0.133	1
positive regulation of myoblast differentiation (GO:0045663)	27	2	0.61	+	3.3	0.133	1
positive regulation of erythrocyte differentiation (GO:0045648)	27	2	0.61	+	3.3	0.133	1
small GTPase mediated signal transduction (GO:0007264)	216	16	4.85	+	3.3	5.95e-05	0.0103
T cell lineage commitment (GO:0002360)	27	2	0.61	+	3.3	0.133	1
granulocyte chemotaxis (GO:0071621)	81	6	1.82	+	3.3	0.0123	0.352
cellular response to lipoprotein particle stimulus (GO:0071402)	27	2	0.61	+	3.3	0.133	1
phosphatidylinositol dephosphorylation (GO:0046856)	27	2	0.61	+	3.3	0.133	1
positive regulation of protein maturation (GO:1903319)	27	2	0.61	+	3.3	0.133	1
negative regulation of axonogenesis (GO:0050771)	68	5	1.53	+	3.27	0.0222	0.521
inorganic anion transmembrane transport (GO:0098661)	68	5	1.53	+	3.27	0.0222	0.521
branching involved in blood vessel morphogenesis (GO:0001569)	41	3	0.92	+	3.26	0.0721	0.854
cellular pigmentation (GO:0033059)	41	3	0.92	+	3.26	0.0721	0.853
muscle hypertrophy (GO:0014896)	41	3	0.92	+	3.26	0.0721	0.853
olfactory lobe development (GO:0021988)	41	3	0.92	+	3.26	0.0721	0.852
positive regulation of heart contraction (GO:0045823)	41	3	0.92	+	3.26	0.0721	0.851
localization within membrane (GO:0051668)	96	7	2.16	+	3.25	0.00768	0.258
regulation of muscle organ development (GO:0048634)	55	4	1.24	+	3.24	0.0406	0.737
non-motile cilium assembly (GO:1905515)	55	4	1.24	+	3.24	0.0406	0.736
negative regulation of Ras protein signal transduction (GO:0046580)	55	4	1.24	+	3.24	0.0406	0.736
vesicle cytoskeletal trafficking (GO:0099518)	69	5	1.55	+	3.23	0.0234	0.531
positive regulation of macroautophagy (GO:0016239)	69	5	1.55	+	3.23	0.0234	0.53
response to hypoxia (GO:0001666)	194	14	4.36	+	3.21	0.000219	0.0272
positive regulation of blood pressure (GO:0045777)	56	4	1.26	+	3.18	0.0428	0.748
positive regulation of action potential (GO:0045760)	14	1	0.31	+	3.18	0.284	1
aldehyde catabolic process (GO:0046185)	14	1	0.31	+	3.18	0.284	1
response to growth hormone (GO:0060416)	14	1	0.31	+	3.18	0.284	1
positive regulation of toll-like receptor signaling pathway (GO:0034123)	28	2	0.63	+	3.18	0.14	1
positive regulation of macrophage differentiation (GO:0045651)	14	1	0.31	+	3.18	0.284	1
negative regulation of erythrocyte differentiation (GO:0045647)	14	1	0.31	+	3.18	0.284	1
cell adhesion mediated by integrin (GO:0033627)	28	2	0.63	+	3.18	0.14	1
mononuclear cell differentiation (GO:1903131)	14	1	0.31	+	3.18	0.284	1
innervation (GO:0060384)	28	2	0.63	+	3.18	0.14	1
retrograde vesicle-mediated transport, Golgi to endoplasmic reticulum (GO:0006890)	42	3	0.94	+	3.18	0.076	0.888
RNA decapping (GO:0110154)	14	1	0.31	+	3.18	0.284	1
dicarboxylic acid transport (GO:0006835)	56	4	1.26	+	3.18	0.0428	0.748
zinc ion transport (GO:0006829)	28	2	0.63	+	3.18	0.14	1
neural tube patterning (GO:0021532)	42	3	0.94	+	3.18	0.076	0.887
positive regulation of cell-matrix adhesion (GO:0001954)	56	4	1.26	+	3.18	0.0428	0.747
endothelial cell development (GO:0001885)	56	4	1.26	+	3.18	0.0428	0.746
female mating behavior (GO:0060180)	14	1	0.31	+	3.18	0.284	1
glycosylceramide metabolic process (GO:0006677)	14	1	0.31	+	3.18	0.284	1
inhibitory postsynaptic potential (GO:0060080)	14	1	0.31	+	3.18	0.284	1
pharyngeal system development (GO:0060037)	28	2	0.63	+	3.18	0.14	1
otic vesicle development (GO:0071599)	14	1	0.31	+	3.18	0.284	1
multi-organism cellular process (GO:0044764)	14	1	0.31	+	3.18	0.284	1
negative regulation of monooxygenase activity (GO:0032769)	14	1	0.31	+	3.18	0.284	1
positive regulation of interleukin-13 production (GO:0032736)	14	1	0.31	+	3.18	0.284	1
regulation of neuron maturation (GO:0014041)	14	1	0.31	+	3.18	0.284	1
regulation of circadian sleep/wake cycle, non-REM sleep (GO:0045188)	14	1	0.31	+	3.18	0.284	1
positive regulation of hepatocyte proliferation (GO:2000347)	14	1	0.31	+	3.18	0.284	1
regulation of NMDA receptor activity (GO:2000310)	28	2	0.63	+	3.18	0.14	1
negative thymic T cell selection (GO:0045060)	14	1	0.31	+	3.18	0.284	1
positive thymic T cell selection (GO:0045059)	14	1	0.31	+	3.18	0.284	1
negative regulation of signaling receptor activity (GO:2000272)	28	2	0.63	+	3.18	0.14	1
potassium ion import across plasma membrane (GO:1990573)	42	3	0.94	+	3.18	0.076	0.887
histamine transport (GO:0051608)	14	1	0.31	+	3.18	0.284	1
regulation of hematopoietic progenitor cell differentiation (GO:1901532)	28	2	0.63	+	3.18	0.14	1
response to interleukin-6 (GO:0070741)	28	2	0.63	+	3.18	0.14	1
regulation of DNA methylation-dependent heterochromatin assembly (GO:0090308)	14	1	0.31	+	3.18	0.284	1
trans-synaptic signaling, modulating synaptic transmission (GO:0099550)	14	1	0.31	+	3.18	0.284	1
positive regulation of multicellular organism growth (GO:0040018)	42	3	0.94	+	3.18	0.076	0.886
histone H4-K16 acetylation (GO:0043984)	14	1	0.31	+	3.18	0.284	1
acetyl-CoA biosynthetic process (GO:0006085)	14	1	0.31	+	3.18	0.284	1
fructose 6-phosphate metabolic process (GO:0006002)	14	1	0.31	+	3.18	0.284	1
organelle membrane fusion (GO:0090174)	84	6	1.89	+	3.18	0.0144	0.39
regulation of sphingolipid biosynthetic process (GO:0090153)	14	1	0.31	+	3.18	0.284	1
positive regulation of collateral sprouting (GO:0048672)	14	1	0.31	+	3.18	0.284	1
embryonic pattern specification (GO:0009880)	70	5	1.57	+	3.18	0.0247	0.548
regulation of lyase activity (GO:0051339)	42	3	0.94	+	3.18	0.076	0.885
Peyer's patch development (GO:0048541)	14	1	0.31	+	3.18	0.284	1
mucosa-associated lymphoid tissue development (GO:0048537)	14	1	0.31	+	3.18	0.284	1
negative regulation of appetite (GO:0032099)	14	1	0.31	+	3.18	0.284	1
regulation of autophagy of mitochondrion in response to mitochondrial depolarization (GO:1904923)	14	1	0.31	+	3.18	0.284	1
dendritic cell migration (GO:0036336)	14	1	0.31	+	3.18	0.284	1
positive regulation of renal sodium excretion (GO:0035815)	14	1	0.31	+	3.18	0.284	1
regulation of amyloid precursor protein biosynthetic process (GO:0042984)	14	1	0.31	+	3.18	0.284	1
polysaccharide catabolic process (GO:0000272)	14	1	0.31	+	3.18	0.284	1
glial cell activation (GO:0061900)	42	3	0.94	+	3.18	0.076	0.885
focal adhesion assembly (GO:0048041)	28	2	0.63	+	3.18	0.14	1
regulation of membrane lipid metabolic process (GO:1905038)	14	1	0.31	+	3.18	0.284	1
response to pH (GO:0009268)	42	3	0.94	+	3.18	0.076	0.884
drug transport (GO:0015893)	14	1	0.31	+	3.18	0.284	1
positive regulation of macrophage activation (GO:0043032)	28	2	0.63	+	3.18	0.14	1
pre-miRNA processing (GO:0031054)	14	1	0.31	+	3.18	0.284	1
vitamin catabolic process (GO:0009111)	14	1	0.31	+	3.18	0.284	1
neuron maturation (GO:0042551)	42	3	0.94	+	3.18	0.076	0.883
negative regulation of cellular response to insulin stimulus (GO:1900077)	42	3	0.94	+	3.18	0.076	0.883
negative regulation of transforming growth factor beta receptor signaling pathway (GO:0030512)	70	5	1.57	+	3.18	0.0247	0.547
telomere capping (GO:0016233)	14	1	0.31	+	3.18	0.284	1
protein localization to microtubule (GO:0035372)	14	1	0.31	+	3.18	0.284	1
fatty acid elongation (GO:0030497)	14	1	0.31	+	3.18	0.284	1
ribonucleoside catabolic process (GO:0042454)	14	1	0.31	+	3.18	0.284	1
regulation of sequestering of triglyceride (GO:0010889)	14	1	0.31	+	3.18	0.284	1
peristalsis (GO:0030432)	14	1	0.31	+	3.18	0.284	1
positive regulation of T cell chemotaxis (GO:0010820)	14	1	0.31	+	3.18	0.284	1
positive regulation of dendrite extension (GO:1903861)	28	2	0.63	+	3.18	0.14	1
negative regulation of cell morphogenesis involved in differentiation (GO:0010771)	14	1	0.31	+	3.18	0.284	1
regulation of protein kinase A signaling (GO:0010738)	28	2	0.63	+	3.18	0.14	1
production of miRNAs involved in gene silencing by miRNA (GO:0035196)	28	2	0.63	+	3.18	0.14	1
cell migration involved in heart development (GO:0060973)	14	1	0.31	+	3.18	0.284	1
monocyte differentiation (GO:0030224)	14	1	0.31	+	3.18	0.284	1
negative regulation of platelet-derived growth factor receptor signaling pathway (GO:0010642)	14	1	0.31	+	3.18	0.284	1
chondroitin sulfate biosynthetic process (GO:0030206)	14	1	0.31	+	3.18	0.284	1
axonal transport of mitochondrion (GO:0019896)	14	1	0.31	+	3.18	0.284	1
regulation of cytoplasmic transport (GO:1903649)	28	2	0.63	+	3.18	0.14	1
activation of cysteine-type endopeptidase activity (GO:0097202)	14	1	0.31	+	3.18	0.284	1
response to hydroxyurea (GO:0072710)	14	1	0.31	+	3.18	0.284	1
positive regulation of striated muscle contraction (GO:0045989)	14	1	0.31	+	3.18	0.284	1
central nervous system neuron axonogenesis (GO:0021955)	42	3	0.94	+	3.18	0.076	0.882
phototransduction (GO:0007602)	28	2	0.63	+	3.18	0.14	1
positive regulation of smooth muscle cell apoptotic process (GO:0034393)	14	1	0.31	+	3.18	0.284	1
regulation of dendritic spine maintenance (GO:1902950)	14	1	0.31	+	3.18	0.284	1
DNA demethylation (GO:0080111)	14	1	0.31	+	3.18	0.284	1
kidney development (GO:0001822)	296	21	6.65	+	3.16	8.12e-06	0.00225
neural crest cell migration (GO:0001755)	57	4	1.28	+	3.12	0.0451	0.697
regulation of myelination (GO:0031641)	57	4	1.28	+	3.12	0.0451	0.696
regulation of postsynaptic membrane neurotransmitter receptor levels (GO:0099072)	57	4	1.28	+	3.12	0.0451	0.696
myelination (GO:0042552)	114	8	2.56	+	3.12	0.00558	0.212
response to decreased oxygen levels (GO:0036293)	200	14	4.49	+	3.12	0.000293	0.0337
negative regulation of protein kinase B signaling (GO:0051898)	43	3	0.97	+	3.11	0.08	0.897
oligodendrocyte development (GO:0014003)	43	3	0.97	+	3.11	0.08	0.896
peptidyl-threonine modification (GO:0018210)	86	6	1.93	+	3.11	0.0159	0.406
phosphatidylinositol phosphorylation (GO:0046854)	43	3	0.97	+	3.11	0.08	0.895
lipid storage (GO:0019915)	43	3	0.97	+	3.11	0.08	0.895
renal system process (GO:0003014)	101	7	2.27	+	3.08	0.00986	0.307
axon guidance (GO:0007411)	231	16	5.19	+	3.08	0.000124	0.0187
regulation of receptor recycling (GO:0001919)	29	2	0.65	+	3.07	0.148	1
regulation of epidermal growth factor-activated receptor activity (GO:0007176)	29	2	0.65	+	3.07	0.148	1
establishment of planar polarity (GO:0001736)	29	2	0.65	+	3.07	0.148	1
positive regulation of stress-activated MAPK cascade (GO:0032874)	116	8	2.61	+	3.07	0.00614	0.226
protein quality control for misfolded or incompletely synthesized proteins (GO:0006515)	29	2	0.65	+	3.07	0.148	1
regulation of endoplasmic reticulum stress-induced intrinsic apoptotic signaling pathway (GO:1902235)	29	2	0.65	+	3.07	0.148	1
sprouting angiogenesis (GO:0002040)	58	4	1.3	+	3.07	0.0474	0.713
regulation of circadian sleep/wake cycle, sleep (GO:0045187)	29	2	0.65	+	3.07	0.148	1
positive regulation of protein deacetylation (GO:0090312)	29	2	0.65	+	3.07	0.148	1
positive regulation of triglyceride metabolic process (GO:0090208)	29	2	0.65	+	3.07	0.148	1
negative regulation of antigen receptor-mediated signaling pathway (GO:0050858)	29	2	0.65	+	3.07	0.148	1
positive regulation of long-term synaptic potentiation (GO:1900273)	29	2	0.65	+	3.07	0.148	1
regulation of histone deacetylation (GO:0031063)	29	2	0.65	+	3.07	0.148	1
regulation of ruffle assembly (GO:1900027)	29	2	0.65	+	3.07	0.148	1
neuron projection guidance (GO:0097485)	232	16	5.21	+	3.07	0.00013	0.0188
protein localization to vacuole (GO:0072665)	58	4	1.3	+	3.07	0.0474	0.712
regulation of cell growth involved in cardiac muscle cell development (GO:0061050)	29	2	0.65	+	3.07	0.148	1
odontogenesis (GO:0042476)	102	7	2.29	+	3.05	0.0103	0.314
female gonad development (GO:0008585)	102	7	2.29	+	3.05	0.0103	0.314
positive regulation of phosphatidylinositol 3-kinase signaling (GO:0014068)	73	5	1.64	+	3.05	0.0286	0.598
regulation of intracellular pH (GO:0051453)	73	5	1.64	+	3.05	0.0286	0.598
coronary vasculature development (GO:0060976)	73	5	1.64	+	3.05	0.0286	0.597
photoreceptor cell differentiation (GO:0046530)	73	5	1.64	+	3.05	0.0286	0.596
ensheathment of neurons (GO:0007272)	117	8	2.63	+	3.04	0.00644	0.232
axon ensheathment (GO:0008366)	117	8	2.63	+	3.04	0.00644	0.231
negative regulation of neuron projection development (GO:0010977)	161	11	3.62	+	3.04	0.00153	0.0975
regulation of vascular permeability (GO:0043114)	44	3	0.99	+	3.03	0.0842	0.924
positive regulation of blood circulation (GO:1903524)	44	3	0.99	+	3.03	0.0842	0.924
anion transmembrane transport (GO:0098656)	191	13	4.29	+	3.03	0.000611	0.0554
Rho protein signal transduction (GO:0007266)	59	4	1.33	+	3.02	0.0497	0.744
positive regulation of stress-activated protein kinase signaling cascade (GO:0070304)	118	8	2.65	+	3.02	0.00675	0.237
glycolipid biosynthetic process (GO:0009247)	59	4	1.33	+	3.02	0.0497	0.743
positive regulation of DNA repair (GO:0045739)	74	5	1.66	+	3.01	0.03	0.612
retina morphogenesis in camera-type eye (GO:0060042)	74	5	1.66	+	3.01	0.03	0.611
regulation of insulin receptor signaling pathway (GO:0046626)	74	5	1.66	+	3.01	0.03	0.611
renal system development (GO:0072001)	311	21	6.99	+	3.01	1.63e-05	0.00379
regulation of endothelial cell migration (GO:0010594)	164	11	3.68	+	2.99	0.00175	0.107
positive regulation of keratinocyte differentiation (GO:0045618)	15	1	0.34	+	2.97	0.299	1
tripartite regional subdivision (GO:0007351)	15	1	0.34	+	2.97	0.299	1
cranial nerve morphogenesis (GO:0021602)	30	2	0.67	+	2.97	0.156	1
tricarboxylic acid metabolic process (GO:0072350)	15	1	0.34	+	2.97	0.299	1
negative regulation of anoikis (GO:2000811)	15	1	0.34	+	2.97	0.299	1
purine nucleoside bisphosphate biosynthetic process (GO:0034033)	30	2	0.67	+	2.97	0.156	1
ribonucleoside bisphosphate biosynthetic process (GO:0034030)	30	2	0.67	+	2.97	0.156	1
positive regulation of regulatory T cell differentiation (GO:0045591)	15	1	0.34	+	2.97	0.299	1
regulation of store-operated calcium entry (GO:2001256)	15	1	0.34	+	2.97	0.299	1
cell differentiation in hindbrain (GO:0021533)	30	2	0.67	+	2.97	0.156	1
postsynaptic membrane organization (GO:0001941)	30	2	0.67	+	2.97	0.156	1
metanephric nephron epithelium development (GO:0072243)	15	1	0.34	+	2.97	0.299	1
regulation of nuclear-transcribed mRNA poly(A) tail shortening (GO:0060211)	15	1	0.34	+	2.97	0.299	1
establishment of tissue polarity (GO:0007164)	30	2	0.67	+	2.97	0.156	1
prepulse inhibition (GO:0060134)	15	1	0.34	+	2.97	0.299	1
phosphatidylcholine biosynthetic process (GO:0006656)	15	1	0.34	+	2.97	0.299	1
nuclear migration (GO:0007097)	30	2	0.67	+	2.97	0.156	1
hair cycle phase (GO:0044851)	15	1	0.34	+	2.97	0.299	1
regulation of protein glycosylation (GO:0060049)	15	1	0.34	+	2.97	0.299	1
convergent extension (GO:0060026)	15	1	0.34	+	2.97	0.299	1
melanin metabolic process (GO:0006582)	15	1	0.34	+	2.97	0.299	1
positive regulation of amino acid transport (GO:0051957)	30	2	0.67	+	2.97	0.156	1
positive regulation of glutamate secretion (GO:0014049)	15	1	0.34	+	2.97	0.299	1
3'-UTR-mediated mRNA stabilization (GO:0070935)	15	1	0.34	+	2.97	0.299	1
production of small RNA involved in gene silencing by RNA (GO:0070918)	30	2	0.67	+	2.97	0.156	1
actin crosslink formation (GO:0051764)	15	1	0.34	+	2.97	0.299	1
secondary metabolite biosynthetic process (GO:0044550)	15	1	0.34	+	2.97	0.299	1
regulation of microvillus organization (GO:0032530)	15	1	0.34	+	2.97	0.299	1
Golgi localization (GO:0051645)	15	1	0.34	+	2.97	0.299	1
histone H4-K8 acetylation (GO:0043982)	15	1	0.34	+	2.97	0.299	1
histone H4-K5 acetylation (GO:0043981)	15	1	0.34	+	2.97	0.299	1
negative regulation of cAMP-mediated signaling (GO:0043951)	30	2	0.67	+	2.97	0.156	1
regulation of keratinocyte migration (GO:0051547)	15	1	0.34	+	2.97	0.299	1
positive regulation of prostaglandin secretion (GO:0032308)	15	1	0.34	+	2.97	0.299	1
regulation of postsynaptic neurotransmitter receptor activity (GO:0098962)	15	1	0.34	+	2.97	0.299	1
positive regulation of axon regeneration (GO:0048680)	15	1	0.34	+	2.97	0.299	1
protein K63-linked deubiquitination (GO:0070536)	30	2	0.67	+	2.97	0.156	1
leukocyte aggregation (GO:0070486)	15	1	0.34	+	2.97	0.299	1
negative regulation of response to nutrient levels (GO:0032108)	15	1	0.34	+	2.97	0.299	1
negative regulation of response to extracellular stimulus (GO:0032105)	15	1	0.34	+	2.97	0.299	1
primary amino compound metabolic process (GO:1901160)	15	1	0.34	+	2.97	0.299	1
regulation of lipoprotein metabolic process (GO:0050746)	15	1	0.34	+	2.97	0.299	1
negative regulation of response to food (GO:0032096)	15	1	0.34	+	2.97	0.299	1
nose development (GO:0043584)	15	1	0.34	+	2.97	0.299	1
positive regulation of phosphatidylinositol 3-kinase activity (GO:0043552)	30	2	0.67	+	2.97	0.156	1
guanosine-containing compound metabolic process (GO:1901068)	30	2	0.67	+	2.97	0.156	1
cytokine secretion (GO:0050663)	15	1	0.34	+	2.97	0.299	1
photoreceptor cell outer segment organization (GO:0035845)	15	1	0.34	+	2.97	0.299	1
regulation of vascular endothelial growth factor receptor signaling pathway (GO:0030947)	30	2	0.67	+	2.97	0.156	1
negative T cell selection (GO:0043383)	15	1	0.34	+	2.97	0.299	1
positive regulation of vesicle fusion (GO:0031340)	15	1	0.34	+	2.97	0.299	1
neurotrophin TRK receptor signaling pathway (GO:0048011)	15	1	0.34	+	2.97	0.299	1
CD8-positive, alpha-beta T cell activation (GO:0036037)	15	1	0.34	+	2.97	0.299	1
positive regulation of nuclear-transcribed mRNA catabolic process, deadenylation-dependent decay (GO:1900153)	15	1	0.34	+	2.97	0.299	1
neuron remodeling (GO:0016322)	15	1	0.34	+	2.97	0.299	1
regulation of response to osmotic stress (GO:0047484)	15	1	0.34	+	2.97	0.299	1
phospholipid homeostasis (GO:0055091)	15	1	0.34	+	2.97	0.299	1
dsRNA processing (GO:0031050)	30	2	0.67	+	2.97	0.156	1
response to caffeine (GO:0031000)	15	1	0.34	+	2.97	0.299	1
magnesium ion homeostasis (GO:0010960)	15	1	0.34	+	2.97	0.299	1
positive regulation of ruffle assembly (GO:1900029)	15	1	0.34	+	2.97	0.299	1
positive regulation of anion transmembrane transport (GO:1903961)	15	1	0.34	+	2.97	0.299	1
serine family amino acid biosynthetic process (GO:0009070)	15	1	0.34	+	2.97	0.299	1
carbohydrate phosphorylation (GO:0046835)	15	1	0.34	+	2.97	0.299	1
progesterone metabolic process (GO:0042448)	15	1	0.34	+	2.97	0.299	1
anterior/posterior axis specification, embryo (GO:0008595)	15	1	0.34	+	2.97	0.299	1
regulation of cholesterol storage (GO:0010885)	15	1	0.34	+	2.97	0.299	1
regulation of complement activation (GO:0030449)	15	1	0.34	+	2.97	0.299	1
positive regulation of phospholipase C activity (GO:0010863)	30	2	0.67	+	2.97	0.156	1
regulation of T cell chemotaxis (GO:0010819)	15	1	0.34	+	2.97	0.299	1
magnesium ion transport (GO:0015693)	15	1	0.34	+	2.97	0.299	1
negative regulation of glycoprotein biosynthetic process (GO:0010561)	15	1	0.34	+	2.97	0.299	1
glucocorticoid metabolic process (GO:0008211)	15	1	0.34	+	2.97	0.299	1
regulation of blood vessel endothelial cell proliferation involved in sprouting angiogenesis (GO:1903587)	15	1	0.34	+	2.97	0.299	1
negative regulation of ATP metabolic process (GO:1903579)	30	2	0.67	+	2.97	0.156	1
mucopolysaccharide metabolic process (GO:1903510)	60	4	1.35	+	2.97	0.0522	0.773
cellular potassium ion homeostasis (GO:0030007)	15	1	0.34	+	2.97	0.299	1
regulation of synaptic vesicle recycling (GO:1903421)	30	2	0.67	+	2.97	0.156	1
short-term memory (GO:0007614)	15	1	0.34	+	2.97	0.299	1
regulation of ER to Golgi vesicle-mediated transport (GO:0060628)	15	1	0.34	+	2.97	0.299	1
positive regulation of cell growth involved in cardiac muscle cell development (GO:0061051)	15	1	0.34	+	2.97	0.299	1
nucleoside bisphosphate biosynthetic process (GO:0033866)	30	2	0.67	+	2.97	0.156	1
olfactory bulb interneuron differentiation (GO:0021889)	15	1	0.34	+	2.97	0.299	1
intestinal epithelial cell development (GO:0060576)	15	1	0.34	+	2.97	0.299	1
negative regulation of necroptotic process (GO:0060546)	15	1	0.34	+	2.97	0.299	1
negative regulation of TOR signaling (GO:0032007)	45	3	1.01	+	2.97	0.0884	0.906
stem cell division (GO:0017145)	45	3	1.01	+	2.97	0.0884	0.906
vesicle transport along microtubule (GO:0047496)	45	3	1.01	+	2.97	0.0884	0.905
fibroblast growth factor receptor signaling pathway (GO:0008543)	45	3	1.01	+	2.97	0.0884	0.905
regulation of glycoprotein biosynthetic process (GO:0010559)	45	3	1.01	+	2.97	0.0884	0.904
phosphatidylinositol metabolic process (GO:0046488)	135	9	3.03	+	2.97	0.00463	0.19
development of primary female sexual characteristics (GO:0046545)	105	7	2.36	+	2.97	0.0119	0.345
positive regulation of peptidyl-tyrosine phosphorylation (GO:0050731)	197	13	4.43	+	2.94	0.0008	0.0651
organelle transport along microtubule (GO:0072384)	76	5	1.71	+	2.93	0.033	0.638
regulation of steroid biosynthetic process (GO:0050810)	76	5	1.71	+	2.93	0.033	0.637
positive regulation of GTPase activity (GO:0043547)	228	15	5.12	+	2.93	0.000336	0.0382
protein localization to synapse (GO:0035418)	76	5	1.71	+	2.93	0.033	0.637
regulation of cell shape (GO:0008360)	152	10	3.41	+	2.93	0.00318	0.159
glycosylation (GO:0070085)	198	13	4.45	+	2.92	0.000836	0.0666
protein glycosylation (GO:0006486)	183	12	4.11	+	2.92	0.00132	0.0895
macromolecule glycosylation (GO:0043413)	183	12	4.11	+	2.92	0.00132	0.0891
positive regulation of lipid metabolic process (GO:0045834)	168	11	3.77	+	2.91	0.00209	0.122
branching involved in ureteric bud morphogenesis (GO:0001658)	46	3	1.03	+	2.9	0.0927	0.937
negative regulation of dephosphorylation (GO:0035305)	92	6	2.07	+	2.9	0.0211	0.5
neuroinflammatory response (GO:0150076)	46	3	1.03	+	2.9	0.0927	0.936
osteoclast differentiation (GO:0030316)	46	3	1.03	+	2.9	0.0927	0.935
anterograde axonal transport (GO:0008089)	46	3	1.03	+	2.9	0.0927	0.935
peptidyl-threonine phosphorylation (GO:0018107)	77	5	1.73	+	2.89	0.0345	0.659
odontogenesis of dentin-containing tooth (GO:0042475)	77	5	1.73	+	2.89	0.0345	0.658
sphingolipid biosynthetic process (GO:0030148)	77	5	1.73	+	2.89	0.0345	0.657
amino acid transmembrane transport (GO:0003333)	77	5	1.73	+	2.89	0.0345	0.657
regulation of axonogenesis (GO:0050770)	185	12	4.16	+	2.89	0.00144	0.0948
positive regulation of smooth muscle cell proliferation (GO:0048661)	108	7	2.43	+	2.88	0.0136	0.374
response to oxygen levels (GO:0070482)	216	14	4.85	+	2.88	0.000603	0.0554
cellular monovalent inorganic cation homeostasis (GO:0030004)	108	7	2.43	+	2.88	0.0136	0.374
potassium ion transmembrane transport (GO:0071805)	139	9	3.12	+	2.88	0.00553	0.21
regulation of GTPase activity (GO:0043087)	309	20	6.94	+	2.88	4.53e-05	0.00812
negative regulation of myoblast differentiation (GO:0045662)	31	2	0.7	+	2.87	0.163	1
regulation of myoblast differentiation (GO:0045661)	62	4	1.39	+	2.87	0.0572	0.818
CD4-positive, alpha-beta T cell differentiation involved in immune response (GO:0002294)	31	2	0.7	+	2.87	0.163	1
detection of mechanical stimulus (GO:0050982)	62	4	1.39	+	2.87	0.0572	0.817
negative regulation of small GTPase mediated signal transduction (GO:0051058)	62	4	1.39	+	2.87	0.0572	0.817
interstrand cross-link repair (GO:0036297)	31	2	0.7	+	2.87	0.163	1
regulation of bone remodeling (GO:0046850)	62	4	1.39	+	2.87	0.0572	0.816
axis elongation (GO:0003401)	31	2	0.7	+	2.87	0.163	1
positive regulation of smooth muscle cell migration (GO:0014911)	62	4	1.39	+	2.87	0.0572	0.815
T-helper cell differentiation (GO:0042093)	31	2	0.7	+	2.87	0.163	1
protein localization to cell surface (GO:0034394)	31	2	0.7	+	2.87	0.163	1
positive regulation of cartilage development (GO:0061036)	31	2	0.7	+	2.87	0.163	1
regulation of epithelial cell migration (GO:0010632)	233	15	5.23	+	2.87	0.000417	0.0439
homophilic cell adhesion via plasma membrane adhesion molecules (GO:0007156)	109	7	2.45	+	2.86	0.0142	0.386
outflow tract morphogenesis (GO:0003151)	78	5	1.75	+	2.85	0.0361	0.675
polyol biosynthetic process (GO:0046173)	47	3	1.06	+	2.84	0.0971	0.962
regulation of extrinsic apoptotic signaling pathway in absence of ligand (GO:2001239)	47	3	1.06	+	2.84	0.0971	0.961
positive regulation of nitric oxide biosynthetic process (GO:0045429)	47	3	1.06	+	2.84	0.0971	0.961
detection of mechanical stimulus involved in sensory perception (GO:0050974)	47	3	1.06	+	2.84	0.0971	0.96
neuron projection organization (GO:0106027)	47	3	1.06	+	2.84	0.0971	0.959
negative regulation of developmental growth (GO:0048640)	126	8	2.83	+	2.83	0.00964	0.304
macromolecule deacylation (GO:0098732)	63	4	1.42	+	2.83	0.0598	0.832
protein deacylation (GO:0035601)	63	4	1.42	+	2.83	0.0598	0.831
regulation of G protein-coupled receptor signaling pathway (GO:0008277)	126	8	2.83	+	2.83	0.00964	0.303
chloride transport (GO:0006821)	95	6	2.13	+	2.81	0.0241	0.537
regulation of fatty acid metabolic process (GO:0019217)	95	6	2.13	+	2.81	0.0241	0.536
regulation of neurotransmitter secretion (GO:0046928)	111	7	2.49	+	2.81	0.0155	0.407
regulation of neurotransmitter transport (GO:0051588)	127	8	2.85	+	2.8	0.0101	0.313
monovalent inorganic cation homeostasis (GO:0055067)	143	9	3.21	+	2.8	0.00656	0.234
embryonic limb morphogenesis (GO:0030326)	143	9	3.21	+	2.8	0.00656	0.233
embryonic appendage morphogenesis (GO:0035113)	143	9	3.21	+	2.8	0.00656	0.233
regulation of cation channel activity (GO:2001257)	175	11	3.93	+	2.8	0.00282	0.147
urogenital system development (GO:0001655)	350	22	7.86	+	2.8	2.9e-05	0.00595
positive regulation of cation channel activity (GO:2001259)	80	5	1.8	+	2.78	0.0393	0.718
cochlea development (GO:0090102)	48	3	1.08	+	2.78	0.102	0.994
regulation of chemotaxis (GO:0050920)	224	14	5.03	+	2.78	0.000843	0.0665
positive regulation of nitric oxide metabolic process (GO:1904407)	48	3	1.08	+	2.78	0.102	0.993
negative regulation of phosphatase activity (GO:0010923)	80	5	1.8	+	2.78	0.0393	0.717
positive regulation of cell morphogenesis involved in differentiation (GO:0010770)	96	6	2.16	+	2.78	0.0251	0.555
[truncated: 13,784 more rows]

## Sheet: B cells markers
genes
Maff
Zfp36
Bex4
Lgals3
Anxa2
Rps15a-ps5
Egr2
Gm11361
Tspo
Rpl23a-ps3
Rps11-ps2
Cstb
Snhg1
Gm26887
2410006H16Rik
Urah
1700030F04Rik
Gm10443
Gm15210
Trmt112
Kcne1l
Gm12222
Rpl36-ps2
Gm26669
Gm10232
RP23-184H3.5
Rpl39
Rpl13a
Rpl6l
Cenpx
Emd
Rassf1
Lmna
Klf2
Bex1
H1fx
Pim3
Rps27a-ps2
Atg101
Fxyd6
Ubald1
Taf7
1110038B12Rik
Serf1
Cetn2
Rps27a
Pard6a
Prmt1
Gm15459
Gadd45b
Gm6394
Gm12481
Ascl1
Rpl9-ps7
Eif1a
Alyref
Gm13611
Sh3bgrl3
Tbl3
Bag1
Ebna1bp2
Bola2
Gm10263
Rpl22-ps1
Rpl18
S100a4
Epb41l4aos
Psmg4
Gm5812
Mlf1
Rps28
Ppp1r1a
Cdkn2aip
Wdr83os
Prpf38a
Mfap2
Gm4540
Snhg15
Rpl28
Gm14820
Gm4204
Bod1
Fundc2
Rab13
Gltscr2
Sde2
Ost4
Rpl15
Ftl1-ps1
Sertad1
Rcn3
Rplp2
Nhp2
Gm2225
Notum
Slc24a5
Gm5644
Zfas1
Psme1
Rpl7
Gm26532
Lsm4
Rpl18a
Irf1
Gm8624
Enkur
Gm13502
Socs3
Pafah1b3
Apex1
Pim1
Larp7
Rps12-ps3
Gsn
Gm12989
Nolc1
Gm13268
2810025M15Rik
Pak3
Dnajc9
Hes6
Siva1
Gm45193
Rpl7a
Als2cr12
Nabp2
Nes
Use1
Frat2
Denr
Llph
Eif4a-ps4
Oard1
Hspd1-ps3
Dctpp1
Eif3i
Rpsa-ps12
Znrd1
Arc
Gm13456
Gm7266
Gpx1
Rps18
Atp1a1
Nr4a2
Polr2h
Nsg1
Gm12183
Eif3g
Snhg12
Gm6977
Gm14681
Rps15-ps2
Gsx2
Ncbp2
Tspan18
Tmem258
Rnaseh2c
Bambi
Rdm1
Psmc3ip
Gm28727
Tceal1
Ufm1
Nt5dc2
Dusp8
Tpm4
Gm10080
Brix1
Tceal3
Rps13-ps1
Rcn1
1700086L19Rik
Mrpl21
Leng1
Rpl6
Pdcl3
Trnau1ap
1110032A03Rik
Gar1
1110004E09Rik
Tex14
Ifitm3
Nudc
Oxnad1
Rnf26
Dut
Nbl1
Aimp1
Irak1bp1
Gm5844
Abt1
Gm12696
Gm12669
Gnl3
Lage3
Rbmxl1
Dnttip2
Ssna1
Mns1
Riiad1
Atf5
Sap30
Pole3
Gm26836
Nfatc2
Snrpf
Exosc5
Nol12
Srf
Gm9531
Mrpl54
Stoml2
Ptx3
Polr1c
Lsm3
Tmem178
Zcchc9
RP24-389J11.1
Rsl24d1
Mrpl13
Gm9625
Ccdc124
Tdpx-ps1
Plekhj1
Sec22b
Gm13680
Toporsos
Skil
Sssca1
Hypk
Snhg5
Ruvbl1
Eif3k
Gstm7
Gm9727
Myl9
Rac3
Gm12715
Rpl37a
Rpl21-ps8
Gm5835
1700016P03Rik
4930453N24Rik
Gm9769
Tmem106c
Qdpr
Gtf2b
Akr7a5
Rpl10a
RP23-454I20.1
Rps17
Eif3s6-ps1
Ctxn1
Hspa1a
Dusp10
Lsm5
Tctex1d2
Gm8121
Dync2li1
Zfp622
Rrp15
Pfdn4
Gng3
Trappc6a
Fam96a
Mrpl52
Gm11826
Cenpq
Trmt10c
Bola3
Prps1
Efnb1
Sv2c
Gm7332
Med10
2900060B14Rik
Isy1
Emp1
Cox6b2
Gm10704
Ptgds
Lsm2
Ing1
Pdlim7
Pcbd1
Nradd
Pipox
Glod4
Acp1
Mcm7
Vnn1
Ccpg1os
Timm21
Dpm2
Rhoc
Ensa
Txn-ps1
Eef2kmt
Lsm8
Timm17b
Maz
Sdhaf4
Rpp14
Gtf3c6
Nip7
Tpm3-rs7
Rpp38
2310009A05Rik
Commd8
Lrrtm2
Cfap126
Timm8a1
Yeats4
B9d1
Arl4c
Perp
Pygl
Zfp422
Rpl36
Ass1
Gm4799
Cbx8
Nop16
Otud1
Polr2d
Gm29260
Pfdn6
Armcx3
Ap1s2
Taf11
Fam210b
Ybx1-ps2
RP23-139H6.1
Gm26733
Nat14
Krt10
Rbm17
Gm6485
Opa3
Gm10563
Gamt
Thop1
Smco4
Gm26904
Arf2
Gins4
Gm17018
Ddx21
Coro1c
H2afx
Vti1b
Rgs2
Tnfrsf12a
Exosc3
Nifk
Crlf1
Gm4950
Srm
Pdgfa
Snrnp40
Faim
Polr2k
Kcnh7
Usp36
Gm26735
Cdca7
Lrrc59
Hat1
Commd2
Mrpl35
Fam174a
Cwc25
Polr2i
Snrpa1
Slu7
Elp5
Myg1
Pdcd5
Bola1
Klf10
Tmem183a
Rps23
Mknk2
Josd2
Gm5566
Eif4a3
Mex3d
Trip6
Ccndbp1
Tmem107
Prpf31
Erf
Dynlt1f
Zfp330
Pou2f3
Hspb6
Gng2
Pja1
Tmem198
Brms1
Fas
0610037L13Rik
Bad
Podxl2
Isoc1
Sf3b4
Tmem216
Gm7964
Mzt2
Tsnax
Dnaja4
Gm11675
Gtf2f1
Vps72
Rnf138rt1
Gm13008
Mettl1
Bag2
9330111N05Rik
Gnl1
Tead2
1110008P14Rik
Gemin7
Tcea1-ps1
Mcrs1
Crip1
Dll1
Lcmt2
Bgn
Gm3150
Rps12
Rpl7a-ps12
C1qtnf4
Ttc32
Nelfe
Trim27
Arl6
Nudt10
RP23-356P21.1
Il17d
Lyar
Akt1s1
Spg21
Snrpb2
Gm5617
Egln3
Rfxap
Ier3ip1
Psmd10
Cd82
Fam103a1
Pip5k1b
Aktip
Gm10093
Ddx18
Sh3gl1
Abhd15
Gm1821
Mycn
Gfer
Spty2d1
Mrpl9
Pifo
Rps4x-ps
Gm12966
4921524J17Rik
Gm15773
Twistnb
Gm2810
Bloc1s4
Thoc3
Mrpl4
Chchd7
Necab2
Rfc2
Gm14164
A430005L14Rik
Phpt1
Trmt10a
Aip
Gm37240
Ccdc86
Stard3nl
Trim59
2210013O21Rik
Gm21954
Fam96b
Tspyl1
Lsm7
Nt5c3b
2810001G20Rik
Ubfd1
Rab10os
Ntmt1
Mrpl38
Rrp7a
Shisa2
Nfil3
Ythdf2
D030056L22Rik
Kin
Zbtb12
Tmem261
Tmem230
Gadd45gip1
Rwdd4a
Mphosph10
Eef1e1
Timm22
Rcc2
Gm7816
Mgat4b
Ap1s1
Uchl1
Gm11539
Gm19412
Airn
Fau
Bcl7c
Cd3eap
Med8
Gm10131
Praf2
Zcrb1
Lcmt1
Cnpy4
Rlbp1
Gm20501
Gm17208
RP24-314J18.1
Tagln2
Ckap4
Gbp2
Smn1
Rpl3-ps2
Slc25a39
Snhg6
Faap20
Ino80b
Mrpl50
Plp2
C1ql1
Arpc4
Pbdc1
Dkc1
Lsg1
Bccip
Fam3c
Epha3
Timm50
Hint2
Sowahc
Mrpl32
Aif1l
Usp50
Gm15776
Apoc1
Gm10282
Trim5
Gla
Mest
Hmgn5
Dusp18
Mrpl49
Zswim7
Tfam
Gm20470
Lrrc51
Foxj1
Tspan13
Upf3a
Fam50a
Cxcr4
Arpc1b
Adamts1
Mfap1b
Ppan
Thumpd1
Gm7434
Rpl31-ps8
Gm2830
Polr3d
S100a10
Etfbkmt
Vamp7
Gm14706
Zfp593
Ecel1
Mad2l2
Dleu7
Nfkbil1
Tsr2
Gm12693
Thyn1
Rnf138
Irf2bp1
Dnah7a
Zpr1
Fxyd7
Dguok
Nxt2
Ctps
Coq7
Rgs16
Lmnb1
Phb
Sf3a3
Ppm1g
Eif3l
Srxn1
Tspan6
BC003965
Gcdh
Zfp637
Yrdc
Gm5424
Babam1
Itpa
Ddx41
Mrps30
Rsph1
Jmjd6
Trmt112-ps2
Smyd2
A330048O09Rik
Tmem167b
Gm10052
Utp14a
Tnfaip1
Chd3os
Gm5914
Jag1
Mkrn1
Gm7027
Gm6286
Tgif2
Carnmt1
Eif3b
Mrpl16
Naa38
Gas5
Ppp2r2d
Tsen15
Pofut2
Cope
Samm50
Snhg18
Dnlz
Gtf3a
D130020L05Rik
BC023719
Ruvbl2
Katna1
Thap12
Cebpzos
Nit2
Gm26694
2810004N23Rik
Gm5616
2210016F16Rik
Uqcrh-ps1
Pkp2
1110038F14Rik
Kxd1
Gm6851
Rrm2b
Rfc3
Mrpl57
Ccdc112
Srcin1
Dohh
Gm7901
Mex3a
Nagk
Gadd45a
Iah1
Gm11221
Gm16379
Rpf2
Ctnnbip1
Gm28198
Cks1b
Surf2
Creld2
Sdhaf1
1700088E04Rik
Nme4
Nxt1
Rnf34
Eloa
Trp53
Acd
Hist1h4d
Urod
Rpl37
Wdr18
Dxo
Cyb5r3
Pcna
Gm20768
Gm6085
Ddx39
Col5a2
Wdr46
Cpxm1
Dnal4
Gm26668
Ccdc85b
2310033P09Rik
Hspb11
Commd7
Fundc1
9130401M01Rik
Rpl5
Trmt61b
Dyrk3
Nop14
Imp4
Rars
Pgrmc2
Rpl13a-ps1
Gm7730
Otud6b
Ppie
Dnajb13
Rps19bp1
Trappc1
Mesdc2
BC026585
Prag1
Mak16
Pddc1
Gm26551
Lyrm2
Rab8a
Mfsd4a
Anapc15
Crybb1
Pdcd2
Rbm20
Rae1
Rpl35a
Nsa2
Akr1b3
Mrpl22
Stk11
Tipin
Polr3k
Nob1
Prelid1
Hirip3
Gm5881
2300009A05Rik
Zyx
Fam84a
Nipsnap3b
Cops7a
Pycr2
Etaa1os
Thoc6
Zcchc10
Gm37401
Psmd9
Cenpv
Gm42439
Gsk3a
Utp3
Sertad3
Dctn6
Mphosph6
Gm13443
6030419C18Rik
Gm7846
Gmppb
Igbp1
Gm9825
Ing2
Gm12174
Borcs6
Dynlt1-ps1
Gm4895
Gsto1
Cox17
Med9
Med4
Dpp6
Tln1
Rpain
Snrnp25
H2afy2
Mob3a
Rpl38
Tada3
Cetn4
Slc35a1
Gm8894
Gm6225
Otulin
Tma16
Znhit1
Islr
Tmem242
Ppp2r3c
Lrrc42
Peg10
Rpa3
Prorsd1
Fam136a
Cdk6
Chmp2b
9530068E07Rik
Ftsj1
Rps21
Piga
Sap30bp
Rpl9
Rpp30
L3hypdh
Neto2
Hars
Gm11914
Nat9
Capsl
Prdx3
Cluap1
Mcm6
Ogfr
Umps
Ube2g2
Sms
Eif3m
Siah2
Dbnl
Mrps12
Ddx54
Ddx52
Bloc1s2
Pycrl
Epb41
Eef1akmt1
Gart
Med22
Eid2
Pde1b
Fam118a
Wdr43
Itgb1bp1
Zfp560
Mrto4
Rtfdc1
Camk1
A930005G22Rik
Cyth2
2410004P03Rik
Npm3
Gm3375
Gm26916
Nell2
Dhfr
Ier5l
Rfk
Ppil3
Zfp830
Phlda1
Nuf2
Tspan33
Znhit3
Frg1
Tro
Gm14277
Ttc33
Cxx1a
Eif4e2
Arhgap6
Fam216a
Tsfm
Rangap1
Ece2
Elk3
Mrpl40
Prim1
Fbxl14
Nfe2l1
GFP
Gm11560
Ngrn
Ppp2cb
Uchl4
Ptrhd1
Dcakd
Trib1
Csnk1g2
1010001B22Rik
Psmg1
1110012L19Rik
Klhdc8b
1600010M07Rik
Flna
Pigf
Tekt1
Rccd1
Parl
Pabpc4
Mrpl19
Tbc1d17
Mxra8
Tmem263
Cxxc1
Txnrd1
Zrsr2
Cic
Rpl12
Bricd5
Pih1d2
Arf6
Gm28376
Rpf1
Gm14494
Pqbp1
Mybbp1a
Zcchc17
Rap2a
1810043G02Rik
2310009B15Rik
2310010J17Rik
Isca1
Dscaml1
Eif4b
Ptrh2
Vps37d
Utp18
Gm7936
Nfyb
Actl6a
Tdrkh
Gm4202
Sh3bp1
Thbs3
Rnf2
Fosl2
Commd4
Gm26518
Nkd1
Ccl27a
Prr13
4921511C10Rik
Toe1
Sec13
Exosc9
Alkbh6
Kitl
Tomm34
Acat2
Iqcc
Nup35
RP23-151L20.6
Traf4
Nicn1
Chchd5
Fez2
Ftsj3
Ak6
Mrps11
Dnmt1
Med30
Socs1
Gm26699
Tmem238
Spcs2-ps
Fzd8
Ppp1r7
Gpn3
Acyp1
Htatsf1
Aasdhppt
Borcs8
Cryz
D730003I15Rik
Rab39b
Meig1
Gm11223
Ccdc114
Bcl11a
Ppp1r35
RP24-496O17.9
Spsb2
Nkx6-2
Lbh
E130317F20Rik
Mul1
Msl3l2
Gm37988
Vps18
B9d2
Sap18
Nmd3
Ube2s
Ten1
Pus3
Me3
1700021F05Rik
Srrd
Dbn1
Alkbh1
Ngdn
Rps13
Cebpg
Rad23a
Lig1
Dcaf7
Rbm22
Slc35e1
Arfrp1
Ubxn2a
Galk1
Msantd4
Wdr34
Zfp367
Med7
Sp5
Thap11
Seh1l
Tox4
Rbbp9
Ninj1
Fam183b
Snapc1
Flot1
Fcrla
Gpx4
Chmp3
Gnb5
Tmem232
Dusp3
Enpp4
Gtf2h1
Gm9774
Coprs
4930470G03Rik
Taf10
Fbxo36
Nop56
Ormdl2
Egln2
Aimp2
Nr2f6
Cmas
Dap
Cdkn1a
Ildr2
Cenpp
Lima1
Efcab2
Cxx1b
Pde12
Pdcd11
Gm44686
Gyg
B3gat2
Usp1
Rpa2
Fam58b
Fbln2
Ppm1d
Nub1
Pef1
Rragd
Dlx2
Rrs1
Gm11273
Exosc1
A2m
Csrp2
Ctdsp1
Mcm4
Rhcg
Stxbp5l
Rnmt
Hspa1b
Rilpl2
Plin2
Gm44670
Dhps
Idnk
Slc25a38
9330162G02Rik
BC003331
Jph1
Polg2
Parp1
0610009L18Rik
Bcl7b
Rbbp8
Washc5
Nme5
5330434G04Rik
Farsa
Sh3d21
Terf2ip
Elavl2
Gpc4
Hsd17b7
Abcb1b
Cinp
Tbx20
Elavl3
Ulk4
Slc6a6
C1ql3
Baz1a
Pls1
Gm15489
Nab1
Gm9844
Dlx1
Ell2
Cx3cr1
Gm45184
Kcnq1ot1
Lrrfip1

## Sheet: B cells GO terms
go	ref	obs	expected	pos.neg	fold.enrich	raw.p.value	fdr
positive regulation of central tolerance induction (GO:0002648)	1	1	0.04	+	24.76	0.0761	1
regulation of central tolerance induction (GO:0002646)	1	1	0.04	+	24.76	0.0761	1
L-lysine catabolic process to acetyl-CoA (GO:0019474)	1	1	0.04	+	24.76	0.0761	1
negative regulation of ATP citrate synthase activity (GO:2000984)	1	1	0.04	+	24.76	0.0761	1
regulation of ATP citrate synthase activity (GO:2000983)	1	1	0.04	+	24.76	0.0761	1
galactitol metabolic process (GO:0019402)	1	1	0.04	+	24.76	0.0761	1
neuroblast fate determination (GO:0007400)	1	1	0.04	+	24.76	0.0761	1
cerebellar molecular layer formation (GO:0021688)	1	1	0.04	+	24.76	0.0761	1
rhombomere 5 formation (GO:0021666)	1	1	0.04	+	24.76	0.0761	1
rhombomere 5 structural organization (GO:0021665)	1	1	0.04	+	24.76	0.0761	1
rhombomere 5 morphogenesis (GO:0021664)	1	1	0.04	+	24.76	0.0761	1
rhombomere 3 formation (GO:0021660)	1	1	0.04	+	24.76	0.0761	1
rhombomere 3 structural organization (GO:0021659)	1	1	0.04	+	24.76	0.0761	1
positive regulation of single-stranded telomeric DNA binding (GO:0060381)	1	1	0.04	+	24.76	0.0761	1
regulation of single-stranded telomeric DNA binding (GO:0060380)	1	1	0.04	+	24.76	0.0761	1
dUTP catabolic process (GO:0046081)	1	1	0.04	+	24.76	0.0761	1
dUTP metabolic process (GO:0046080)	1	1	0.04	+	24.76	0.0761	1
dCTP metabolic process (GO:0046065)	1	1	0.04	+	24.76	0.0761	1
regulation of adenylate cyclase-inhibiting adrenergic receptor signaling pathway (GO:0071877)	1	1	0.04	+	24.76	0.0761	1
rhombomere structural organization (GO:0021595)	1	1	0.04	+	24.76	0.0761	1
rhombomere formation (GO:0021594)	1	1	0.04	+	24.76	0.0761	1
negative regulation of death-inducing signaling complex assembly (GO:1903073)	1	1	0.04	+	24.76	0.0761	1
regulation of death-inducing signaling complex assembly (GO:1903072)	1	1	0.04	+	24.76	0.0761	1
L-lysine catabolic process to acetyl-CoA via L-pipecolate (GO:0033514)	1	1	0.04	+	24.76	0.0761	1
vesicle-mediated intercellular transport (GO:0110077)	1	1	0.04	+	24.76	0.0761	1
riboflavin metabolic process (GO:0006771)	1	1	0.04	+	24.76	0.0761	1
regulation of timing of subpallium neuron differentiation (GO:0060165)	1	1	0.04	+	24.76	0.0761	1
subpallium neuron fate commitment (GO:0060163)	2	2	0.08	+	24.76	0.00857	0.405
vestibular receptor cell stereocilium organization (GO:0060121)	1	1	0.04	+	24.76	0.0761	1
tRNA demethylation (GO:1990983)	1	1	0.04	+	24.76	0.0761	1
negative regulation of MHC class I biosynthetic process (GO:0045344)	1	1	0.04	+	24.76	0.0761	1
beta-alanine transport (GO:0001762)	1	1	0.04	+	24.76	0.0761	1
CXCL12-activated CXCR4 signaling pathway (GO:0038160)	1	1	0.04	+	24.76	0.0761	1
C-X-C chemokine receptor CXCR4 signaling pathway (GO:0038159)	1	1	0.04	+	24.76	0.0761	1
metabolism by organism of protein in other organism involved in symbiotic interaction (GO:0052418)	1	1	0.04	+	24.76	0.0761	1
metabolism by host of symbiont protein (GO:0052417)	1	1	0.04	+	24.76	0.0761	1
nuclear DNA replication termination (GO:1902317)	1	1	0.04	+	24.76	0.0761	1
establishment of imprinting at mating-type locus (GO:0071516)	1	1	0.04	+	24.76	0.0761	1
positive regulation of deadenylation-independent decapping of nuclear-transcribed mRNA (GO:1901835)	1	1	0.04	+	24.76	0.0761	1
regulation of deadenylation-independent decapping of nuclear-transcribed mRNA (GO:1901834)	1	1	0.04	+	24.76	0.0761	1
FasL biosynthetic process (GO:0045210)	1	1	0.04	+	24.76	0.0761	1
catabolism by organism of protein in other organism involved in symbiotic interaction (GO:0052363)	1	1	0.04	+	24.76	0.0761	1
catabolism by host of symbiont protein (GO:0052362)	1	1	0.04	+	24.76	0.0761	1
cell cycle DNA replication termination (GO:1902294)	1	1	0.04	+	24.76	0.0761	1
positive regulation of intrinsic apoptotic signaling pathway in response to osmotic stress (GO:1902220)	1	1	0.04	+	24.76	0.0761	1
peptidyl-glutamic acid poly-ADP-ribosylation (GO:0018424)	1	1	0.04	+	24.76	0.0761	1
neuroblast fate commitment (GO:0014017)	1	1	0.04	+	24.76	0.0761	1
mitotic sister chromatid biorientation (GO:1990758)	1	1	0.04	+	24.76	0.0761	1
regulation of intermediate filament polymerization or depolymerization (GO:0045108)	1	1	0.04	+	24.76	0.0761	1
peptidyl-lysine hydroxylation to 5-hydroxy-L-lysine (GO:0018395)	1	1	0.04	+	24.76	0.0761	1
termination of RNA polymerase III transcription (GO:0006386)	1	1	0.04	+	24.76	0.0761	1
protein depalmitoleylation (GO:1990697)	1	1	0.04	+	24.76	0.0761	1
postsynaptic neurotransmitter receptor cycle (GO:0099630)	1	1	0.04	+	24.76	0.0761	1
neurotransmitter receptor cycle (GO:0099627)	1	1	0.04	+	24.76	0.0761	1
DNA replication termination (GO:0006274)	1	1	0.04	+	24.76	0.0761	1
dCTP catabolic process (GO:0006253)	1	1	0.04	+	24.76	0.0761	1
negative regulation of adenylate cyclase-inhibiting adrenergic receptor signaling pathway involved in heart process (GO:0140194)	1	1	0.04	+	24.76	0.0761	1
regulation of adenylate cyclase-inhibiting adrenergic receptor signaling pathway involved in heart process (GO:0140193)	1	1	0.04	+	24.76	0.0761	1
peptidyl-alanine modification (GO:0018194)	1	1	0.04	+	24.76	0.0761	1
ITP catabolic process (GO:0006193)	1	1	0.04	+	24.76	0.0761	1
positive regulation of mammary stem cell proliferation (GO:2000103)	1	1	0.04	+	24.76	0.0761	1
regulation of mammary stem cell proliferation (GO:2000101)	1	1	0.04	+	24.76	0.0761	1
site-specific DNA replication termination at RTS1 barrier (GO:0071171)	1	1	0.04	+	24.76	0.0761	1
site-specific DNA replication termination (GO:0071170)	1	1	0.04	+	24.76	0.0761	1
negative regulation of pentose-phosphate shunt (GO:1905856)	1	1	0.04	+	24.76	0.0761	1
U6 2'-O-snRNA methylation (GO:1990438)	1	1	0.04	+	24.76	0.0761	1
snRNA 2'-O-methylation (GO:1990437)	1	1	0.04	+	24.76	0.0761	1
positive regulation of mitochondrial DNA replication (GO:0090297)	1	1	0.04	+	24.76	0.0761	1
CMP-N-acetylneuraminate biosynthetic process (GO:0006055)	1	1	0.04	+	24.76	0.0761	1
N-terminal peptidyl-proline dimethylation (GO:0018016)	1	1	0.04	+	24.76	0.0761	1
N-terminal peptidyl-glycine methylation (GO:0018013)	1	1	0.04	+	24.76	0.0761	1
N-terminal peptidyl-alanine trimethylation (GO:0018012)	1	1	0.04	+	24.76	0.0761	1
N-terminal peptidyl-alanine methylation (GO:0018011)	1	1	0.04	+	24.76	0.0761	1
maintenance of transcriptional fidelity during DNA-templated transcription elongation from RNA polymerase II promoter (GO:0001193)	1	1	0.04	+	24.76	0.0761	1
maintenance of transcriptional fidelity during DNA-templated transcription elongation (GO:0001192)	1	1	0.04	+	24.76	0.0761	1
transcriptional start site selection at RNA polymerase II promoter (GO:0001174)	1	1	0.04	+	24.76	0.0761	1
DNA-templated transcriptional start site selection (GO:0001173)	1	1	0.04	+	24.76	0.0761	1
'de novo' UMP biosynthetic process (GO:0044205)	1	1	0.04	+	24.76	0.0761	1
RNA 5'-cap (guanine-N7)-methylation (GO:0106005)	1	1	0.04	+	24.76	0.0761	1
pre-mRNA catabolic process (GO:1990261)	1	1	0.04	+	24.76	0.0761	1
regulation of transcription from RNA polymerase II promoter in response to DNA damage (GO:1990248)	1	1	0.04	+	24.76	0.0761	1
positive regulation of lung ciliated cell differentiation (GO:1901248)	1	1	0.04	+	24.76	0.0761	1
regulation of lung ciliated cell differentiation (GO:1901246)	1	1	0.04	+	24.76	0.0761	1
negative regulation of convergent extension involved in axis elongation (GO:1901233)	1	1	0.04	+	24.76	0.0761	1
regulation of convergent extension involved in axis elongation (GO:1901232)	1	1	0.04	+	24.76	0.0761	1
positive regulation of non-canonical Wnt signaling pathway via JNK cascade (GO:1901231)	1	1	0.04	+	24.76	0.0761	1
regulation of non-canonical Wnt signaling pathway via JNK cascade (GO:1901229)	1	1	0.04	+	24.76	0.0761	1
negative regulation of development of symbiont involved in interaction with host (GO:0044147)	1	1	0.04	+	24.76	0.0761	1
modulation of development of symbiont involved in interaction with host (GO:0044145)	1	1	0.04	+	24.76	0.0761	1
positive regulation of low-density lipoprotein receptor activity (GO:1905599)	1	1	0.04	+	24.76	0.0761	1
positive regulation of low-density lipoprotein particle receptor binding (GO:1905597)	1	1	0.04	+	24.76	0.0761	1
negative regulation of formation of translation preinitiation complex (GO:1901194)	1	1	0.04	+	24.76	0.0761	1
regulation of formation of translation preinitiation complex (GO:1901193)	1	1	0.04	+	24.76	0.0761	1
RNA polymerase II core complex assembly (GO:1990114)	1	1	0.04	+	24.76	0.0761	1
neuronal stem cell division (GO:0036445)	1	1	0.04	+	24.76	0.0761	1
endonucleolytic cleavage to generate mature 3'-end of SSU-rRNA from (SSU-rRNA, 5.8S rRNA, LSU-rRNA) (GO:0000461)	1	1	0.04	+	24.76	0.0761	1
peptidyl-histidine dephosphorylation (GO:0035971)	1	1	0.04	+	24.76	0.0761	1
stress-induced mitochondrial fusion (GO:1990046)	1	1	0.04	+	24.76	0.0761	1
glycine import into mitochondrion (GO:1904983)	1	1	0.04	+	24.76	0.0761	1
embryonic heart tube elongation (GO:0036306)	1	1	0.04	+	24.76	0.0761	1
mRNA 3'-splice site recognition (GO:0000389)	2	2	0.08	+	24.76	0.00857	0.404
response to methotrexate (GO:0031427)	1	1	0.04	+	24.76	0.0761	1
response to 5-fluorouracil (GO:0036275)	1	1	0.04	+	24.76	0.0761	1
regulation of protein targeting to vacuolar membrane (GO:1900483)	1	1	0.04	+	24.76	0.0761	1
negative regulation of neuron remodeling (GO:1904800)	1	1	0.04	+	24.76	0.0761	1
negative regulation of RNA binding (GO:1905215)	1	1	0.04	+	24.76	0.0761	1
regulation of neuron remodeling (GO:1904799)	1	1	0.04	+	24.76	0.0761	1
positive regulation of myofibroblast differentiation (GO:1904762)	1	1	0.04	+	24.76	0.0761	1
positive regulation of intermediate filament depolymerization (GO:0030844)	1	1	0.04	+	24.76	0.0761	1
regulation of intermediate filament depolymerization (GO:0030842)	1	1	0.04	+	24.76	0.0761	1
positive regulation of granulosa cell apoptotic process (GO:1904710)	1	1	0.04	+	24.76	0.0761	1
FMN biosynthetic process (GO:0009398)	1	1	0.04	+	24.76	0.0761	1
negative regulation of cytoplasmic translational initiation (GO:1904689)	1	1	0.04	+	24.76	0.0761	1
positive regulation of somatic stem cell division (GO:1904677)	1	1	0.04	+	24.76	0.0761	1
regulation of somatic stem cell division (GO:1904675)	1	1	0.04	+	24.76	0.0761	1
negative regulation of actin-dependent ATPase activity (GO:1904622)	1	1	0.04	+	24.76	0.0761	1
regulation of actin-dependent ATPase activity (GO:1904621)	1	1	0.04	+	24.76	0.0761	1
cellular response to monosodium L-glutamate (GO:1904609)	1	1	0.04	+	24.76	0.0761	1
response to monosodium L-glutamate (GO:1904608)	1	1	0.04	+	24.76	0.0761	1
recruitment of mRNA capping enzyme to RNA polymerase II holoenzyme complex (GO:0036031)	1	1	0.04	+	24.76	0.0761	1
Sertoli cell barrier remodeling (GO:0061843)	1	1	0.04	+	24.76	0.0761	1
N-terminal peptidyl-serine trimethylation (GO:0035573)	1	1	0.04	+	24.76	0.0761	1
N-terminal peptidyl-serine dimethylation (GO:0035572)	1	1	0.04	+	24.76	0.0761	1
N-terminal peptidyl-serine methylation (GO:0035570)	1	1	0.04	+	24.76	0.0761	1
N-terminal peptidyl-proline methylation (GO:0035568)	1	1	0.04	+	24.76	0.0761	1
positive regulation of cardioblast proliferation (GO:1905062)	1	1	0.04	+	24.76	0.0761	1
negative regulation of epithelium regeneration (GO:1905042)	1	1	0.04	+	24.76	0.0761	1
positive regulation of threonine-tRNA ligase activity (GO:1905023)	1	1	0.04	+	24.76	0.0761	1
regulation of threonine-tRNA ligase activity (GO:1905021)	1	1	0.04	+	24.76	0.0761	1
positive regulation of methionine-tRNA ligase activity (GO:1905020)	1	1	0.04	+	24.76	0.0761	1
regulation of methionine-tRNA ligase activity (GO:1905018)	1	1	0.04	+	24.76	0.0761	1
positive regulation of isoleucine-tRNA ligase activity (GO:1905017)	1	1	0.04	+	24.76	0.0761	1
regulation of isoleucine-tRNA ligase activity (GO:1905015)	1	1	0.04	+	24.76	0.0761	1
regulation of membrane repolarization during atrial cardiac muscle cell action potential (GO:1905000)	1	1	0.04	+	24.76	0.0761	1
riboflavin biosynthetic process (GO:0009231)	1	1	0.04	+	24.76	0.0761	1
pyrimidine deoxyribonucleoside triphosphate catabolic process (GO:0009213)	2	2	0.08	+	24.76	0.00857	0.403
purine ribonucleoside triphosphate catabolic process (GO:0009207)	1	1	0.04	+	24.76	0.0761	1
negative regulation of selenocysteine insertion sequence binding (GO:1904574)	1	1	0.04	+	24.76	0.0761	1
regulation of selenocysteine insertion sequence binding (GO:1904573)	1	1	0.04	+	24.76	0.0761	1
negative regulation of mRNA binding (GO:1904572)	1	1	0.04	+	24.76	0.0761	1
negative regulation of selenocysteine incorporation (GO:1904570)	1	1	0.04	+	24.76	0.0761	1
intercellular bridge organization (GO:0043063)	1	1	0.04	+	24.76	0.0761	1
pyrimidine nucleoside triphosphate catabolic process (GO:0009149)	2	2	0.08	+	24.76	0.00857	0.401
telomere maintenance via base-excision repair (GO:0097698)	1	1	0.04	+	24.76	0.0761	1
CMP-N-acetylneuraminate transmembrane transport (GO:0015782)	1	1	0.04	+	24.76	0.0761	1
regulation of plasma membrane raft polarization (GO:1903906)	1	1	0.04	+	24.76	0.0761	1
multiple spine synapse organization, single dendrite (GO:0150090)	1	1	0.04	+	24.76	0.0761	1
multiple spine synapse organization (GO:0150089)	1	1	0.04	+	24.76	0.0761	1
negative regulation of polynucleotide adenylyltransferase activity (GO:1904246)	1	1	0.04	+	24.76	0.0761	1
negative regulation of glycogen synthase activity, transferring glucose-1-phosphate (GO:1904227)	1	1	0.04	+	24.76	0.0761	1
regulation of glycogen synthase activity, transferring glucose-1-phosphate (GO:1904226)	1	1	0.04	+	24.76	0.0761	1
endocardial cushion cell development (GO:0061444)	1	1	0.04	+	24.76	0.0761	1
negative regulation of cell proliferation in bone marrow (GO:1903769)	1	1	0.04	+	24.76	0.0761	1
negative regulation of muscle filament sliding (GO:1904113)	1	1	0.04	+	24.76	0.0761	1
negative regulation of chaperone-mediated protein folding (GO:1903645)	2	2	0.08	+	24.76	0.00857	0.4
positive regulation of protein insertion into mitochondrial outer membrane (GO:1903638)	1	1	0.04	+	24.76	0.0761	1
regulation of protein insertion into mitochondrial outer membrane (GO:1903636)	1	1	0.04	+	24.76	0.0761	1
positive regulation of aminoacyl-tRNA ligase activity (GO:1903632)	2	2	0.08	+	24.76	0.00857	0.399
noradrenergic neuron fate commitment (GO:0003359)	1	1	0.04	+	24.76	0.0761	1
FMN metabolic process (GO:0046444)	1	1	0.04	+	24.76	0.0761	1
90S preribosome assembly (GO:0034463)	1	1	0.04	+	24.76	0.0761	1
positive regulation of central B cell tolerance induction (GO:0002897)	1	1	0.04	+	24.76	0.0761	1
regulation of central B cell tolerance induction (GO:0002895)	1	1	0.04	+	24.76	0.0761	1
negative regulation of chronic inflammatory response to non-antigenic stimulus (GO:0002881)	1	1	0.04	+	24.76	0.0761	1
DNA endoreduplication (GO:0042023)	1	1	0.04	+	24.76	0.0761	1
endothelial tip cell fate specification (GO:0097102)	1	1	0.04	+	24.76	0.0761	1
Okazaki fragment processing involved in mitotic DNA replication (GO:1903461)	1	1	0.04	+	24.76	0.0761	1
carotid body glomus cell differentiation (GO:0061103)	1	1	0.04	+	24.76	0.0761	1
stomach neuroendocrine cell differentiation (GO:0061102)	1	1	0.04	+	24.76	0.0761	1
lung neuroendocrine cell differentiation (GO:0061100)	1	1	0.04	+	24.76	0.0761	1
regulation of branching involved in salivary gland morphogenesis by epithelial-mesenchymal signaling (GO:0060683)	1	1	0.04	+	24.76	0.0761	1
mitotic DNA replication termination (GO:1902979)	1	1	0.04	+	24.76	0.0761	1
renal protein absorption (GO:0097017)	1	1	0.04	+	24.76	0.0761	1
cerebral cortex GABAergic interneuron fate commitment (GO:0021893)	2	2	0.08	+	24.76	0.00857	0.398
proteasome core complex assembly (GO:0080129)	1	1	0.04	+	24.76	0.0761	1
positive regulation of amacrine cell differentiation (GO:1902871)	2	2	0.08	+	24.76	0.00857	0.397
negative regulation of hippocampal neuron apoptotic process (GO:0110091)	3	2	0.12	+	16.51	0.0139	0.551
lysine metabolic process (GO:0006553)	3	2	0.12	+	16.51	0.0139	0.549
C-terminal protein methylation (GO:0006481)	3	2	0.12	+	16.51	0.0139	0.548
endosome fission (GO:0140285)	3	2	0.12	+	16.51	0.0139	0.546
rRNA 5'-end processing (GO:0000967)	3	2	0.12	+	16.51	0.0139	0.545
histone H4-R3 methylation (GO:0043985)	3	2	0.12	+	16.51	0.0139	0.544
proteasome regulatory particle assembly (GO:0070682)	3	2	0.12	+	16.51	0.0139	0.542
endonucleolytic cleavage to generate mature 5'-end of SSU-rRNA from (SSU-rRNA, 5.8S rRNA, LSU-rRNA) (GO:0000472)	3	2	0.12	+	16.51	0.0139	0.541
snRNA pseudouridine synthesis (GO:0031120)	3	2	0.12	+	16.51	0.0139	0.54
peptidyl-lysine modification to peptidyl-hypusine (GO:0008612)	3	2	0.12	+	16.51	0.0139	0.538
regulation of aminoacyl-tRNA ligase activity (GO:1903630)	3	2	0.12	+	16.51	0.0139	0.537
protein transport from ciliary membrane to plasma membrane (GO:1903445)	3	2	0.12	+	16.51	0.0139	0.536
commitment of multipotent stem cells to neuronal lineage in forebrain (GO:0021898)	3	2	0.12	+	16.51	0.0139	0.535
regulation of transcription from RNA polymerase II promoter involved in forebrain neuron fate commitment (GO:0021882)	3	2	0.12	+	16.51	0.0139	0.533
double-strand break repair via single-strand annealing (GO:0045002)	5	3	0.2	+	14.86	0.00282	0.192
viral translational termination-reinitiation (GO:0075525)	5	3	0.2	+	14.86	0.00282	0.191
RNA (guanine-N7)-methylation (GO:0036265)	5	3	0.2	+	14.86	0.00282	0.19
DNA double-strand break processing involved in repair via single-strand annealing (GO:0010792)	5	3	0.2	+	14.86	0.00282	0.189
positive regulation of B cell tolerance induction (GO:0002663)	2	1	0.08	+	12.38	0.112	1
regulation of B cell tolerance induction (GO:0002661)	2	1	0.08	+	12.38	0.112	1
negative regulation of germinal center formation (GO:0002635)	2	1	0.08	+	12.38	0.112	1
L-lysine catabolic process (GO:0019477)	2	1	0.08	+	12.38	0.112	1
U2-type prespliceosome assembly (GO:1903241)	2	1	0.08	+	12.38	0.112	1
vestibular nucleus development (GO:0021750)	2	1	0.08	+	12.38	0.112	1
D-gluconate catabolic process (GO:0046177)	2	1	0.08	+	12.38	0.112	1
aldonic acid catabolic process (GO:0046176)	2	1	0.08	+	12.38	0.112	1
positive regulation of transcription involved in G1/S transition of mitotic cell cycle (GO:0071931)	2	1	0.08	+	12.38	0.112	1
negative regulation of neutrophil differentiation (GO:0045659)	2	1	0.08	+	12.38	0.112	1
central tolerance induction (GO:0002508)	2	1	0.08	+	12.38	0.112	1
positive regulation of eosinophil differentiation (GO:0045645)	2	1	0.08	+	12.38	0.112	1
regulation of eosinophil differentiation (GO:0045643)	2	1	0.08	+	12.38	0.112	1
cerebellar Purkinje cell layer structural organization (GO:0021693)	2	1	0.08	+	12.38	0.112	1
cerebellar molecular layer morphogenesis (GO:0021687)	2	1	0.08	+	12.38	0.112	1
rhombomere 3 morphogenesis (GO:0021658)	2	1	0.08	+	12.38	0.112	1
chromosome passenger complex localization to kinetochore (GO:0072356)	2	1	0.08	+	12.38	0.112	1
negative regulation of NAD metabolic process (GO:1902689)	2	1	0.08	+	12.38	0.112	1
ITP metabolic process (GO:0046041)	2	1	0.08	+	12.38	0.112	1
NAD-cap decapping (GO:0110155)	2	1	0.08	+	12.38	0.112	1
positive regulation of adenylate cyclase-activating adrenergic receptor signaling pathway (GO:0071879)	2	1	0.08	+	12.38	0.112	1
eosinophil mediated immunity (GO:0002447)	2	1	0.08	+	12.38	0.112	1
DNA replication, Okazaki fragment processing (GO:0033567)	2	1	0.08	+	12.38	0.112	1
negative regulation of exo-alpha-sialidase activity (GO:1903016)	2	1	0.08	+	12.38	0.112	1
regulation of exo-alpha-sialidase activity (GO:1903015)	2	1	0.08	+	12.38	0.112	1
negative regulation of ferroptosis (GO:0110076)	2	1	0.08	+	12.38	0.112	1
regulation of ferroptosis (GO:0110075)	2	1	0.08	+	12.38	0.112	1
negative regulation of T cell activation via T cell receptor contact with antigen bound to MHC molecule on antigen presenting cell (GO:2001189)	2	1	0.08	+	12.38	0.112	1
negative regulation of complement activation, lectin pathway (GO:0001869)	2	1	0.08	+	12.38	0.112	1
regulation of complement activation, lectin pathway (GO:0001868)	2	1	0.08	+	12.38	0.112	1
negative regulation of motor neuron apoptotic process (GO:2000672)	6	3	0.24	+	12.38	0.00411	0.254
vestibular receptor cell morphogenesis (GO:0060116)	2	1	0.08	+	12.38	0.112	1
eosinophil activation involved in immune response (GO:0002278)	2	1	0.08	+	12.38	0.112	1
creatine biosynthetic process (GO:0006601)	2	1	0.08	+	12.38	0.112	1
creatine metabolic process (GO:0006600)	2	1	0.08	+	12.38	0.112	1
suppression by virus of host apoptotic process (GO:0019050)	2	1	0.08	+	12.38	0.112	1
negative regulation by host of viral glycoprotein metabolic process (GO:0044871)	2	1	0.08	+	12.38	0.112	1
modulation by host of viral glycoprotein metabolic process (GO:0044870)	2	1	0.08	+	12.38	0.112	1
negative regulation by host of viral exo-alpha-sialidase activity (GO:0044869)	2	1	0.08	+	12.38	0.112	1
modulation by host of viral catalytic activity (GO:0044867)	2	1	0.08	+	12.38	0.112	1
modulation by host of viral exo-alpha-sialidase activity (GO:0044866)	2	1	0.08	+	12.38	0.112	1
negative regulation of immunological synapse formation (GO:2000521)	2	1	0.08	+	12.38	0.112	1
metabolism by host of substance in symbiont (GO:0052419)	2	1	0.08	+	12.38	0.112	1
metabolism by host of symbiont macromolecule (GO:0052416)	2	1	0.08	+	12.38	0.112	1
negative regulation by host of symbiont catalytic activity (GO:0052403)	2	1	0.08	+	12.38	0.112	1
negative regulation of low-density lipoprotein particle receptor catabolic process (GO:0032804)	2	1	0.08	+	12.38	0.112	1
lysine catabolic process (GO:0006554)	2	1	0.08	+	12.38	0.112	1
tRNA wobble cytosine modification (GO:0002101)	2	1	0.08	+	12.38	0.112	1
catabolism by host of substance in symbiont (GO:0052364)	2	1	0.08	+	12.38	0.112	1
catabolism by organism of macromolecule in other organism involved in symbiotic interaction (GO:0052361)	2	1	0.08	+	12.38	0.112	1
catabolism by host of symbiont macromolecule (GO:0052360)	2	1	0.08	+	12.38	0.112	1
positive regulation of macrophage migration inhibitory factor signaling pathway (GO:2000448)	2	1	0.08	+	12.38	0.112	1
N-terminal protein amino acid methylation (GO:0006480)	2	1	0.08	+	12.38	0.112	1
positive regulation of Schwann cell differentiation (GO:0014040)	4	2	0.16	+	12.38	0.0203	0.663
regulation of Schwann cell differentiation (GO:0014038)	4	2	0.16	+	12.38	0.0203	0.662
histidyl-tRNA aminoacylation (GO:0006427)	2	1	0.08	+	12.38	0.112	1
general adaptation syndrome (GO:0051866)	2	1	0.08	+	12.38	0.112	1
cell-cell signaling involved in cell fate commitment (GO:0045168)	2	1	0.08	+	12.38	0.112	1
metabolism of macromolecule in other organism involved in symbiotic interaction (GO:0052229)	2	1	0.08	+	12.38	0.112	1
catabolism of substance in other organism involved in symbiotic interaction (GO:0052227)	2	1	0.08	+	12.38	0.112	1
metabolism of substance in other organism involved in symbiotic interaction (GO:0052214)	2	1	0.08	+	12.38	0.112	1
negative regulation of catalytic activity in other organism involved in symbiotic interaction (GO:0052199)	2	1	0.08	+	12.38	0.112	1
positive regulation of anoikis (GO:2000210)	6	3	0.24	+	12.38	0.00411	0.253
leading strand elongation (GO:0006272)	4	2	0.16	+	12.38	0.0203	0.661
dUMP biosynthetic process (GO:0006226)	2	1	0.08	+	12.38	0.112	1
negative regulation of vascular associated smooth muscle cell differentiation involved in phenotypic switching (GO:1905931)	2	1	0.08	+	12.38	0.112	1
negative regulation of cell differentiation involved in phenotypic switching (GO:1905916)	2	1	0.08	+	12.38	0.112	1
stem cell fate determination (GO:0048867)	2	1	0.08	+	12.38	0.112	1
mRNA export from nucleus in response to heat stress (GO:0031990)	2	1	0.08	+	12.38	0.112	1
embryonic lung development (GO:1990401)	2	1	0.08	+	12.38	0.112	1
positive regulation of type B pancreatic cell development (GO:2000078)	2	1	0.08	+	12.38	0.112	1
negative regulation of glycine import across plasma membrane (GO:1900924)	2	1	0.08	+	12.38	0.112	1
regulation of intraciliary retrograde transport (GO:1905799)	2	1	0.08	+	12.38	0.112	1
nuclear retention of pre-mRNA with aberrant 3'-ends at the site of transcription (GO:0071049)	2	1	0.08	+	12.38	0.112	1
nuclear mRNA surveillance of mRNA 3'-end processing (GO:0071031)	2	1	0.08	+	12.38	0.112	1
protein localization to perinuclear region of cytoplasm (GO:1905719)	2	1	0.08	+	12.38	0.112	1
vitamin D receptor signaling pathway (GO:0070561)	2	1	0.08	+	12.38	0.112	1
metaphase (GO:0051323)	2	1	0.08	+	12.38	0.112	1
positive regulation of receptor-mediated endocytosis involved in cholesterol transport (GO:1905602)	2	1	0.08	+	12.38	0.112	1
rRNA (guanine-N7)-methylation (GO:0070476)	2	1	0.08	+	12.38	0.112	1
regulation of low-density lipoprotein particle receptor binding (GO:1905595)	2	1	0.08	+	12.38	0.112	1
positive regulation of low-density lipoprotein particle clearance (GO:1905581)	2	1	0.08	+	12.38	0.112	1
maintenance of translational fidelity (GO:1990145)	2	1	0.08	+	12.38	0.112	1
intrinsic apoptotic signaling pathway in response to hypoxia (GO:1990144)	2	1	0.08	+	12.38	0.112	1
multi-organism catabolic process (GO:0044035)	2	1	0.08	+	12.38	0.112	1
box H/ACA snoRNA 3'-end processing (GO:0000495)	2	1	0.08	+	12.38	0.112	1
snoRNA guided rRNA pseudouridine synthesis (GO:0000454)	4	2	0.16	+	12.38	0.0203	0.659
foramen ovale closure (GO:0035922)	2	1	0.08	+	12.38	0.112	1
TCR signalosome assembly (GO:0036399)	2	1	0.08	+	12.38	0.112	1
Fas signaling pathway (GO:0036337)	2	1	0.08	+	12.38	0.112	1
vesicle tethering to endoplasmic reticulum (GO:0099044)	2	1	0.08	+	12.38	0.112	1
generation of catalytic spliceosome for second transesterification step (GO:0000350)	2	1	0.08	+	12.38	0.112	1
nucleologenesis (GO:0017126)	2	1	0.08	+	12.38	0.112	1
positive regulation of protein localization to Cajal body (GO:1904871)	2	1	0.08	+	12.38	0.112	1
regulation of protein localization to Cajal body (GO:1904869)	2	1	0.08	+	12.38	0.112	1
Golgi vesicle fusion to target membrane (GO:0048210)	4	2	0.16	+	12.38	0.0203	0.658
negative regulation of CD8-positive, alpha-beta T cell differentiation (GO:0043377)	2	1	0.08	+	12.38	0.112	1
eosinophil degranulation (GO:0043308)	2	1	0.08	+	12.38	0.112	1
eosinophil activation (GO:0043307)	2	1	0.08	+	12.38	0.112	1
cysteine transport (GO:0042883)	2	1	0.08	+	12.38	0.112	1
positive regulation of telomeric DNA binding (GO:1904744)	2	1	0.08	+	12.38	0.112	1
negative regulation of cardiac muscle tissue regeneration (GO:1905179)	2	1	0.08	+	12.38	0.112	1
regulation of cardiac muscle tissue regeneration (GO:1905178)	2	1	0.08	+	12.38	0.112	1
regulation of cytoplasmic translational initiation (GO:1904688)	4	2	0.16	+	12.38	0.0203	0.657
positive regulation of somatic stem cell population maintenance (GO:1904674)	2	1	0.08	+	12.38	0.112	1
flavin-containing compound biosynthetic process (GO:0042727)	2	1	0.08	+	12.38	0.112	1
negative regulation of phenotypic switching (GO:1900240)	2	1	0.08	+	12.38	0.112	1
positive regulation of cardiolipin metabolic process (GO:1900210)	2	1	0.08	+	12.38	0.112	1
mitotic metaphase (GO:0000089)	2	1	0.08	+	12.38	0.112	1
mitotic M phase (GO:0000087)	2	1	0.08	+	12.38	0.112	1
argininosuccinate metabolic process (GO:0000053)	2	1	0.08	+	12.38	0.112	1
L-proline biosynthetic process (GO:0055129)	4	2	0.16	+	12.38	0.0203	0.655
pantothenate metabolic process (GO:0015939)	2	1	0.08	+	12.38	0.112	1
pyrimidine deoxyribonucleotide catabolic process (GO:0009223)	4	2	0.16	+	12.38	0.0203	0.654
ribonucleoside triphosphate catabolic process (GO:0009203)	2	1	0.08	+	12.38	0.112	1
regulation of selenocysteine incorporation (GO:1904569)	2	1	0.08	+	12.38	0.112	1
endosome membrane tubulation (GO:0097750)	2	1	0.08	+	12.38	0.112	1
negative regulation of Schwann cell migration (GO:1900148)	2	1	0.08	+	12.38	0.112	1
multivesicular body-lysosome fusion (GO:0061763)	2	1	0.08	+	12.38	0.112	1
carnosine metabolic process (GO:0035498)	2	1	0.08	+	12.38	0.112	1
box H/ACA snoRNA processing (GO:0034964)	2	1	0.08	+	12.38	0.112	1
positive regulation of protein processing in phagocytic vesicle (GO:1903923)	2	1	0.08	+	12.38	0.112	1
regulation of protein processing in phagocytic vesicle (GO:1903921)	2	1	0.08	+	12.38	0.112	1
lysine biosynthetic process (GO:0009085)	2	1	0.08	+	12.38	0.112	1
cellular stress response to acid chemical (GO:0097533)	2	1	0.08	+	12.38	0.112	1
stress response to acid chemical (GO:0097532)	2	1	0.08	+	12.38	0.112	1
regulation of polynucleotide adenylyltransferase activity (GO:1904245)	2	1	0.08	+	12.38	0.112	1
endocardial cushion cell differentiation (GO:0061443)	2	1	0.08	+	12.38	0.112	1
DNA protection (GO:0042262)	2	1	0.08	+	12.38	0.112	1
RNA repair (GO:0042245)	2	1	0.08	+	12.38	0.112	1
lysine biosynthetic process via aminoadipic acid (GO:0019878)	2	1	0.08	+	12.38	0.112	1
nuclear speck organization (GO:0035063)	4	2	0.16	+	12.38	0.0203	0.653
establishment of glial blood-brain barrier (GO:0060857)	2	1	0.08	+	12.38	0.112	1
Notch signaling pathway involved in arterial endothelial cell fate commitment (GO:0060853)	2	1	0.08	+	12.38	0.112	1
blood vessel endothelial cell fate commitment (GO:0060846)	2	1	0.08	+	12.38	0.112	1
arterial endothelial cell fate commitment (GO:0060844)	2	1	0.08	+	12.38	0.112	1
mitochondrial respiratory chain complex II assembly (GO:0034553)	4	2	0.16	+	12.38	0.0203	0.651
respiratory chain complex II assembly (GO:0034552)	4	2	0.16	+	12.38	0.0203	0.65
uroporphyrinogen III metabolic process (GO:0046502)	2	1	0.08	+	12.38	0.112	1
oligodendrocyte apoptotic process (GO:0097252)	2	1	0.08	+	12.38	0.112	1
negative regulation of glucose catabolic process to lactate via pyruvate (GO:1904024)	2	1	0.08	+	12.38	0.112	1
negative regulation of G protein-coupled receptor internalization (GO:1904021)	2	1	0.08	+	12.38	0.112	1
cellular response to monosodium glutamate (GO:1904009)	2	1	0.08	+	12.38	0.112	1
response to monosodium glutamate (GO:1904008)	2	1	0.08	+	12.38	0.112	1
tRNA N1-guanine methylation (GO:0002939)	2	1	0.08	+	12.38	0.112	1
negative regulation of phosphatidylinositol biosynthetic process (GO:0010512)	2	1	0.08	+	12.38	0.112	1
positive regulation of single strand break repair (GO:1903518)	2	1	0.08	+	12.38	0.112	1
regulation of single strand break repair (GO:1903516)	2	1	0.08	+	12.38	0.112	1
dihydrofolate metabolic process (GO:0046452)	2	1	0.08	+	12.38	0.112	1
L-lysine metabolic process (GO:0046440)	2	1	0.08	+	12.38	0.112	1
response to injury involved in regulation of muscle adaptation (GO:0014876)	2	1	0.08	+	12.38	0.112	1
fasciculation of motor neuron axon (GO:0097156)	2	1	0.08	+	12.38	0.112	1
regulation of chronic inflammatory response to non-antigenic stimulus (GO:0002880)	2	1	0.08	+	12.38	0.112	1
recruitment of 3'-end processing factors to RNA polymerase II holoenzyme complex (GO:0034402)	2	1	0.08	+	12.38	0.112	1
blood vessel endothelial cell fate specification (GO:0097101)	2	1	0.08	+	12.38	0.112	1
box H/ACA snoRNA metabolic process (GO:0033979)	2	1	0.08	+	12.38	0.112	1
lung smooth muscle development (GO:0061145)	2	1	0.08	+	12.38	0.112	1
adrenal chromaffin cell differentiation (GO:0061104)	2	1	0.08	+	12.38	0.112	1
CMP-N-acetylneuraminate metabolic process (GO:0046381)	2	1	0.08	+	12.38	0.112	1
lateral inhibition (GO:0046331)	2	1	0.08	+	12.38	0.112	1
negative regulation of muscle atrophy (GO:0014736)	2	1	0.08	+	12.38	0.112	1
eukaryotic translation initiation factor 4F complex assembly (GO:0097010)	2	1	0.08	+	12.38	0.112	1
regulation of nucleus organization (GO:1903353)	2	1	0.08	+	12.38	0.112	1
D-gluconate metabolic process (GO:0019521)	2	1	0.08	+	12.38	0.112	1
aldonic acid metabolic process (GO:0019520)	2	1	0.08	+	12.38	0.112	1
pulmonary valve formation (GO:0003193)	2	1	0.08	+	12.38	0.112	1
pulmonary vein morphogenesis (GO:0060577)	2	1	0.08	+	12.38	0.112	1
regulation of amacrine cell differentiation (GO:1902869)	4	2	0.16	+	12.38	0.0203	0.649
bronchus cartilage development (GO:0060532)	2	1	0.08	+	12.38	0.112	1
spermidine catabolic process (GO:0046203)	2	1	0.08	+	12.38	0.112	1
box C/D snoRNP assembly (GO:0000492)	9	4	0.36	+	11.01	0.00122	0.104
maturation of LSU-rRNA (GO:0000470)	30	13	1.21	+	10.73	5.17e-09	1.27e-06
tetrahydrobiopterin metabolic process (GO:0046146)	7	3	0.28	+	10.61	0.0057	0.306
tetrahydrobiopterin biosynthetic process (GO:0006729)	7	3	0.28	+	10.61	0.0057	0.305
snRNA modification (GO:0040031)	7	3	0.28	+	10.61	0.0057	0.304
positive regulation of ryanodine-sensitive calcium-release channel activity (GO:0060316)	5	2	0.2	+	9.9	0.0278	0.77
regulation of hippocampal neuron apoptotic process (GO:0110089)	5	2	0.2	+	9.9	0.0278	0.769
negative regulation by host of symbiont molecular function (GO:0052405)	5	2	0.2	+	9.9	0.0278	0.767
proline biosynthetic process (GO:0006561)	5	2	0.2	+	9.9	0.0278	0.766
negative regulation of molecular function in other organism involved in symbiotic interaction (GO:0052204)	5	2	0.2	+	9.9	0.0278	0.765
negative regulation of dendrite development (GO:2000171)	10	4	0.4	+	9.9	0.00165	0.13
mRNA pseudouridine synthesis (GO:1990481)	5	2	0.2	+	9.9	0.0278	0.763
negative regulation of molecular function in other organism (GO:0044362)	5	2	0.2	+	9.9	0.0278	0.762
ciliary basal body organization (GO:0032053)	5	2	0.2	+	9.9	0.0278	0.761
establishment of protein localization to telomere (GO:0070200)	5	2	0.2	+	9.9	0.0278	0.759
positive regulation of DNA-directed DNA polymerase activity (GO:1900264)	10	4	0.4	+	9.9	0.00165	0.129
regulation of DNA-directed DNA polymerase activity (GO:1900262)	10	4	0.4	+	9.9	0.00165	0.128
oxidative RNA demethylation (GO:0035513)	5	2	0.2	+	9.9	0.0278	0.758
pyrimidine deoxyribonucleoside triphosphate metabolic process (GO:0009211)	5	2	0.2	+	9.9	0.0278	0.757
establishment of Sertoli cell barrier (GO:0097368)	5	2	0.2	+	9.9	0.0278	0.755
regulation of chaperone-mediated protein folding (GO:1903644)	5	2	0.2	+	9.9	0.0278	0.754
negative regulation of protein folding (GO:1903333)	5	2	0.2	+	9.9	0.0278	0.753
ribosomal large subunit biogenesis (GO:0042273)	73	28	2.95	+	9.5	9.54e-17	3.67e-14
regulation of motor neuron apoptotic process (GO:2000671)	8	3	0.32	+	9.29	0.00761	0.379
nucleolus organization (GO:0007000)	8	3	0.32	+	9.29	0.00761	0.378
pre-replicative complex assembly involved in cell cycle DNA replication (GO:1902299)	8	3	0.32	+	9.29	0.00761	0.377
cellular response to UV-B (GO:0071493)	8	3	0.32	+	9.29	0.00761	0.376
pre-replicative complex assembly involved in nuclear cell cycle DNA replication (GO:0006267)	8	3	0.32	+	9.29	0.00761	0.374
maturation of LSU-rRNA from tricistronic rRNA transcript (SSU-rRNA, 5.8S rRNA, LSU-rRNA) (GO:0000463)	16	6	0.65	+	9.29	0.000147	0.0183
endonucleolytic cleavage in ITS1 to separate SSU-rRNA from 5.8S rRNA and LSU-rRNA from tricistronic rRNA transcript (SSU-rRNA, 5.8S rRNA, LSU-rRNA) (GO:0000447)	8	3	0.32	+	9.29	0.00761	0.373
pre-replicative complex assembly (GO:0036388)	8	3	0.32	+	9.29	0.00761	0.372
vesicle fusion with Golgi apparatus (GO:0048280)	8	3	0.32	+	9.29	0.00761	0.371
U4 snRNA 3'-end processing (GO:0034475)	8	3	0.32	+	9.29	0.00761	0.37
small nucleolar ribonucleoprotein complex assembly (GO:0000491)	11	4	0.44	+	9	0.00218	0.157
DNA strand elongation involved in DNA replication (GO:0006271)	14	5	0.57	+	8.84	0.000643	0.0619
proteasome assembly (GO:0043248)	14	5	0.57	+	8.84	0.000643	0.0615
ribosomal large subunit assembly (GO:0000027)	29	10	1.17	+	8.54	1.69e-06	0.000328
exonucleolytic catabolism of deadenylated mRNA (GO:0043928)	9	3	0.36	+	8.25	0.00986	0.436
ncRNA 5'-end processing (GO:0034471)	18	6	0.73	+	8.25	0.000248	0.0282
positive regulation of intestinal cholesterol absorption (GO:0045797)	3	1	0.12	+	8.25	0.146	1
purine deoxyribonucleoside metabolic process (GO:0046122)	3	1	0.12	+	8.25	0.146	1
hypoxanthine biosynthetic process (GO:0046101)	3	1	0.12	+	8.25	0.146	1
mitotic sister chromatid cohesion, centromeric (GO:0071962)	3	1	0.12	+	8.25	0.146	1
substrate-dependent cell migration, cell attachment to substrate (GO:0006931)	3	1	0.12	+	8.25	0.146	1
cytokine production involved in inflammatory response (GO:0002534)	3	1	0.12	+	8.25	0.146	1
negative regulation by symbiont of host apoptotic process (GO:0033668)	3	1	0.12	+	8.25	0.146	1
cerebellar cortex structural organization (GO:0021698)	3	1	0.12	+	8.25	0.146	1
cerebellar molecular layer development (GO:0021679)	3	1	0.12	+	8.25	0.146	1
adenine biosynthetic process (GO:0046084)	3	1	0.12	+	8.25	0.146	1
adenine metabolic process (GO:0046083)	3	1	0.12	+	8.25	0.146	1
regulation of NAD metabolic process (GO:1902688)	3	1	0.12	+	8.25	0.146	1
dUMP metabolic process (GO:0046078)	3	1	0.12	+	8.25	0.146	1
interferon-gamma-mediated signaling pathway (GO:0060333)	6	2	0.24	+	8.25	0.0361	0.87
UMP metabolic process (GO:0046049)	3	1	0.12	+	8.25	0.146	1
negative regulation of ryanodine-sensitive calcium-release channel activity (GO:0060315)	6	2	0.24	+	8.25	0.0361	0.869
negative regulation of estrogen receptor binding (GO:0071899)	3	1	0.12	+	8.25	0.146	1
regulation of estrogen receptor binding (GO:0071898)	3	1	0.12	+	8.25	0.146	1
assembly of large subunit precursor of preribosome (GO:1902626)	3	1	0.12	+	8.25	0.146	1
response to mycotoxin (GO:0010046)	3	1	0.12	+	8.25	0.146	1
negative regulation of cysteine-type endopeptidase activity involved in execution phase of apoptosis (GO:2001271)	3	1	0.12	+	8.25	0.146	1
rhombomere morphogenesis (GO:0021593)	3	1	0.12	+	8.25	0.146	1
medulla oblongata development (GO:0021550)	3	1	0.12	+	8.25	0.146	1
epithalamus development (GO:0021538)	3	1	0.12	+	8.25	0.146	1
spinal cord oligodendrocyte cell fate specification (GO:0021530)	3	1	0.12	+	8.25	0.146	1
intestinal D-glucose absorption (GO:0001951)	3	1	0.12	+	8.25	0.146	1
visceral motor neuron differentiation (GO:0021524)	3	1	0.12	+	8.25	0.146	1
floor plate formation (GO:0021508)	3	1	0.12	+	8.25	0.146	1
regulation of T cell activation via T cell receptor contact with antigen bound to MHC molecule on antigen presenting cell (GO:2001188)	3	1	0.12	+	8.25	0.146	1
transforming growth factor beta receptor complex assembly (GO:0007181)	3	1	0.12	+	8.25	0.146	1
positive regulation of adenosine receptor signaling pathway (GO:0060168)	3	1	0.12	+	8.25	0.146	1
olfactory pit development (GO:0060166)	3	1	0.12	+	8.25	0.146	1
negative regulation of receptor catabolic process (GO:2000645)	3	1	0.12	+	8.25	0.146	1
positive regulation of apoptotic process by virus (GO:0060139)	3	1	0.12	+	8.25	0.146	1
protein localization to cell leading edge (GO:1902463)	3	1	0.12	+	8.25	0.146	1
vestibular receptor cell development (GO:0060118)	3	1	0.12	+	8.25	0.146	1
vestibular receptor cell differentiation (GO:0060114)	3	1	0.12	+	8.25	0.146	1
positive regulation of metanephric mesenchymal cell migration (GO:2000591)	3	1	0.12	+	8.25	0.146	1
modulation by host of viral molecular function (GO:0044868)	3	1	0.12	+	8.25	0.146	1
modulation by host of symbiont catalytic activity (GO:0052422)	3	1	0.12	+	8.25	0.146	1
spermine biosynthetic process (GO:0006597)	3	1	0.12	+	8.25	0.146	1
genetic imprinting at mating-type locus (GO:0071515)	3	1	0.12	+	8.25	0.146	1
sequestering of BMP from receptor via BMP binding (GO:0038098)	3	1	0.12	+	8.25	0.146	1
regulation of macrophage migration inhibitory factor signaling pathway (GO:2000446)	3	1	0.12	+	8.25	0.146	1
cellular response to laminar fluid shear stress (GO:0071499)	6	2	0.24	+	8.25	0.0361	0.868
positive regulation of serotonin secretion (GO:0014064)	3	1	0.12	+	8.25	0.146	1
phenylalanyl-tRNA aminoacylation (GO:0006432)	3	1	0.12	+	8.25	0.146	1
arginyl-tRNA aminoacylation (GO:0006420)	3	1	0.12	+	8.25	0.146	1
negative regulation of peptidyl-serine phosphorylation of STAT protein (GO:0033140)	3	1	0.12	+	8.25	0.146	1
regulation of cell growth by extracellular stimulus (GO:0001560)	3	1	0.12	+	8.25	0.146	1
ovarian cumulus expansion (GO:0001550)	3	1	0.12	+	8.25	0.146	1
regulation of oxygen metabolic process (GO:2000374)	3	1	0.12	+	8.25	0.146	1
positive regulation of DNA topoisomerase (ATP-hydrolyzing) activity (GO:2000373)	3	1	0.12	+	8.25	0.146	1
regulation of DNA topoisomerase (ATP-hydrolyzing) activity (GO:2000371)	3	1	0.12	+	8.25	0.146	1
positive regulation of keratinocyte apoptotic process (GO:1902174)	3	1	0.12	+	8.25	0.146	1
regulation of kainate selective glutamate receptor activity (GO:2000312)	3	1	0.12	+	8.25	0.146	1
modulation of catalytic activity in other organism involved in symbiotic interaction (GO:0052203)	3	1	0.12	+	8.25	0.146	1
peptidyl-serine ADP-ribosylation (GO:0018312)	3	1	0.12	+	8.25	0.146	1
peptidyl-glutamate ADP-deribosylation (GO:0140291)	3	1	0.12	+	8.25	0.146	1
mitochondrial mRNA catabolic process (GO:0000958)	3	1	0.12	+	8.25	0.146	1
mitochondrial RNA catabolic process (GO:0000957)	3	1	0.12	+	8.25	0.146	1
pyrimidine nucleotide catabolic process (GO:0006244)	6	2	0.24	+	8.25	0.0361	0.867
UMP biosynthetic process (GO:0006222)	3	1	0.12	+	8.25	0.146	1
regulation of vascular associated smooth muscle cell differentiation involved in phenotypic switching (GO:1905930)	3	1	0.12	+	8.25	0.146	1
regulation of cell differentiation involved in phenotypic switching (GO:1905915)	3	1	0.12	+	8.25	0.146	1
negative regulation of locomotion involved in locomotory behavior (GO:0090327)	3	1	0.12	+	8.25	0.146	1
maintenance of postsynaptic density structure (GO:0099562)	3	1	0.12	+	8.25	0.146	1
negative regulation by symbiont of host programmed cell death (GO:0052041)	3	1	0.12	+	8.25	0.146	1
regulation of tetrapyrrole biosynthetic process (GO:1901463)	3	1	0.12	+	8.25	0.146	1
transepithelial ammonium transport (GO:0070634)	3	1	0.12	+	8.25	0.146	1
regulation of glycine import across plasma membrane (GO:1900923)	3	1	0.12	+	8.25	0.146	1
hexitol metabolic process (GO:0006059)	3	1	0.12	+	8.25	0.146	1
DNA strand renaturation (GO:0000733)	3	1	0.12	+	8.25	0.146	1
double-strand break repair via break-induced replication (GO:0000727)	12	4	0.48	+	8.25	0.00282	0.189
nuclear polyadenylation-dependent ncRNA catabolic process (GO:0071046)	6	2	0.24	+	8.25	0.0361	0.865
nuclear polyadenylation-dependent tRNA catabolic process (GO:0071038)	6	2	0.24	+	8.25	0.0361	0.864
nuclear polyadenylation-dependent rRNA catabolic process (GO:0071035)	6	2	0.24	+	8.25	0.0361	0.863
nuclear ncRNA surveillance (GO:0071029)	6	2	0.24	+	8.25	0.0361	0.861
detoxification of nitrogen compound (GO:0051410)	3	1	0.12	+	8.25	0.146	1
regulation of odontoblast differentiation (GO:1901329)	3	1	0.12	+	8.25	0.146	1
intestinal hexose absorption (GO:0106001)	3	1	0.12	+	8.25	0.146	1
tubulin deacetylation (GO:0090042)	3	1	0.12	+	8.25	0.146	1
musculoskeletal movement, spinal reflex action (GO:0050883)	3	1	0.12	+	8.25	0.146	1
cellular detoxification of nitrogen compound (GO:0070458)	3	1	0.12	+	8.25	0.146	1
regulation of heme biosynthetic process (GO:0070453)	3	1	0.12	+	8.25	0.146	1
cell dedifferentiation (GO:0043697)	6	2	0.24	+	8.25	0.0361	0.86
dedifferentiation (GO:0043696)	6	2	0.24	+	8.25	0.0361	0.859
mitochondrial tRNA 3'-end processing (GO:1990180)	3	1	0.12	+	8.25	0.146	1
protein linear deubiquitination (GO:1990108)	3	1	0.12	+	8.25	0.146	1
tRNA-guanine transglycosylation (GO:0101030)	3	1	0.12	+	8.25	0.146	1
positive regulation of focal adhesion disassembly (GO:0120183)	6	2	0.24	+	8.25	0.0361	0.857
regulation of focal adhesion disassembly (GO:0120182)	6	2	0.24	+	8.25	0.0361	0.856
DNA hypermethylation (GO:0044026)	6	2	0.24	+	8.25	0.0361	0.855
box C/D snoRNA 3'-end processing (GO:0000494)	3	1	0.12	+	8.25	0.146	1
endonucleolytic cleavage in 5'-ETS of tricistronic rRNA transcript (SSU-rRNA, 5.8S rRNA, LSU-rRNA) (GO:0000480)	6	2	0.24	+	8.25	0.0361	0.854
wybutosine biosynthetic process (GO:0031591)	3	1	0.12	+	8.25	0.146	1
wybutosine metabolic process (GO:0031590)	3	1	0.12	+	8.25	0.146	1
response to symbiotic bacterium (GO:0009609)	3	1	0.12	+	8.25	0.146	1
response to symbiont (GO:0009608)	3	1	0.12	+	8.25	0.146	1
negative regulation of fermentation (GO:1901003)	3	1	0.12	+	8.25	0.146	1
ceramide translocation (GO:0099040)	3	1	0.12	+	8.25	0.146	1
regulation of mating type switching (GO:0031494)	3	1	0.12	+	8.25	0.146	1
positive regulation of mesenchymal stem cell migration (GO:1905322)	3	1	0.12	+	8.25	0.146	1
regulation of mesenchymal stem cell migration (GO:1905320)	3	1	0.12	+	8.25	0.146	1
negative regulation of DNA recombination at telomere (GO:0048239)	3	1	0.12	+	8.25	0.146	1
positive regulation of interleukin-6-mediated signaling pathway (GO:0070105)	3	1	0.12	+	8.25	0.146	1
positive regulation of glutamate receptor signaling pathway (GO:1900451)	3	1	0.12	+	8.25	0.146	1
positive regulation of metanephric mesenchymal cell migration by platelet-derived growth factor receptor-beta signaling pathway (GO:0035793)	3	1	0.12	+	8.25	0.146	1
fused antrum stage (GO:0048165)	3	1	0.12	+	8.25	0.146	1
positive regulation of protein localization to nucleolus (GO:1904751)	6	2	0.24	+	8.25	0.0361	0.852
positive regulation of intestinal lipid absorption (GO:1904731)	3	1	0.12	+	8.25	0.146	1
regulation of granulosa cell apoptotic process (GO:1904708)	3	1	0.12	+	8.25	0.146	1
establishment of left/right asymmetry (GO:0061966)	3	1	0.12	+	8.25	0.146	1
positive regulation of cytoplasmic translational initiation (GO:1904690)	3	1	0.12	+	8.25	0.146	1
tRNA 3'-trailer cleavage (GO:0042779)	3	1	0.12	+	8.25	0.146	1
nucleosome mobilization (GO:0042766)	3	1	0.12	+	8.25	0.146	1
flavin-containing compound metabolic process (GO:0042726)	3	1	0.12	+	8.25	0.146	1
regulation of phenotypic switching (GO:1900239)	3	1	0.12	+	8.25	0.146	1
regulation of metanephric mesenchymal cell migration by platelet-derived growth factor receptor-beta signaling pathway (GO:1900238)	3	1	0.12	+	8.25	0.146	1
regulation of epithelium regeneration (GO:1905041)	3	1	0.12	+	8.25	0.146	1
regulation of membrane repolarization during cardiac muscle cell action potential (GO:1905031)	3	1	0.12	+	8.25	0.146	1
replication fork arrest (GO:0043111)	3	1	0.12	+	8.25	0.146	1
sister chromatid biorientation (GO:0031134)	3	1	0.12	+	8.25	0.146	1
snoRNA 3'-end processing (GO:0031126)	12	4	0.48	+	8.25	0.00282	0.188
dendrite regeneration (GO:0031104)	3	1	0.12	+	8.25	0.146	1
positive regulation of intracellular mRNA localization (GO:1904582)	3	1	0.12	+	8.25	0.146	1
mitochondrial tRNA 5'-end processing (GO:0097745)	3	1	0.12	+	8.25	0.146	1
pyrimidine ribonucleoside monophosphate biosynthetic process (GO:0009174)	3	1	0.12	+	8.25	0.146	1
pyrimidine ribonucleoside monophosphate metabolic process (GO:0009173)	3	1	0.12	+	8.25	0.146	1
positive regulation of intestinal absorption (GO:1904480)	3	1	0.12	+	8.25	0.146	1
box C/D snoRNA processing (GO:0034963)	3	1	0.12	+	8.25	0.146	1
DNA ADP-ribosylation (GO:0030592)	3	1	0.12	+	8.25	0.146	1
regulation of SMAD protein complex assembly (GO:0010990)	6	2	0.24	+	8.25	0.0361	0.851
glycolytic process from galactose (GO:0061623)	3	1	0.12	+	8.25	0.146	1
stomach development (GO:0062094)	3	1	0.12	+	8.25	0.146	1
brain segmentation (GO:0035284)	3	1	0.12	+	8.25	0.146	1
central nervous system segmentation (GO:0035283)	3	1	0.12	+	8.25	0.146	1
negative regulation of cellular response to transforming growth factor beta stimulus (GO:1903845)	3	1	0.12	+	8.25	0.146	1
tetrahydrofolate biosynthetic process (GO:0046654)	6	2	0.24	+	8.25	0.0361	0.85
negative regulation of adipose tissue development (GO:1904178)	3	1	0.12	+	8.25	0.146	1
cell communication by chemical coupling (GO:0010643)	3	1	0.12	+	8.25	0.146	1
positive regulation of cap-independent translational initiation (GO:1903679)	3	1	0.12	+	8.25	0.146	1
regulation of cap-independent translational initiation (GO:1903677)	3	1	0.12	+	8.25	0.146	1
endothelial cell fate specification (GO:0060847)	3	1	0.12	+	8.25	0.146	1
regulation of glucose catabolic process to lactate via pyruvate (GO:1904023)	3	1	0.12	+	8.25	0.146	1
regulation of meiotic cell cycle process involved in oocyte maturation (GO:1903538)	3	1	0.12	+	8.25	0.146	1
noradrenergic neuron development (GO:0003358)	3	1	0.12	+	8.25	0.146	1
cellular response to actinomycin D (GO:0072717)	3	1	0.12	+	8.25	0.146	1
U5 snRNA 3'-end processing (GO:0034476)	3	1	0.12	+	8.25	0.146	1
U1 snRNA 3'-end processing (GO:0034473)	3	1	0.12	+	8.25	0.146	1
small-subunit processome assembly (GO:0034462)	3	1	0.12	+	8.25	0.146	1
very-low-density lipoprotein particle clearance (GO:0034447)	3	1	0.12	+	8.25	0.146	1
fasciculation of sensory neuron axon (GO:0097155)	3	1	0.12	+	8.25	0.146	1
urate biosynthetic process (GO:0034418)	3	1	0.12	+	8.25	0.146	1
DNA methylation on cytosine within a CG sequence (GO:0010424)	3	1	0.12	+	8.25	0.146	1
box C/D snoRNA metabolic process (GO:0033967)	3	1	0.12	+	8.25	0.146	1
habenula development (GO:0021986)	3	1	0.12	+	8.25	0.146	1
regulation of DNA recombination at telomere (GO:0072695)	3	1	0.12	+	8.25	0.146	1
regulation of transcription from RNA polymerase II promoter involved in spinal cord motor neuron fate specification (GO:0021912)	3	1	0.12	+	8.25	0.146	1
mitotic telomere maintenance via semi-conservative replication (GO:1902990)	3	1	0.12	+	8.25	0.146	1
mitotic DNA replication (GO:1902969)	12	4	0.48	+	8.25	0.00282	0.187
regulation of vacuolar transport (GO:1903335)	3	1	0.12	+	8.25	0.146	1
terminal web assembly (GO:1902896)	3	1	0.12	+	8.25	0.146	1
negative regulation of release of cytochrome c from mitochondria (GO:0090201)	19	6	0.77	+	7.82	0.000316	0.0344
maturation of 5.8S rRNA (GO:0000460)	35	11	1.41	+	7.78	1.09e-06	0.000217
ruffle assembly (GO:0097178)	16	5	0.65	+	7.74	0.00106	0.0936
nuclear mRNA surveillance (GO:0071028)	13	4	0.53	+	7.62	0.00358	0.229
nuclear RNA surveillance (GO:0071027)	13	4	0.53	+	7.62	0.00358	0.228
regulation of hematopoietic stem cell proliferation (GO:1902033)	10	3	0.4	+	7.43	0.0125	0.516
RNA 5'-end processing (GO:0000966)	20	6	0.81	+	7.43	0.000397	0.0413
negative regulation of ubiquitin protein ligase activity (GO:1904667)	10	3	0.4	+	7.43	0.0125	0.515
rRNA 3'-end processing (GO:0031125)	10	3	0.4	+	7.43	0.0125	0.513
rRNA pseudouridine synthesis (GO:0031118)	10	3	0.4	+	7.43	0.0125	0.512
cleavage involved in rRNA processing (GO:0000469)	27	8	1.09	+	7.34	4.62e-05	0.00652
histone H2A acetylation (GO:0043968)	17	5	0.69	+	7.28	0.00132	0.112
cell cycle DNA replication (GO:0044786)	24	7	0.97	+	7.22	0.000151	0.0184
activation-induced cell death of T cells (GO:0006924)	7	2	0.28	+	7.07	0.0452	0.981
mitotic cell cycle arrest (GO:0071850)	14	4	0.57	+	7.07	0.00446	0.268
protein localization to nucleolus (GO:1902570)	7	2	0.28	+	7.07	0.0452	0.98
viral translation (GO:0019081)	14	4	0.57	+	7.07	0.00446	0.267
modulation by host of symbiont molecular function (GO:0052428)	7	2	0.28	+	7.07	0.0452	0.979
regulation of keratinocyte apoptotic process (GO:1902172)	7	2	0.28	+	7.07	0.0452	0.977
modulation of molecular function in other organism involved in symbiotic interaction (GO:0052205)	7	2	0.28	+	7.07	0.0452	0.976
7-methylguanosine mRNA capping (GO:0006370)	7	2	0.28	+	7.07	0.0452	0.975
positive regulation of hematopoietic stem cell proliferation (GO:1902035)	7	2	0.28	+	7.07	0.0452	0.973
modulation of molecular function in other organism (GO:0044359)	7	2	0.28	+	7.07	0.0452	0.972
polyadenylation-dependent snoRNA 3'-end processing (GO:0071051)	7	2	0.28	+	7.07	0.0452	0.971
5-phosphoribose 1-diphosphate biosynthetic process (GO:0006015)	7	2	0.28	+	7.07	0.0452	0.969
polyadenylation-dependent ncRNA catabolic process (GO:0043634)	7	2	0.28	+	7.07	0.0452	0.968
mitochondrial DNA repair (GO:0043504)	7	2	0.28	+	7.07	0.0452	0.967
ribosomal large subunit export from nucleus (GO:0000055)	7	2	0.28	+	7.07	0.0452	0.965
snoRNA processing (GO:0043144)	14	4	0.57	+	7.07	0.00446	0.266
deoxyribonucleoside triphosphate catabolic process (GO:0009204)	7	2	0.28	+	7.07	0.0452	0.964
pyrimidine nucleoside monophosphate biosynthetic process (GO:0009130)	7	2	0.28	+	7.07	0.0452	0.963
purine nucleobase biosynthetic process (GO:0009113)	7	2	0.28	+	7.07	0.0452	0.962
pteridine-containing compound biosynthetic process (GO:0042559)	14	4	0.57	+	7.07	0.00446	0.265
positive regulation of protein targeting to mitochondrion (GO:1903955)	7	2	0.28	+	7.07	0.0452	0.96
viral mRNA export from host cell nucleus (GO:0046784)	7	2	0.28	+	7.07	0.0452	0.959
water-soluble vitamin biosynthetic process (GO:0042364)	7	2	0.28	+	7.07	0.0452	0.958
response to laminar fluid shear stress (GO:0034616)	7	2	0.28	+	7.07	0.0452	0.956
Notch signaling involved in heart development (GO:0061314)	7	2	0.28	+	7.07	0.0452	0.955
negative regulation of photoreceptor cell differentiation (GO:0046533)	7	2	0.28	+	7.07	0.0452	0.954
cerebellar granule cell precursor proliferation (GO:0021930)	7	2	0.28	+	7.07	0.0452	0.953
cell proliferation in external granule layer (GO:0021924)	7	2	0.28	+	7.07	0.0452	0.951
5-phosphoribose 1-diphosphate metabolic process (GO:0046391)	7	2	0.28	+	7.07	0.0452	0.95
cytoplasmic translation (GO:0002181)	65	18	2.63	+	6.86	2.34e-09	5.86e-07
rRNA processing (GO:0006364)	201	55	8.12	+	6.78	1.31e-25	1.09e-22
membrane raft assembly (GO:0001765)	11	3	0.44	+	6.75	0.0154	0.567
attachment of mitotic spindle microtubules to kinetochore (GO:0051315)	11	3	0.44	+	6.75	0.0154	0.565
RNA polymerase II preinitiation complex assembly (GO:0051123)	11	3	0.44	+	6.75	0.0154	0.564
establishment of protein localization to chromosome (GO:0070199)	11	3	0.44	+	6.75	0.0154	0.563
positive regulation of necrotic cell death (GO:0010940)	11	3	0.44	+	6.75	0.0154	0.561
nuclear-transcribed mRNA catabolic process, exonucleolytic, 3'-5' (GO:0034427)	11	3	0.44	+	6.75	0.0154	0.56
cerebral cortex GABAergic interneuron differentiation (GO:0021892)	11	3	0.44	+	6.75	0.0154	0.559
RNA phosphodiester bond hydrolysis, exonucleolytic (GO:0090503)	15	4	0.61	+	6.6	0.00548	0.306
RNA surveillance (GO:0071025)	15	4	0.61	+	6.6	0.00548	0.305
tRNA 5'-end processing (GO:0099116)	15	4	0.61	+	6.6	0.00548	0.304
endonucleolytic cleavage of tricistronic rRNA transcript (SSU-rRNA, 5.8S rRNA, LSU-rRNA) (GO:0000479)	15	4	0.61	+	6.6	0.00548	0.303
endonucleolytic cleavage involved in rRNA processing (GO:0000478)	15	4	0.61	+	6.6	0.00548	0.302
GABAergic neuron differentiation (GO:0097154)	15	4	0.61	+	6.6	0.00548	0.3
maturation of SSU-rRNA (GO:0030490)	49	13	1.98	+	6.57	5.93e-07	0.000123
DNA strand elongation (GO:0022616)	19	5	0.77	+	6.52	0.002	0.148
rRNA metabolic process (GO:0016072)	210	55	8.48	+	6.49	7.9e-25	6.24e-22
nuclear DNA replication (GO:0033260)	23	6	0.93	+	6.46	0.000743	0.0698
transcription initiation from RNA polymerase II promoter (GO:0006367)	31	8	1.25	+	6.39	0.000105	0.0137
maturation of SSU-rRNA from tricistronic rRNA transcript (SSU-rRNA, 5.8S rRNA, LSU-rRNA) (GO:0000462)	35	9	1.41	+	6.37	4.01e-05	0.00586
negative regulation of endodermal cell differentiation (GO:1903225)	4	1	0.16	+	6.19	0.18	1
negative regulation of inner ear receptor cell differentiation (GO:2000981)	4	1	0.16	+	6.19	0.18	1
axon target recognition (GO:0007412)	4	1	0.16	+	6.19	0.18	1
triglyceride transport (GO:0034197)	4	1	0.16	+	6.19	0.18	1
acylglycerol transport (GO:0034196)	4	1	0.16	+	6.19	0.18	1
hypoxanthine metabolic process (GO:0046100)	4	1	0.16	+	6.19	0.18	1
nitrobenzene metabolic process (GO:0018916)	4	1	0.16	+	6.19	0.18	1
regulation of MyD88-dependent toll-like receptor signaling pathway (GO:0034124)	4	1	0.16	+	6.19	0.18	1
negative regulation of cell adhesion involved in substrate-bound cell migration (GO:0006933)	4	1	0.16	+	6.19	0.18	1
regulation of vascular permeability involved in acute inflammatory response (GO:0002528)	4	1	0.16	+	6.19	0.18	1
regulation of neutrophil differentiation (GO:0045658)	4	1	0.16	+	6.19	0.18	1
negative regulation of mechanoreceptor differentiation (GO:0045632)	4	1	0.16	+	6.19	0.18	1
negative regulation of inner ear auditory receptor cell differentiation (GO:0045608)	4	1	0.16	+	6.19	0.18	1
negative regulation of autophagy of mitochondrion (GO:1903147)	8	2	0.32	+	6.19	0.0551	1
compartment pattern specification (GO:0007386)	4	1	0.16	+	6.19	0.18	1
cytidine metabolic process (GO:0046087)	4	1	0.16	+	6.19	0.18	1
positive regulation of receptor localization to synapse (GO:1902685)	4	1	0.16	+	6.19	0.18	1
positive regulation of transcription by glucose (GO:0046016)	4	1	0.16	+	6.19	0.18	1
podosome assembly (GO:0071800)	4	1	0.16	+	6.19	0.18	1
rhombomere 5 development (GO:0021571)	4	1	0.16	+	6.19	0.18	1
rhombomere 3 development (GO:0021569)	4	1	0.16	+	6.19	0.18	1
floor plate morphogenesis (GO:0033505)	4	1	0.16	+	6.19	0.18	1
cell proliferation in hindbrain (GO:0021534)	8	2	0.32	+	6.19	0.0551	1
killing by symbiont of host cells (GO:0001907)	4	1	0.16	+	6.19	0.18	1
negative regulation of mesenchymal cell proliferation (GO:0072201)	8	2	0.32	+	6.19	0.0551	1
positive regulation of protein monoubiquitination (GO:1902527)	4	1	0.16	+	6.19	0.18	1
transcriptional activation by promoter-enhancer looping (GO:0071733)	4	1	0.16	+	6.19	0.18	1
negative regulation of ATP biosynthetic process (GO:2001170)	4	1	0.16	+	6.19	0.18	1
galactose catabolic process via UDP-galactose (GO:0033499)	4	1	0.16	+	6.19	0.18	1
T cell proliferation involved in immune response (GO:0002309)	4	1	0.16	+	6.19	0.18	1
trophectodermal cell proliferation (GO:0001834)	4	1	0.16	+	6.19	0.18	1
regulation of adenosine receptor signaling pathway (GO:0060167)	4	1	0.16	+	6.19	0.18	1
regulation of muscle filament sliding (GO:0032971)	4	1	0.16	+	6.19	0.18	1
phosphatidylserine biosynthetic process (GO:0006659)	4	1	0.16	+	6.19	0.18	1
negative regulation of chemokine (C-C motif) ligand 5 production (GO:0071650)	4	1	0.16	+	6.19	0.18	1
ATP generation from poly-ADP-D-ribose (GO:1990966)	4	1	0.16	+	6.19	0.18	1
adenosine 5'-(hexahydrogen pentaphosphate) catabolic process (GO:1901911)	4	1	0.16	+	6.19	0.18	1
adenosine 5'-(hexahydrogen pentaphosphate) metabolic process (GO:1901910)	4	1	0.16	+	6.19	0.18	1
diadenosine hexaphosphate catabolic process (GO:1901909)	4	1	0.16	+	6.19	0.18	1
diadenosine hexaphosphate metabolic process (GO:1901908)	4	1	0.16	+	6.19	0.18	1
diadenosine pentaphosphate catabolic process (GO:1901907)	4	1	0.16	+	6.19	0.18	1
diadenosine pentaphosphate metabolic process (GO:1901906)	4	1	0.16	+	6.19	0.18	1
somite specification (GO:0001757)	4	1	0.16	+	6.19	0.18	1
regulation of metanephric mesenchymal cell migration (GO:2000589)	4	1	0.16	+	6.19	0.18	1
positive regulation of ATP-dependent microtubule motor activity, plus-end-directed (GO:2000582)	4	1	0.16	+	6.19	0.18	1
regulation of ATP-dependent microtubule motor activity, plus-end-directed (GO:2000580)	4	1	0.16	+	6.19	0.18	1
cell quiescence (GO:0044838)	4	1	0.16	+	6.19	0.18	1
modulation by host of viral RNA genome replication (GO:0044830)	4	1	0.16	+	6.19	0.18	1
regulation of immunological synapse formation (GO:2000520)	4	1	0.16	+	6.19	0.18	1
chemokine (C-X-C motif) ligand 12 signaling pathway (GO:0038146)	4	1	0.16	+	6.19	0.18	1
polyamine catabolic process (GO:0006598)	4	1	0.16	+	6.19	0.18	1
translation reinitiation (GO:0002188)	4	1	0.16	+	6.19	0.18	1
arginine biosynthetic process (GO:0006526)	4	1	0.16	+	6.19	0.18	1
diphosphoinositol polyphosphate metabolic process (GO:0071543)	4	1	0.16	+	6.19	0.18	1
desmosome assembly (GO:0002159)	4	1	0.16	+	6.19	0.18	1
gamma-aminobutyric acid import (GO:0051939)	4	1	0.16	+	6.19	0.18	1
telomerase RNA stabilization (GO:0090669)	4	1	0.16	+	6.19	0.18	1
pericentric heterochromatin organization (GO:0140462)	4	1	0.16	+	6.19	0.18	1
positive regulation by organism of programmed cell death in other organism involved in symbiotic interaction (GO:0052330)	4	1	0.16	+	6.19	0.18	1
negative regulation of neuron maturation (GO:0014043)	4	1	0.16	+	6.19	0.18	1
positive regulation of synapse structural plasticity (GO:0051835)	4	1	0.16	+	6.19	0.18	1
left/right axis specification (GO:0070986)	12	3	0.48	+	6.19	0.0187	0.632
transcription initiation from mitochondrial promoter (GO:0006391)	4	1	0.16	+	6.19	0.18	1
negative regulation of mitochondrial membrane permeability involved in apoptotic process (GO:1902109)	4	1	0.16	+	6.19	0.18	1
cellular response to corticotropin-releasing hormone stimulus (GO:0071376)	4	1	0.16	+	6.19	0.18	1
cellular response to vitamin D (GO:0071305)	4	1	0.16	+	6.19	0.18	1
constitutive secretory pathway (GO:0045054)	4	1	0.16	+	6.19	0.18	1
protein insertion into mitochondrial outer membrane (GO:0045040)	4	1	0.16	+	6.19	0.18	1
DNA deamination (GO:0045006)	8	2	0.32	+	6.19	0.0551	1
negative regulation of mast cell apoptotic process (GO:0033026)	4	1	0.16	+	6.19	0.18	1
oxidative stress-induced premature senescence (GO:0090403)	4	1	0.16	+	6.19	0.18	1
negative regulation of male germ cell proliferation (GO:2000255)	4	1	0.16	+	6.19	0.18	1
positive regulation by symbiont of host apoptotic process (GO:0052151)	4	1	0.16	+	6.19	0.18	1
regulation of mitochondrial mRNA stability (GO:0044528)	4	1	0.16	+	6.19	0.18	1
lagging strand elongation (GO:0006273)	4	1	0.16	+	6.19	0.18	1
mitochondrial RNA 5'-end processing (GO:0000964)	4	1	0.16	+	6.19	0.18	1
DNA replication, synthesis of RNA primer (GO:0006269)	4	1	0.16	+	6.19	0.18	1
peptidyl-glycine modification (GO:0018201)	4	1	0.16	+	6.19	0.18	1
UTP biosynthetic process (GO:0006228)	8	2	0.32	+	6.19	0.0551	1
cytidine catabolic process (GO:0006216)	4	1	0.16	+	6.19	0.18	1
negative regulation of germ cell proliferation (GO:1905937)	4	1	0.16	+	6.19	0.18	1
positive regulation of cell aging (GO:0090343)	12	3	0.48	+	6.19	0.0187	0.631
negative regulation of branching morphogenesis of a nerve (GO:2000173)	4	1	0.16	+	6.19	0.18	1
age-dependent response to oxidative stress (GO:0001306)	4	1	0.16	+	6.19	0.18	1
positive regulation by symbiont of host programmed cell death (GO:0052042)	4	1	0.16	+	6.19	0.18	1
translocation of molecules into host (GO:0044417)	8	2	0.32	+	6.19	0.0551	1
peptidyl-cysteine oxidation (GO:0018171)	4	1	0.16	+	6.19	0.18	1
'de novo' IMP biosynthetic process (GO:0006189)	4	1	0.16	+	6.19	0.18	1
regulation of mitochondrial DNA replication (GO:0090296)	4	1	0.16	+	6.19	0.18	1
regulation of tetrapyrrole metabolic process (GO:1901401)	4	1	0.16	+	6.19	0.18	1
positive regulation of mast cell proliferation (GO:0070668)	4	1	0.16	+	6.19	0.18	1
gene looping (GO:0090202)	4	1	0.16	+	6.19	0.18	1
negative regulation of protein kinase activity by regulation of protein phosphorylation (GO:0044387)	8	2	0.32	+	6.19	0.0551	1
positive regulation of intracellular cholesterol transport (GO:0032385)	4	1	0.16	+	6.19	0.18	1
positive regulation of intracellular sterol transport (GO:0032382)	4	1	0.16	+	6.19	0.18	1
positive regulation of intracellular lipid transport (GO:0032379)	4	1	0.16	+	6.19	0.18	1
protein K27-linked ubiquitination (GO:0044314)	4	1	0.16	+	6.19	0.18	1
polyadenylation-dependent mRNA catabolic process (GO:0071047)	4	1	0.16	+	6.19	0.18	1
CUT metabolic process (GO:0071043)	4	1	0.16	+	6.19	0.18	1
nuclear polyadenylation-dependent mRNA catabolic process (GO:0071042)	4	1	0.16	+	6.19	0.18	1
CUT catabolic process (GO:0071034)	4	1	0.16	+	6.19	0.18	1
cytidine deamination (GO:0009972)	4	1	0.16	+	6.19	0.18	1
C-5 methylation of cytosine (GO:0090116)	4	1	0.16	+	6.19	0.18	1
skeletal muscle tissue growth (GO:0048630)	4	1	0.16	+	6.19	0.18	1
positive regulation of synaptic transmission, dopaminergic (GO:0032226)	4	1	0.16	+	6.19	0.18	1
telomere maintenance via semi-conservative replication (GO:0032201)	4	1	0.16	+	6.19	0.18	1
negative regulation of cyclic-nucleotide phosphodiesterase activity (GO:0051344)	4	1	0.16	+	6.19	0.18	1
regulation of receptor-mediated endocytosis involved in cholesterol transport (GO:1905600)	4	1	0.16	+	6.19	0.18	1
mitotic sister chromatid separation (GO:0051306)	4	1	0.16	+	6.19	0.18	1
polyadenylation-dependent RNA catabolic process (GO:0043633)	8	2	0.32	+	6.19	0.0551	1
negative regulation of lipopolysaccharide-mediated signaling pathway (GO:0031665)	8	2	0.32	+	6.19	0.0551	1
hypermethylation of CpG island (GO:0044027)	4	1	0.16	+	6.19	0.18	1
mitochondrial DNA metabolic process (GO:0032042)	12	3	0.48	+	6.19	0.0187	0.629
maturation of 5.8S rRNA from tricistronic rRNA transcript (SSU-rRNA, 5.8S rRNA, LSU-rRNA) (GO:0000466)	24	6	0.97	+	6.19	0.000898	0.081
peptidyl-threonine dephosphorylation (GO:0035970)	20	5	0.81	+	6.19	0.00242	0.171
negative regulation of vascular associated smooth muscle cell apoptotic process (GO:1905460)	4	1	0.16	+	6.19	0.18	1
pericentric heterochromatin assembly (GO:0031508)	4	1	0.16	+	6.19	0.18	1
negative regulation of defense response to virus by host (GO:0050689)	4	1	0.16	+	6.19	0.18	1
positive regulation of cytochrome-c oxidase activity (GO:1904960)	4	1	0.16	+	6.19	0.18	1
sphingolipid translocation (GO:0099039)	4	1	0.16	+	6.19	0.18	1
positive regulation of snRNA transcription by RNA polymerase II (GO:1905382)	4	1	0.16	+	6.19	0.18	1
regulation of snRNA transcription by RNA polymerase II (GO:1905380)	4	1	0.16	+	6.19	0.18	1
regulation of fermentation (GO:0043465)	4	1	0.16	+	6.19	0.18	1
regulation of pentose-phosphate shunt (GO:0043456)	4	1	0.16	+	6.19	0.18	1
positive regulation of protein localization to kinetochore (GO:1905342)	4	1	0.16	+	6.19	0.18	1
regulation of protein localization to kinetochore (GO:1905340)	4	1	0.16	+	6.19	0.18	1
response to corticotropin-releasing hormone (GO:0043435)	4	1	0.16	+	6.19	0.18	1
positive regulation of telomerase RNA localization to Cajal body (GO:1904874)	4	1	0.16	+	6.19	0.18	1
mitochondrial translational elongation (GO:0070125)	4	1	0.16	+	6.19	0.18	1
RNA capping (GO:0036260)	8	2	0.32	+	6.19	0.0551	1
establishment or maintenance of microtubule cytoskeleton polarity (GO:0030951)	4	1	0.16	+	6.19	0.18	1
neutrophil degranulation (GO:0043312)	4	1	0.16	+	6.19	0.18	1
7-methylguanosine RNA capping (GO:0009452)	8	2	0.32	+	6.19	0.0551	1
regulation of myofibroblast differentiation (GO:1904760)	4	1	0.16	+	6.19	0.18	1
regulation of telomeric DNA binding (GO:1904742)	4	1	0.16	+	6.19	0.18	1
male germ-line stem cell asymmetric division (GO:0048133)	4	1	0.16	+	6.19	0.18	1
positive regulation of electron transfer activity (GO:1904734)	4	1	0.16	+	6.19	0.18	1
articular cartilage development (GO:0061975)	4	1	0.16	+	6.19	0.18	1
sulfur amino acid transport (GO:0000101)	4	1	0.16	+	6.19	0.18	1
tRNA 3'-end processing (GO:0042780)	8	2	0.32	+	6.19	0.0551	1
germ cell proliferation (GO:0036093)	4	1	0.16	+	6.19	0.18	1
protein O-linked fucosylation (GO:0036066)	4	1	0.16	+	6.19	0.18	1
regulation of cardiolipin metabolic process (GO:1900208)	4	1	0.16	+	6.19	0.18	1
sequestering of BMP in extracellular matrix (GO:0035582)	4	1	0.16	+	6.19	0.18	1
ribosomal small subunit assembly (GO:0000028)	20	5	0.81	+	6.19	0.00242	0.171
negative regulation of vascular associated smooth muscle cell differentiation (GO:1905064)	8	2	0.32	+	6.19	0.0551	1
regulation of intracellular mRNA localization (GO:1904580)	4	1	0.16	+	6.19	0.18	1
regulation of DNA stability (GO:0097752)	4	1	0.16	+	6.19	0.18	1
membrane tubulation (GO:0097749)	4	1	0.16	+	6.19	0.18	1
positive regulation of histone H3-K9 trimethylation (GO:1900114)	4	1	0.16	+	6.19	0.18	1
pyrimidine deoxyribonucleoside monophosphate biosynthetic process (GO:0009177)	4	1	0.16	+	6.19	0.18	1
deoxyribonucleoside monophosphate biosynthetic process (GO:0009157)	4	1	0.16	+	6.19	0.18	1
pyrimidine nucleoside triphosphate metabolic process (GO:0009147)	16	4	0.65	+	6.19	0.00665	0.343
positive regulation of hemoglobin biosynthetic process (GO:0046985)	4	1	0.16	+	6.19	0.18	1
pyrimidine nucleoside monophosphate metabolic process (GO:0009129)	8	2	0.32	+	6.19	0.0551	1
histone arginine methylation (GO:0034969)	8	2	0.32	+	6.19	0.0551	1
Cajal body organization (GO:0030576)	4	1	0.16	+	6.19	0.18	1
positive regulation of programmed necrotic cell death (GO:0062100)	4	1	0.16	+	6.19	0.18	1
negative regulation of ceramide biosynthetic process (GO:1900060)	4	1	0.16	+	6.19	0.18	1
selenocysteine metabolic process (GO:0016259)	4	1	0.16	+	6.19	0.18	1
negative regulation of very-low-density lipoprotein particle clearance (GO:0010916)	4	1	0.16	+	6.19	0.18	1
regulation of very-low-density lipoprotein particle clearance (GO:0010915)	4	1	0.16	+	6.19	0.18	1
glycolytic process through glucose-1-phosphate (GO:0061622)	4	1	0.16	+	6.19	0.18	1
regulation of establishment of T cell polarity (GO:1903903)	4	1	0.16	+	6.19	0.18	1
positive regulation of skeletal muscle acetylcholine-gated channel clustering (GO:1904395)	4	1	0.16	+	6.19	0.18	1
synaptic vesicle budding from endosome (GO:0016182)	4	1	0.16	+	6.19	0.18	1
tRNA catabolic process (GO:0016078)	8	2	0.32	+	6.19	0.0551	1
snoRNA metabolic process (GO:0016074)	16	4	0.65	+	6.19	0.00665	0.342
positive regulation of transcription via serum response element binding (GO:0010735)	4	1	0.16	+	6.19	0.18	1
modulation by virus of host apoptotic process (GO:0039526)	4	1	0.16	+	6.19	0.18	1
peptidyl-arginine methylation, to asymmetrical-dimethyl arginine (GO:0019919)	4	1	0.16	+	6.19	0.18	1
left/right pattern formation (GO:0060972)	24	6	0.97	+	6.19	0.000898	0.0805
ribosome assembly (GO:0042255)	64	16	2.58	+	6.19	6.1e-08	1.4e-05
axonemal central apparatus assembly (GO:1904158)	4	1	0.16	+	6.19	0.18	1
L-ascorbic acid biosynthetic process (GO:0019853)	4	1	0.16	+	6.19	0.18	1
ciliary receptor clustering involved in smoothened signaling pathway (GO:0060830)	4	1	0.16	+	6.19	0.18	1
spermidine biosynthetic process (GO:0008295)	4	1	0.16	+	6.19	0.18	1
regulation of G protein-coupled receptor internalization (GO:1904020)	4	1	0.16	+	6.19	0.18	1
negative regulation of humoral immune response mediated by circulating immunoglobulin (GO:0002924)	4	1	0.16	+	6.19	0.18	1
response to actinomycin D (GO:0072716)	4	1	0.16	+	6.19	0.18	1
striated muscle atrophy (GO:0014891)	4	1	0.16	+	6.19	0.18	1
positive regulation of complement activation (GO:0045917)	4	1	0.16	+	6.19	0.18	1
neuroendocrine cell differentiation (GO:0061101)	8	2	0.32	+	6.19	0.0551	1
regulation of transcription from RNA polymerase II promoter involved in ventral spinal cord interneuron specification (GO:0021913)	4	1	0.16	+	6.19	0.18	1
positive regulation of transcription from RNA polymerase II promoter involved in myocardial precursor cell differentiation (GO:0003257)	4	1	0.16	+	6.19	0.18	1
negative regulation of transcription initiation from RNA polymerase II promoter (GO:0060633)	4	1	0.16	+	6.19	0.18	1
glial cell apoptotic process (GO:0034349)	4	1	0.16	+	6.19	0.18	1
type B pancreatic cell apoptotic process (GO:0097050)	4	1	0.16	+	6.19	0.18	1
age-dependent general metabolic decline (GO:0007571)	4	1	0.16	+	6.19	0.18	1
regulation of postsynaptic density protein 95 clustering (GO:1902897)	4	1	0.16	+	6.19	0.18	1
ribosome biogenesis (GO:0042254)	288	71	11.63	+	6.1	2.26e-30	2.38e-27
negative regulation of focal adhesion assembly (GO:0051895)	17	4	0.69	+	5.83	0.00796	0.382
negative regulation of cell-substrate junction organization (GO:0150118)	17	4	0.69	+	5.83	0.00796	0.381
tRNA 5'-leader removal (GO:0001682)	13	3	0.53	+	5.71	0.0224	0.691
DNA damage response, signal transduction resulting in transcription (GO:0042772)	13	3	0.53	+	5.71	0.0224	0.69
nucleoside triphosphate catabolic process (GO:0009143)	13	3	0.53	+	5.71	0.0224	0.688
negative regulation of substrate adhesion-dependent cell spreading (GO:1900025)	13	3	0.53	+	5.71	0.0224	0.687
glutamine family amino acid biosynthetic process (GO:0009084)	13	3	0.53	+	5.71	0.0224	0.686
forebrain neuron fate commitment (GO:0021877)	13	3	0.53	+	5.71	0.0224	0.684
regulation of protein folding (GO:1903332)	13	3	0.53	+	5.71	0.0224	0.683
ncRNA 3'-end processing (GO:0043628)	39	9	1.58	+	5.71	8.25e-05	0.011
ribonucleoprotein complex biogenesis (GO:0022613)	400	89	16.15	+	5.51	5.74e-35	1.01e-31
integrin activation (GO:0033622)	9	2	0.36	+	5.5	0.0656	1
UTP metabolic process (GO:0046051)	9	2	0.36	+	5.5	0.0656	1
CTP metabolic process (GO:0046036)	9	2	0.36	+	5.5	0.0656	1
L-phenylalanine metabolic process (GO:0006558)	9	2	0.36	+	5.5	0.0656	1
mitochondrial tRNA processing (GO:0090646)	9	2	0.36	+	5.5	0.0656	1
erythrose 4-phosphate/phosphoenolpyruvate family amino acid metabolic process (GO:1902221)	9	2	0.36	+	5.5	0.0656	1
pseudouridine synthesis (GO:0001522)	18	4	0.73	+	5.5	0.00944	0.426
negative regulation of oxidative stress-induced intrinsic apoptotic signaling pathway (GO:1902176)	18	4	0.73	+	5.5	0.00944	0.424
protein transport within lipid bilayer (GO:0032594)	9	2	0.36	+	5.5	0.0656	1
CTP biosynthetic process (GO:0006241)	9	2	0.36	+	5.5	0.0656	1
regulation of release of cytochrome c from mitochondria (GO:0090199)	45	10	1.82	+	5.5	4.42e-05	0.00628
positive regulation of ligase activity (GO:0051351)	9	2	0.36	+	5.5	0.0656	1
exonucleolytic trimming to generate mature 3'-end of 5.8S rRNA from tricistronic rRNA transcript (SSU-rRNA, 5.8S rRNA, LSU-rRNA) (GO:0000467)	9	2	0.36	+	5.5	0.0656	1
exonucleolytic trimming involved in rRNA processing (GO:0000459)	9	2	0.36	+	5.5	0.0656	1
nucleotide-binding domain, leucine rich repeat containing receptor signaling pathway (GO:0035872)	9	2	0.36	+	5.5	0.0656	1
spliceosomal tri-snRNP complex assembly (GO:0000244)	9	2	0.36	+	5.5	0.0656	1
regulation of protein localization to nucleolus (GO:1904749)	9	2	0.36	+	5.5	0.0656	1
folic acid-containing compound biosynthetic process (GO:0009396)	9	2	0.36	+	5.5	0.0656	1
telomere maintenance in response to DNA damage (GO:0043247)	9	2	0.36	+	5.5	0.0656	1
negative regulation of transcription by competitive promoter binding (GO:0010944)	9	2	0.36	+	5.5	0.0656	1
viral budding via host ESCRT complex (GO:0039702)	9	2	0.36	+	5.5	0.0656	1
ribosomal small subunit biogenesis (GO:0042274)	72	16	2.91	+	5.5	2.45e-07	5.3e-05
protein import into mitochondrial matrix (GO:0030150)	18	4	0.73	+	5.5	0.00944	0.423
spermidine metabolic process (GO:0008216)	9	2	0.36	+	5.5	0.0656	1
ruffle organization (GO:0031529)	27	6	1.09	+	5.5	0.00152	0.122
regulation of rRNA processing (GO:2000232)	14	3	0.57	+	5.31	0.0264	0.759
DNA double-strand break processing (GO:0000729)	14	3	0.57	+	5.31	0.0264	0.757
protein localization to chromosome, telomeric region (GO:0070198)	14	3	0.57	+	5.31	0.0264	0.756
negative regulation of tyrosine phosphorylation of STAT protein (GO:0042532)	14	3	0.57	+	5.31	0.0264	0.755
negative regulation of cell morphogenesis involved in differentiation (GO:0010771)	14	3	0.57	+	5.31	0.0264	0.753
hepatocyte apoptotic process (GO:0097284)	14	3	0.57	+	5.31	0.0264	0.752
regulation of protein targeting to mitochondrion (GO:1903214)	19	4	0.77	+	5.21	0.0111	0.478
deoxyribonucleoside triphosphate metabolic process (GO:0009200)	19	4	0.77	+	5.21	0.0111	0.476
translation (GO:0006412)	304	63	12.28	+	5.13	1.51e-23	9.18e-21
snRNA metabolic process (GO:0016073)	34	7	1.37	+	5.1	0.000919	0.082
ncRNA processing (GO:0034470)	347	71	14.01	+	5.07	3.97e-26	3.48e-23
ribonucleoprotein complex assembly (GO:0022618)	168	34	6.78	+	5.01	4.92e-13	1.62e-10
response to lead ion (GO:0010288)	10	2	0.4	+	4.95	0.0768	1
response to selenium ion (GO:0010269)	5	1	0.2	+	4.95	0.211	1
negative regulation of hypoxia-induced intrinsic apoptotic signaling pathway (GO:1903298)	5	1	0.2	+	4.95	0.211	1
regulation of hypoxia-induced intrinsic apoptotic signaling pathway (GO:1903297)	5	1	0.2	+	4.95	0.211	1
ribosome localization (GO:0033750)	15	3	0.61	+	4.95	0.0308	0.815
glial cell fate specification (GO:0021780)	5	1	0.2	+	4.95	0.211	1
oligodendrocyte cell fate commitment (GO:0021779)	5	1	0.2	+	4.95	0.211	1
oligodendrocyte cell fate specification (GO:0021778)	5	1	0.2	+	4.95	0.211	1
melanosome assembly (GO:1903232)	5	1	0.2	+	4.95	0.211	1
regulation of inner ear receptor cell differentiation (GO:2000980)	10	2	0.4	+	4.95	0.0768	1
ventral midline development (GO:0007418)	5	1	0.2	+	4.95	0.211	1
DNA damage response, signal transduction by p53 class mediator resulting in cell cycle arrest (GO:0006977)	10	2	0.4	+	4.95	0.0768	1
nucleobase biosynthetic process (GO:0046112)	15	3	0.61	+	4.95	0.0308	0.814
negative regulation of megakaryocyte differentiation (GO:0045653)	5	1	0.2	+	4.95	0.211	1
positive regulation of melanocyte differentiation (GO:0045636)	5	1	0.2	+	4.95	0.211	1
regulation of mechanoreceptor differentiation (GO:0045631)	10	2	0.4	+	4.95	0.0768	1
galactose catabolic process (GO:0019388)	5	1	0.2	+	4.95	0.211	1
regulation of inner ear auditory receptor cell differentiation (GO:0045607)	10	2	0.4	+	4.95	0.0768	1
dolichol metabolic process (GO:0019348)	5	1	0.2	+	4.95	0.211	1
positive regulation of cell adhesion molecule production (GO:0060355)	5	1	0.2	+	4.95	0.211	1
dGTP metabolic process (GO:0046070)	5	1	0.2	+	4.95	0.211	1
regulation of transcription by glucose (GO:0046015)	5	1	0.2	+	4.95	0.211	1
regulation of cysteine-type endopeptidase activity involved in execution phase of apoptosis (GO:2001270)	5	1	0.2	+	4.95	0.211	1
positive regulation of cysteine-type endopeptidase activity involved in apoptotic signaling pathway (GO:2001269)	10	2	0.4	+	4.95	0.0768	1
cytoplasmic sequestering of NF-kappaB (GO:0007253)	5	1	0.2	+	4.95	0.211	1
spinal cord oligodendrocyte cell differentiation (GO:0021529)	5	1	0.2	+	4.95	0.211	1
negative regulation of respiratory burst involved in inflammatory response (GO:0060266)	5	1	0.2	+	4.95	0.211	1
hematopoietic stem cell differentiation (GO:0060218)	15	3	0.61	+	4.95	0.0308	0.812
regulation of protein monoubiquitination (GO:1902525)	5	1	0.2	+	4.95	0.211	1
negative regulation of CD8-positive, alpha-beta T cell activation (GO:2001186)	5	1	0.2	+	4.95	0.211	1
adenylate cyclase-inhibiting dopamine receptor signaling pathway (GO:0007195)	5	1	0.2	+	4.95	0.211	1
regulation of timing of neuron differentiation (GO:0060164)	5	1	0.2	+	4.95	0.211	1
inner ear receptor cell fate commitment (GO:0060120)	5	1	0.2	+	4.95	0.211	1
microglial cell activation involved in immune response (GO:0002282)	5	1	0.2	+	4.95	0.211	1
viral gene expression (GO:0019080)	20	4	0.81	+	4.95	0.0129	0.526
loop of Henle development (GO:0072070)	10	2	0.4	+	4.95	0.0768	1
positive regulation of microtubule motor activity (GO:2000576)	5	1	0.2	+	4.95	0.211	1
plasma membrane raft assembly (GO:0044854)	5	1	0.2	+	4.95	0.211	1
proximal tubule development (GO:0072014)	5	1	0.2	+	4.95	0.211	1
proline metabolic process (GO:0006560)	10	2	0.4	+	4.95	0.0768	1
nuclear cell cycle DNA replication initiation (GO:1902315)	5	1	0.2	+	4.95	0.211	1
asparagine metabolic process (GO:0006528)	5	1	0.2	+	4.95	0.211	1
RNA localization to nucleus (GO:0090685)	5	1	0.2	+	4.95	0.211	1
RNA localization to Cajal body (GO:0090670)	5	1	0.2	+	4.95	0.211	1
scaRNA localization to Cajal body (GO:0090666)	5	1	0.2	+	4.95	0.211	1
dsRNA transport (GO:0033227)	5	1	0.2	+	4.95	0.211	1
positive regulation of glycogen (starch) synthase activity (GO:2000467)	5	1	0.2	+	4.95	0.211	1
cell cycle DNA replication initiation (GO:1902292)	5	1	0.2	+	4.95	0.211	1
negative regulation of protein neddylation (GO:2000435)	5	1	0.2	+	4.95	0.211	1
regulation of intrinsic apoptotic signaling pathway in response to osmotic stress (GO:1902218)	5	1	0.2	+	4.95	0.211	1
inhibition of neuroepithelial cell differentiation (GO:0002085)	5	1	0.2	+	4.95	0.211	1
cellular response to hyperoxia (GO:0071455)	5	1	0.2	+	4.95	0.211	1
translational initiation (GO:0006413)	55	11	2.22	+	4.95	4.32e-05	0.00619
neuroblast differentiation (GO:0014016)	5	1	0.2	+	4.95	0.211	1
dsDNA loop formation (GO:0090579)	5	1	0.2	+	4.95	0.211	1
RNA phosphodiester bond hydrolysis (GO:0090501)	70	14	2.83	+	4.95	4.04e-06	0.000758
positive regulation of vesicle transport along microtubule (GO:1901610)	5	1	0.2	+	4.95	0.211	1
regulation of mast cell apoptotic process (GO:0033025)	5	1	0.2	+	4.95	0.211	1
positive regulation of rRNA processing (GO:2000234)	10	2	0.4	+	4.95	0.0768	1
base-excision repair, gap-filling (GO:0006287)	5	1	0.2	+	4.95	0.211	1
mitochondrial RNA 3'-end processing (GO:0000965)	5	1	0.2	+	4.95	0.211	1
DNA unwinding involved in DNA replication (GO:0006268)	15	3	0.61	+	4.95	0.0308	0.811
protein K69-linked ufmylation (GO:1990592)	5	1	0.2	+	4.95	0.211	1
protein polyufmylation (GO:1990564)	5	1	0.2	+	4.95	0.211	1
negative regulation of DNA-templated transcription, initiation (GO:2000143)	5	1	0.2	+	4.95	0.211	1
regulation of removal of superoxide radicals (GO:2000121)	5	1	0.2	+	4.95	0.211	1
GTP biosynthetic process (GO:0006183)	10	2	0.4	+	4.95	0.0768	1
IRES-dependent viral translational initiation (GO:0075522)	10	2	0.4	+	4.95	0.0768	1
negative regulation of glucocorticoid biosynthetic process (GO:0031947)	5	1	0.2	+	4.95	0.211	1
negative regulation of glucocorticoid metabolic process (GO:0031944)	5	1	0.2	+	4.95	0.211	1
branching morphogenesis of a nerve (GO:0048755)	5	1	0.2	+	4.95	0.211	1
negative regulation of phospholipid biosynthetic process (GO:0071072)	5	1	0.2	+	4.95	0.211	1
nuclear retention of pre-mRNA at the site of transcription (GO:0071033)	5	1	0.2	+	4.95	0.211	1
myoblast proliferation (GO:0051450)	5	1	0.2	+	4.95	0.211	1
auditory receptor cell fate commitment (GO:0009912)	5	1	0.2	+	4.95	0.211	1
positive regulation of adenylate cyclase-activating G protein-coupled receptor signaling pathway (GO:0106071)	5	1	0.2	+	4.95	0.211	1
telomere assembly (GO:0032202)	5	1	0.2	+	4.95	0.211	1
peptidyl-tyrosine dephosphorylation involved in inactivation of protein kinase activity (GO:1990264)	10	2	0.4	+	4.95	0.0768	1
regulation of ligase activity (GO:0051340)	10	2	0.4	+	4.95	0.0768	1
mitotic cell cycle phase (GO:0098763)	5	1	0.2	+	4.95	0.211	1
recognition of apoptotic cell (GO:0043654)	5	1	0.2	+	4.95	0.211	1
germline stem cell asymmetric division (GO:0098728)	5	1	0.2	+	4.95	0.211	1
maintenance of animal organ identity (GO:0048496)	5	1	0.2	+	4.95	0.211	1
negative regulation of G0 to G1 transition (GO:0070317)	5	1	0.2	+	4.95	0.211	1
positive regulation of deoxyribonuclease activity (GO:0032077)	5	1	0.2	+	4.95	0.211	1
multi-organism metabolic process (GO:0044033)	5	1	0.2	+	4.95	0.211	1
activation of protein kinase C activity (GO:1990051)	5	1	0.2	+	4.95	0.211	1
spliceosomal conformational changes to generate catalytic conformation (GO:0000393)	5	1	0.2	+	4.95	0.211	1
regulation of endosome size (GO:0051036)	5	1	0.2	+	4.95	0.211	1
snoRNA localization (GO:0048254)	5	1	0.2	+	4.95	0.211	1
macrophage chemotaxis (GO:0048246)	15	3	0.61	+	4.95	0.0308	0.81
regulation of interleukin-6-mediated signaling pathway (GO:0070103)	5	1	0.2	+	4.95	0.211	1
intraciliary retrograde transport (GO:0035721)	15	3	0.61	+	4.95	0.0308	0.808
cellular response to L-glutamate (GO:1905232)	5	1	0.2	+	4.95	0.211	1
response to insecticide (GO:0017085)	5	1	0.2	+	4.95	0.211	1
natural killer cell degranulation (GO:0043320)	5	1	0.2	+	4.95	0.211	1
positive regulation of glucagon secretion (GO:0070094)	5	1	0.2	+	4.95	0.211	1
negative regulation of secondary metabolite biosynthetic process (GO:1900377)	5	1	0.2	+	4.95	0.211	1
activation of MAPKKK activity (GO:0000185)	10	2	0.4	+	4.95	0.0768	1
stress granule disassembly (GO:0035617)	5	1	0.2	+	4.95	0.211	1
snRNA transcription by RNA polymerase II (GO:0042795)	10	2	0.4	+	4.95	0.0768	1
negative regulation of melanin biosynthetic process (GO:0048022)	5	1	0.2	+	4.95	0.211	1
cellular response to interleukin-3 (GO:0036016)	5	1	0.2	+	4.95	0.211	1
response to interleukin-3 (GO:0036015)	5	1	0.2	+	4.95	0.211	1
ribosomal subunit export from nucleus (GO:0000054)	15	3	0.61	+	4.95	0.0308	0.807
diadenosine polyphosphate catabolic process (GO:0015961)	5	1	0.2	+	4.95	0.211	1
relaxation of cardiac muscle (GO:0055119)	10	2	0.4	+	4.95	0.0768	1
protein K29-linked ubiquitination (GO:0035519)	5	1	0.2	+	4.95	0.211	1
tRNA pseudouridine synthesis (GO:0031119)	5	1	0.2	+	4.95	0.211	1
pyrimidine ribonucleotide biosynthetic process (GO:0009220)	15	3	0.61	+	4.95	0.0308	0.806
pyrimidine ribonucleoside triphosphate biosynthetic process (GO:0009209)	10	2	0.4	+	4.95	0.0768	1
positive regulation of vascular wound healing (GO:0035470)	5	1	0.2	+	4.95	0.211	1
pyrimidine deoxyribonucleoside monophosphate metabolic process (GO:0009176)	5	1	0.2	+	4.95	0.211	1
chromatin remodeling at centromere (GO:0031055)	10	2	0.4	+	4.95	0.0768	1
R-loop disassembly (GO:0062176)	5	1	0.2	+	4.95	0.211	1
negative regulation of SMAD protein complex assembly (GO:0010991)	5	1	0.2	+	4.95	0.211	1
positive regulation of lipoprotein particle clearance (GO:0010986)	5	1	0.2	+	4.95	0.211	1
positive regulation of isomerase activity (GO:0010912)	5	1	0.2	+	4.95	0.211	1
attachment of spindle microtubules to kinetochore (GO:0008608)	20	4	0.81	+	4.95	0.0129	0.525
regulation of isomerase activity (GO:0010911)	5	1	0.2	+	4.95	0.211	1
synaptic vesicle uncoating (GO:0016191)	5	1	0.2	+	4.95	0.211	1
negative regulation of dendrite extension (GO:1903860)	5	1	0.2	+	4.95	0.211	1
peptidyl-arginine omega-N-methylation (GO:0035247)	5	1	0.2	+	4.95	0.211	1
regulation of vesicle size (GO:0097494)	10	2	0.4	+	4.95	0.0768	1
positive regulation of establishment of protein localization to mitochondrion (GO:1903749)	10	2	0.4	+	4.95	0.0768	1
negative regulation of phospholipid metabolic process (GO:1903726)	5	1	0.2	+	4.95	0.211	1
folic acid metabolic process (GO:0046655)	5	1	0.2	+	4.95	0.211	1
ectodermal cell differentiation (GO:0010668)	5	1	0.2	+	4.95	0.211	1
development of secondary female sexual characteristics (GO:0046543)	10	2	0.4	+	4.95	0.0768	1
regulation of photoreceptor cell differentiation (GO:0046532)	10	2	0.4	+	4.95	0.0768	1
xenobiotic catabolic process (GO:0042178)	15	3	0.61	+	4.95	0.0308	0.804
desmosome organization (GO:0002934)	10	2	0.4	+	4.95	0.0768	1
positive regulation of histamine secretion by mast cell (GO:1903595)	5	1	0.2	+	4.95	0.211	1
regulation of histamine secretion by mast cell (GO:1903593)	5	1	0.2	+	4.95	0.211	1
snRNA 3'-end processing (GO:0034472)	20	4	0.81	+	4.95	0.0129	0.523
germ-line stem cell division (GO:0042078)	5	1	0.2	+	4.95	0.211	1
spongiotrophoblast differentiation (GO:0060708)	5	1	0.2	+	4.95	0.211	1
cholesterol esterification (GO:0034435)	5	1	0.2	+	4.95	0.211	1
sterol esterification (GO:0034434)	5	1	0.2	+	4.95	0.211	1
steroid esterification (GO:0034433)	5	1	0.2	+	4.95	0.211	1
protein refolding (GO:0042026)	15	3	0.61	+	4.95	0.0308	0.803
carbon catabolite activation of transcription (GO:0045991)	5	1	0.2	+	4.95	0.211	1
carbon catabolite regulation of transcription (GO:0045990)	5	1	0.2	+	4.95	0.211	1
negative regulation of translational elongation (GO:0045900)	5	1	0.2	+	4.95	0.211	1
formation of radial glial scaffolds (GO:0021943)	5	1	0.2	+	4.95	0.211	1
maintenance of protein location in mitochondrion (GO:0072656)	5	1	0.2	+	4.95	0.211	1
deoxyribose phosphate catabolic process (GO:0046386)	10	2	0.4	+	4.95	0.0768	1
mitotic DNA replication initiation (GO:1902975)	5	1	0.2	+	4.95	0.211	1
motor neuron apoptotic process (GO:0097049)	5	1	0.2	+	4.95	0.211	1
COP9 signalosome assembly (GO:0010387)	5	1	0.2	+	4.95	0.211	1
regulation of muscle atrophy (GO:0014735)	5	1	0.2	+	4.95	0.211	1
ciliary body morphogenesis (GO:0061073)	5	1	0.2	+	4.95	0.211	1
positive regulation of NAD(P)H oxidase activity (GO:0033864)	5	1	0.2	+	4.95	0.211	1
ribonucleoprotein complex subunit organization (GO:0071826)	175	35	7.07	+	4.95	3.01e-13	1.01e-10
peptide biosynthetic process (GO:0043043)	323	63	13.04	+	4.83	2.44e-22	1.42e-19
cytoplasmic translational initiation (GO:0002183)	21	4	0.85	+	4.72	0.0149	0.558
response to UV-B (GO:0010224)	16	3	0.65	+	4.64	0.0355	0.876
rRNA-containing ribonucleoprotein complex export from nucleus (GO:0071428)	16	3	0.65	+	4.64	0.0355	0.875
DNA replication-independent nucleosome assembly (GO:0006336)	16	3	0.65	+	4.64	0.0355	0.873
transcription preinitiation complex assembly (GO:0070897)	16	3	0.65	+	4.64	0.0355	0.872
negative regulation of oligodendrocyte differentiation (GO:0048715)	16	3	0.65	+	4.64	0.0355	0.871
spliceosomal snRNP assembly (GO:0000387)	32	6	1.29	+	4.64	0.00321	0.211
nuclear-transcribed mRNA catabolic process, exonucleolytic (GO:0000291)	16	3	0.65	+	4.64	0.0355	0.869
Arp2/3 complex-mediated actin nucleation (GO:0034314)	16	3	0.65	+	4.64	0.0355	0.868
regulation of oxidative stress-induced intrinsic apoptotic signaling pathway (GO:1902175)	27	5	1.09	+	4.59	0.00734	0.368
signal transduction involved in mitotic G1 DNA damage checkpoint (GO:0072431)	11	2	0.44	+	4.5	0.0885	1
lipoxygenase pathway (GO:0019372)	11	2	0.44	+	4.5	0.0885	1
intracellular signal transduction involved in G1 DNA damage checkpoint (GO:1902400)	11	2	0.44	+	4.5	0.0885	1
positive regulation of mitochondrial depolarization (GO:0051901)	11	2	0.44	+	4.5	0.0885	1
positive regulation of intrinsic apoptotic signaling pathway in response to DNA damage (GO:1902231)	11	2	0.44	+	4.5	0.0885	1
peptidyl-proline hydroxylation to 4-hydroxy-L-proline (GO:0018401)	11	2	0.44	+	4.5	0.0885	1
DNA replication-dependent nucleosome assembly (GO:0006335)	11	2	0.44	+	4.5	0.0885	1
regulation of hematopoietic stem cell differentiation (GO:1902036)	11	2	0.44	+	4.5	0.0885	1
mitochondrial DNA replication (GO:0006264)	11	2	0.44	+	4.5	0.0885	1
peptidyl-arginine methylation (GO:0018216)	11	2	0.44	+	4.5	0.0885	1
pyrimidine nucleotide biosynthetic process (GO:0006221)	22	4	0.89	+	4.5	0.0171	0.592
cellular response to antibiotic (GO:0071236)	11	2	0.44	+	4.5	0.0885	1
postsynaptic actin cytoskeleton organization (GO:0098974)	11	2	0.44	+	4.5	0.0885	1
postsynaptic cytoskeleton organization (GO:0099188)	11	2	0.44	+	4.5	0.0885	1
amyloid fibril formation (GO:1990000)	11	2	0.44	+	4.5	0.0885	1
positive regulation of mitochondrial outer membrane permeabilization involved in apoptotic signaling pathway (GO:1901030)	11	2	0.44	+	4.5	0.0885	1
deoxyribonucleotide catabolic process (GO:0009264)	11	2	0.44	+	4.5	0.0885	1
pyrimidine deoxyribonucleotide metabolic process (GO:0009219)	11	2	0.44	+	4.5	0.0885	1
pyrimidine ribonucleoside triphosphate metabolic process (GO:0009208)	11	2	0.44	+	4.5	0.0885	1
dendrite extension (GO:0097484)	11	2	0.44	+	4.5	0.0885	1
DNA replication-dependent nucleosome organization (GO:0034723)	11	2	0.44	+	4.5	0.0885	1
negative regulation of viral entry into host cell (GO:0046597)	22	4	0.89	+	4.5	0.0171	0.591
negative regulation of humoral immune response (GO:0002921)	11	2	0.44	+	4.5	0.0885	1
cellular response to granulocyte macrophage colony-stimulating factor stimulus (GO:0097011)	11	2	0.44	+	4.5	0.0885	1
protein targeting to mitochondrion (GO:0006626)	56	10	2.26	+	4.42	0.000217	0.025
ncRNA metabolic process (GO:0034660)	424	75	17.12	+	4.38	4.01e-24	2.75e-21
cellular response to exogenous dsRNA (GO:0071360)	17	3	0.69	+	4.37	0.0406	0.924
base-excision repair (GO:0006284)	34	6	1.37	+	4.37	0.00418	0.255
rRNA transcription (GO:0009303)	17	3	0.69	+	4.37	0.0406	0.922
nuclear body organization (GO:0030575)	17	3	0.69	+	4.37	0.0406	0.921
positive regulation of protein export from nucleus (GO:0046827)	17	3	0.69	+	4.37	0.0406	0.92
positive regulation of TORC1 signaling (GO:1904263)	17	3	0.69	+	4.37	0.0406	0.919
DNA replication-independent nucleosome organization (GO:0034724)	17	3	0.69	+	4.37	0.0406	0.917
regulation of transcription involved in cell fate commitment (GO:0060850)	17	3	0.69	+	4.37	0.0406	0.916
negative regulation of mitochondrion organization (GO:0010823)	51	9	2.06	+	4.37	0.00048	0.0486
cellular response to dsRNA (GO:0071359)	23	4	0.93	+	4.31	0.0194	0.644
regulation of ubiquitin protein ligase activity (GO:1904666)	23	4	0.93	+	4.31	0.0194	0.643
DNA-dependent DNA replication (GO:0006261)	110	19	4.44	+	4.28	5.89e-07	0.000124
nucleoside monophosphate biosynthetic process (GO:0009124)	29	5	1.17	+	4.27	0.00952	0.426
negative regulation of glial cell differentiation (GO:0045686)	35	6	1.41	+	4.24	0.00474	0.277
RNA phosphodiester bond hydrolysis, endonucleolytic (GO:0090502)	30	5	1.21	+	4.13	0.0108	0.467
regulation of mitotic spindle assembly (GO:1901673)	18	3	0.73	+	4.13	0.0461	0.957
negative regulation of ubiquitin-protein transferase activity (GO:0051444)	18	3	0.73	+	4.13	0.0461	0.955
mitotic G1 DNA damage checkpoint (GO:0031571)	18	3	0.73	+	4.13	0.0461	0.954
nuclear-transcribed mRNA catabolic process, deadenylation-dependent decay (GO:0000288)	36	6	1.45	+	4.13	0.00535	0.301
inactivation of MAPK activity (GO:0000188)	18	3	0.73	+	4.13	0.0461	0.953
stress fiber assembly (GO:0043149)	18	3	0.73	+	4.13	0.0461	0.952
pyrimidine ribonucleotide metabolic process (GO:0009218)	18	3	0.73	+	4.13	0.0461	0.95
pteridine-containing compound metabolic process (GO:0042558)	30	5	1.21	+	4.13	0.0108	0.465
contractile actin filament bundle assembly (GO:0030038)	18	3	0.73	+	4.13	0.0461	0.949
negative regulation of chronic inflammatory response (GO:0002677)	6	1	0.24	+	4.13	0.242	1
negative regulation of cardiac muscle hypertrophy in response to stress (GO:1903243)	6	1	0.24	+	4.13	0.242	1
regulation of endodermal cell differentiation (GO:1903224)	6	1	0.24	+	4.13	0.242	1
ammonium transmembrane transport (GO:0072488)	6	1	0.24	+	4.13	0.242	1
negative regulation of protein targeting to mitochondrion (GO:1903215)	6	1	0.24	+	4.13	0.242	1
pyrimidine ribonucleoside catabolic process (GO:0046133)	6	1	0.24	+	4.13	0.242	1
pyrimidine ribonucleoside metabolic process (GO:0046131)	6	1	0.24	+	4.13	0.242	1
DNA damage response, signal transduction by p53 class mediator resulting in transcription of p21 class mediator (GO:0006978)	12	2	0.48	+	4.13	0.101	1
negative regulation of T-helper 2 cell differentiation (GO:0045629)	6	1	0.24	+	4.13	0.242	1
CENP-A containing nucleosome assembly (GO:0034080)	6	1	0.24	+	4.13	0.242	1
N-acetylneuraminate catabolic process (GO:0019262)	6	1	0.24	+	4.13	0.242	1
subpallium development (GO:0021544)	24	4	0.97	+	4.13	0.022	0.686
negative regulation of RNA polymerase II regulatory region sequence-specific DNA binding (GO:1903026)	6	1	0.24	+	4.13	0.242	1
regulation of respiratory burst involved in inflammatory response (GO:0060264)	6	1	0.24	+	4.13	0.242	1
B cell lineage commitment (GO:0002326)	6	1	0.24	+	4.13	0.242	1
receptor recycling (GO:0001881)	12	2	0.48	+	4.13	0.101	1
positive regulation of stem cell population maintenance (GO:1902459)	12	2	0.48	+	4.13	0.101	1
negative regulation of MHC class II biosynthetic process (GO:0045347)	6	1	0.24	+	4.13	0.242	1
formation of translation preinitiation complex (GO:0001731)	12	2	0.48	+	4.13	0.101	1
modulation by organism of apoptotic process in other organism involved in symbiotic interaction (GO:0052433)	6	1	0.24	+	4.13	0.242	1
regulation of low-density lipoprotein particle receptor catabolic process (GO:0032803)	6	1	0.24	+	4.13	0.242	1
protein ufmylation (GO:0071569)	6	1	0.24	+	4.13	0.242	1
positive regulation of interleukin-18 production (GO:0032741)	6	1	0.24	+	4.13	0.242	1
cellular response to UV-C (GO:0071494)	6	1	0.24	+	4.13	0.242	1
translational readthrough (GO:0006451)	6	1	0.24	+	4.13	0.242	1
blood vessel endothelial cell proliferation involved in sprouting angiogenesis (GO:0002043)	6	1	0.24	+	4.13	0.242	1
positive regulation of glucokinase activity (GO:0033133)	6	1	0.24	+	4.13	0.242	1
positive regulation of lamellipodium morphogenesis (GO:2000394)	6	1	0.24	+	4.13	0.242	1
selenocysteine incorporation (GO:0001514)	6	1	0.24	+	4.13	0.242	1
modulation of programmed cell death in other organism involved in symbiotic interaction (GO:0052248)	6	1	0.24	+	4.13	0.242	1
negative regulation of glucocorticoid receptor signaling pathway (GO:2000323)	6	1	0.24	+	4.13	0.242	1
peptidyl-glutamine methylation (GO:0018364)	6	1	0.24	+	4.13	0.242	1
transcription by RNA polymerase III (GO:0006383)	24	4	0.97	+	4.13	0.022	0.685
protein geranylgeranylation (GO:0018344)	6	1	0.24	+	4.13	0.242	1
termination of RNA polymerase II transcription (GO:0006369)	6	1	0.24	+	4.13	0.242	1
DNA dealkylation involved in DNA repair (GO:0006307)	6	1	0.24	+	4.13	0.242	1
cellular response to nicotine (GO:0071316)	6	1	0.24	+	4.13	0.242	1
protein de-ADP-ribosylation (GO:0051725)	6	1	0.24	+	4.13	0.242	1
regulation of vesicle transport along microtubule (GO:1901608)	6	1	0.24	+	4.13	0.242	1
modulation by symbiont of host apoptotic process (GO:0052150)	6	1	0.24	+	4.13	0.242	1
modulation of apoptotic process in other organism (GO:0044532)	6	1	0.24	+	4.13	0.242	1
modulation of programmed cell death in other organism (GO:0044531)	6	1	0.24	+	4.13	0.242	1
cellular response to salt (GO:1902075)	6	1	0.24	+	4.13	0.242	1
regulation of NADP metabolic process (GO:1902031)	6	1	0.24	+	4.13	0.242	1
transcription-dependent tethering of RNA polymerase II gene DNA at nuclear periphery (GO:0000972)	6	1	0.24	+	4.13	0.242	1
'de novo' pyrimidine nucleobase biosynthetic process (GO:0006207)	6	1	0.24	+	4.13	0.242	1
negative regulation of mitophagy (GO:1901525)	6	1	0.24	+	4.13	0.242	1
stem cell fate commitment (GO:0048865)	6	1	0.24	+	4.13	0.242	1
regulation of locomotion involved in locomotory behavior (GO:0090325)	6	1	0.24	+	4.13	0.242	1
negative regulation of protein targeting to membrane (GO:0090315)	6	1	0.24	+	4.13	0.242	1
maintenance of synapse structure (GO:0099558)	12	2	0.48	+	4.13	0.101	1
negative regulation of cytokinesis (GO:0032466)	6	1	0.24	+	4.13	0.242	1
establishment of protein localization to chromatin (GO:0071169)	6	1	0.24	+	4.13	0.242	1
negative regulation of mitochondrial calcium ion concentration (GO:0051562)	6	1	0.24	+	4.13	0.242	1
regulation of mast cell proliferation (GO:0070666)	6	1	0.24	+	4.13	0.242	1
regulation of type B pancreatic cell development (GO:2000074)	6	1	0.24	+	4.13	0.242	1
fucose metabolic process (GO:0006004)	6	1	0.24	+	4.13	0.242	1
protection from non-homologous end joining at telomere (GO:0031848)	6	1	0.24	+	4.13	0.242	1
regulation of membrane repolarization during action potential (GO:0098903)	6	1	0.24	+	4.13	0.242	1
cellular sphingolipid homeostasis (GO:0090156)	6	1	0.24	+	4.13	0.242	1
negative regulation of sphingolipid biosynthetic process (GO:0090155)	6	1	0.24	+	4.13	0.242	1
smooth muscle cell proliferation (GO:0048659)	6	1	0.24	+	4.13	0.242	1
positive regulation of skeletal muscle tissue growth (GO:0048633)	6	1	0.24	+	4.13	0.242	1
maintenance of postsynaptic specialization structure (GO:0098880)	6	1	0.24	+	4.13	0.242	1
regulation of cyclic-nucleotide phosphodiesterase activity (GO:0051342)	6	1	0.24	+	4.13	0.242	1
positive regulation of transcription from RNA polymerase II promoter involved in heart development (GO:1901228)	6	1	0.24	+	4.13	0.242	1
regulation of tubulin deacetylation (GO:0090043)	12	2	0.48	+	4.13	0.101	1
negative regulation of steroid hormone biosynthetic process (GO:0090032)	6	1	0.24	+	4.13	0.242	1
negative regulation of monocyte chemotaxis (GO:0090027)	6	1	0.24	+	4.13	0.242	1
cellular response to cold (GO:0070417)	12	2	0.48	+	4.13	0.101	1
negative regulation of release of sequestered calcium ion into cytosol (GO:0051280)	12	2	0.48	+	4.13	0.101	1
positive regulation of nuclease activity (GO:0032075)	6	1	0.24	+	4.13	0.242	1
enzyme-directed rRNA pseudouridine synthesis (GO:0000455)	6	1	0.24	+	4.13	0.242	1
positive regulation of retinoic acid receptor signaling pathway (GO:0048386)	6	1	0.24	+	4.13	0.242	1
positive regulation of thymocyte apoptotic process (GO:0070245)	6	1	0.24	+	4.13	0.242	1
histone exchange (GO:0043486)	24	4	0.97	+	4.13	0.022	0.683
microtubule severing (GO:0051013)	6	1	0.24	+	4.13	0.242	1
determination of dorsal identity (GO:0048263)	6	1	0.24	+	4.13	0.242	1
alkanesulfonate transport (GO:0042918)	6	1	0.24	+	4.13	0.242	1
negative regulation of mitochondrial membrane permeability (GO:0035795)	6	1	0.24	+	4.13	0.242	1
regulation of CD8-positive, alpha-beta T cell differentiation (GO:0043376)	6	1	0.24	+	4.13	0.242	1
positive regulation of protein localization to cell cortex (GO:1904778)	6	1	0.24	+	4.13	0.242	1
negative regulation of purine nucleotide biosynthetic process (GO:1900372)	6	1	0.24	+	4.13	0.242	1
negative regulation of nucleotide biosynthetic process (GO:0030809)	6	1	0.24	+	4.13	0.242	1
snRNA transcription (GO:0009301)	12	2	0.48	+	4.13	0.101	1
osteoclast development (GO:0036035)	6	1	0.24	+	4.13	0.242	1
thelarche (GO:0042695)	6	1	0.24	+	4.13	0.242	1
positive regulation of microtubule binding (GO:1904528)	6	1	0.24	+	4.13	0.242	1
motor learning (GO:0061743)	6	1	0.24	+	4.13	0.242	1
nuclear-transcribed mRNA catabolic process, deadenylation-independent decay (GO:0031086)	6	1	0.24	+	4.13	0.242	1
ribonucleoside monophosphate biosynthetic process (GO:0009156)	24	4	0.97	+	4.13	0.022	0.682
purine nucleoside triphosphate catabolic process (GO:0009146)	6	1	0.24	+	4.13	0.242	1
regulation of hemoglobin biosynthetic process (GO:0046984)	6	1	0.24	+	4.13	0.242	1
fatty-acyl-CoA biosynthetic process (GO:0046949)	6	1	0.24	+	4.13	0.242	1
free ubiquitin chain polymerization (GO:0010994)	6	1	0.24	+	4.13	0.242	1
amylin receptor signaling pathway (GO:0097647)	6	1	0.24	+	4.13	0.242	1
negative regulation of glial cell migration (GO:1903976)	6	1	0.24	+	4.13	0.242	1
CENP-A containing chromatin organization (GO:0061641)	6	1	0.24	+	4.13	0.242	1
bundle of His cell-Purkinje myocyte adhesion involved in cell communication (GO:0086073)	6	1	0.24	+	4.13	0.242	1
taurine transport (GO:0015734)	6	1	0.24	+	4.13	0.242	1
negative regulation of protein export from nucleus (GO:0046826)	6	1	0.24	+	4.13	0.242	1
peptidyl-arginine N-methylation (GO:0035246)	6	1	0.24	+	4.13	0.242	1
positive regulation of plasminogen activation (GO:0010756)	6	1	0.24	+	4.13	0.242	1
positive regulation of transcription from RNA polymerase II promoter in response to hypoxia (GO:0061419)	6	1	0.24	+	4.13	0.242	1
positive regulation of I-kappaB phosphorylation (GO:1903721)	6	1	0.24	+	4.13	0.242	1
embryonic heart tube left/right pattern formation (GO:0060971)	6	1	0.24	+	4.13	0.242	1
positive regulation of microglial cell migration (GO:1904141)	6	1	0.24	+	4.13	0.242	1
cardiac muscle cell apoptotic process (GO:0010659)	6	1	0.24	+	4.13	0.242	1
striated muscle cell apoptotic process (GO:0010658)	6	1	0.24	+	4.13	0.242	1
neutrophil differentiation (GO:0030223)	6	1	0.24	+	4.13	0.242	1
establishment of blood-brain barrier (GO:0060856)	12	2	0.48	+	4.13	0.101	1
arterial endothelial cell differentiation (GO:0060842)	6	1	0.24	+	4.13	0.242	1
regulation of phosphatidylinositol biosynthetic process (GO:0010511)	6	1	0.24	+	4.13	0.242	1
noradrenergic neuron differentiation (GO:0003357)	6	1	0.24	+	4.13	0.242	1
S-adenosylhomocysteine metabolic process (GO:0046498)	6	1	0.24	+	4.13	0.242	1
glycosylceramide catabolic process (GO:0046477)	6	1	0.24	+	4.13	0.242	1
mammary gland branching involved in thelarche (GO:0060744)	6	1	0.24	+	4.13	0.242	1
protein maturation by protein folding (GO:0022417)	6	1	0.24	+	4.13	0.242	1
epithelial-mesenchymal cell signaling (GO:0060684)	6	1	0.24	+	4.13	0.242	1
negative regulation of muscle adaptation (GO:0014745)	12	2	0.48	+	4.13	0.101	1
response to granulocyte macrophage colony-stimulating factor (GO:0097012)	12	2	0.48	+	4.13	0.101	1
positive regulation of myeloid dendritic cell cytokine production (GO:0002735)	6	1	0.24	+	4.13	0.242	1
regulation of myeloid dendritic cell cytokine production (GO:0002733)	6	1	0.24	+	4.13	0.242	1
pyrimidine nucleotide metabolic process (GO:0006220)	31	5	1.25	+	3.99	0.0121	0.508
rRNA modification (GO:0000154)	31	5	1.25	+	3.99	0.0121	0.507
tRNA methylation (GO:0030488)	31	5	1.25	+	3.99	0.0121	0.506
DNA-templated transcription, initiation (GO:0006352)	56	9	2.26	+	3.98	0.000874	0.0793
endosome organization (GO:0007032)	50	8	2.02	+	3.96	0.00172	0.132
negative regulation of viral transcription (GO:0032897)	25	4	1.01	+	3.96	0.0248	0.733
transcription elongation from RNA polymerase II promoter (GO:0006368)	25	4	1.01	+	3.96	0.0248	0.732
negative regulation of viral life cycle (GO:1903901)	25	4	1.01	+	3.96	0.0248	0.73
negative regulation of telomere maintenance via telomere lengthening (GO:1904357)	25	4	1.01	+	3.96	0.0248	0.729
snRNA processing (GO:0016180)	25	4	1.01	+	3.96	0.0248	0.728
regulation of establishment of protein localization to mitochondrion (GO:1903747)	25	4	1.01	+	3.96	0.0248	0.726
pyrimidine-containing compound biosynthetic process (GO:0072528)	25	4	1.01	+	3.96	0.0248	0.725
peptide metabolic process (GO:0006518)	444	71	17.93	+	3.96	1.1e-20	5.76e-18
amide biosynthetic process (GO:0043604)	424	67	17.12	+	3.91	2.45e-19	1.14e-16
polyamine metabolic process (GO:0006595)	19	3	0.77	+	3.91	0.0518	1
G1 DNA damage checkpoint (GO:0044783)	19	3	0.77	+	3.91	0.0518	1
glandular epithelial cell development (GO:0002068)	19	3	0.77	+	3.91	0.0518	1
regulation of fibroblast apoptotic process (GO:2000269)	19	3	0.77	+	3.91	0.0518	1
protein localization to mitochondrion (GO:0070585)	76	12	3.07	+	3.91	0.000148	0.0183
macrophage migration (GO:1905517)	19	3	0.77	+	3.91	0.0518	1
regulation of release of sequestered calcium ion into cytosol by sarcoplasmic reticulum (GO:0010880)	19	3	0.77	+	3.91	0.0518	1
rRNA catabolic process (GO:0016075)	19	3	0.77	+	3.91	0.0518	1
pyrimidine-containing compound catabolic process (GO:0072529)	19	3	0.77	+	3.91	0.0518	1
establishment of protein localization to mitochondrion (GO:0072655)	70	11	2.83	+	3.89	0.000287	0.0324
negative regulation of gliogenesis (GO:0014014)	51	8	2.06	+	3.88	0.00192	0.142
ncRNA transcription (GO:0098781)	32	5	1.29	+	3.87	0.0136	0.541
RNA processing (GO:0006396)	767	119	30.98	+	3.84	3.06e-33	3.71e-30
signal transduction involved in mitotic cell cycle checkpoint (GO:0072413)	13	2	0.53	+	3.81	0.113	1
signal transduction involved in mitotic DNA integrity checkpoint (GO:1902403)	13	2	0.53	+	3.81	0.113	1
signal transduction involved in mitotic DNA damage checkpoint (GO:1902402)	13	2	0.53	+	3.81	0.113	1
negative regulation of telomerase activity (GO:0051974)	13	2	0.53	+	3.81	0.113	1
C-terminal protein amino acid modification (GO:0018410)	13	2	0.53	+	3.81	0.113	1
development of secondary sexual characteristics (GO:0045136)	13	2	0.53	+	3.81	0.113	1
positive regulation of intracellular estrogen receptor signaling pathway (GO:0033148)	13	2	0.53	+	3.81	0.113	1
cellular response to lithium ion (GO:0071285)	13	2	0.53	+	3.81	0.113	1
protein oxidation (GO:0018158)	13	2	0.53	+	3.81	0.113	1
positive regulation of release of cytochrome c from mitochondria (GO:0090200)	26	4	1.05	+	3.81	0.0277	0.77
guanosine-containing compound biosynthetic process (GO:1901070)	13	2	0.53	+	3.81	0.113	1
positive regulation of protein localization to chromosome, telomeric region (GO:1904816)	13	2	0.53	+	3.81	0.113	1
deoxyribonucleotide biosynthetic process (GO:0009263)	13	2	0.53	+	3.81	0.113	1
pyrimidine nucleoside triphosphate biosynthetic process (GO:0009148)	13	2	0.53	+	3.81	0.113	1
vitamin biosynthetic process (GO:0009110)	13	2	0.53	+	3.81	0.113	1
positive regulation of membrane depolarization (GO:1904181)	13	2	0.53	+	3.81	0.113	1
type B pancreatic cell development (GO:0003323)	13	2	0.53	+	3.81	0.113	1
lung secretory cell differentiation (GO:0061140)	13	2	0.53	+	3.81	0.113	1
negative regulation of cell growth involved in cardiac muscle cell development (GO:0061052)	13	2	0.53	+	3.81	0.113	1
mRNA splicing, via spliceosome (GO:0000398)	211	32	8.52	+	3.76	1.63e-09	4.36e-07
RNA splicing, via transesterification reactions with bulged adenosine as nucleophile (GO:0000377)	211	32	8.52	+	3.76	1.63e-09	4.29e-07
RNA splicing, via transesterification reactions (GO:0000375)	211	32	8.52	+	3.76	1.63e-09	4.22e-07
histone H4 acetylation (GO:0043967)	53	8	2.14	+	3.74	0.00238	0.169
mitotic G1/S transition checkpoint (GO:0044819)	20	3	0.81	+	3.71	0.058	1
regulation of mitochondrial outer membrane permeabilization involved in apoptotic signaling pathway (GO:1901028)	20	3	0.81	+	3.71	0.058	1
alternative mRNA splicing, via spliceosome (GO:0000380)	20	3	0.81	+	3.71	0.058	1
tetrahydrofolate metabolic process (GO:0046653)	20	3	0.81	+	3.71	0.058	1
regulation of DNA-dependent DNA replication (GO:0090329)	47	7	1.9	+	3.69	0.00469	0.275
mRNA splice site selection (GO:0006376)	27	4	1.09	+	3.67	0.0309	0.803
actin nucleation (GO:0045010)	27	4	1.09	+	3.67	0.0309	0.801
regulation of mitochondrial translation (GO:0070129)	27	4	1.09	+	3.67	0.0309	0.8
regulation of autophagy of mitochondrion (GO:1903146)	34	5	1.37	+	3.64	0.0168	0.589
negative regulation of telomere maintenance (GO:0032205)	34	5	1.37	+	3.64	0.0168	0.587
regulation of transcription initiation from RNA polymerase II promoter (GO:0060260)	41	6	1.66	+	3.62	0.0093	0.422
DNA replication (GO:0006260)	172	25	6.95	+	3.6	2.03e-07	4.44e-05
tRNA processing (GO:0008033)	118	17	4.77	+	3.57	1.95e-05	0.00338
regulation of DNA damage response, signal transduction by p53 class mediator (GO:0043516)	35	5	1.41	+	3.54	0.0186	0.631
response to lithium ion (GO:0010226)	14	2	0.57	+	3.54	0.126	1
forebrain dorsal/ventral pattern formation (GO:0021798)	7	1	0.28	+	3.54	0.272	1
nuclear pore organization (GO:0006999)	14	2	0.57	+	3.54	0.126	1
positive regulation of toll-like receptor 3 signaling pathway (GO:0034141)	7	1	0.28	+	3.54	0.272	1
negative regulation of monocyte differentiation (GO:0045656)	7	1	0.28	+	3.54	0.272	1
regulation of melanocyte differentiation (GO:0045634)	7	1	0.28	+	3.54	0.272	1
regulation of atrial cardiac muscle cell membrane repolarization (GO:0060372)	7	1	0.28	+	3.54	0.272	1
clathrin coat disassembly (GO:0072318)	7	1	0.28	+	3.54	0.272	1
negative regulation of type I interferon-mediated signaling pathway (GO:0060339)	14	2	0.57	+	3.54	0.126	1
negative regulation of regulatory T cell differentiation (GO:0045590)	7	1	0.28	+	3.54	0.272	1
protein localization to membrane raft (GO:1903044)	7	1	0.28	+	3.54	0.272	1
spinal cord association neuron differentiation (GO:0021527)	14	2	0.57	+	3.54	0.126	1
negative regulation of respiratory burst (GO:0060268)	7	1	0.28	+	3.54	0.272	1
estrogen biosynthetic process (GO:0006703)	7	1	0.28	+	3.54	0.272	1
SMAD protein complex assembly (GO:0007183)	7	1	0.28	+	3.54	0.272	1
release of cytochrome c from mitochondria (GO:0001836)	21	3	0.85	+	3.54	0.0644	1
ribonucleoprotein complex disassembly (GO:0032988)	7	1	0.28	+	3.54	0.272	1
maintenance of protein location in extracellular region (GO:0071694)	7	1	0.28	+	3.54	0.272	1
mitotic cytokinetic process (GO:1902410)	21	3	0.85	+	3.54	0.0644	1
negative regulation of mononuclear cell migration (GO:0071676)	7	1	0.28	+	3.54	0.272	1
regulation of MHC class I biosynthetic process (GO:0045343)	7	1	0.28	+	3.54	0.272	1
outer mitochondrial membrane organization (GO:0007008)	7	1	0.28	+	3.54	0.272	1
protein localization to bicellular tight junction (GO:1902396)	7	1	0.28	+	3.54	0.272	1
telomere maintenance via telomerase (GO:0007004)	14	2	0.57	+	3.54	0.126	1
polyamine biosynthetic process (GO:0006596)	14	2	0.57	+	3.54	0.126	1
L-phenylalanine catabolic process (GO:0006559)	7	1	0.28	+	3.54	0.272	1
positive regulation of attachment of spindle microtubules to kinetochore (GO:0051987)	7	1	0.28	+	3.54	0.272	1
aspartate metabolic process (GO:0006531)	7	1	0.28	+	3.54	0.272	1
positive regulation of cellular respiration (GO:1901857)	7	1	0.28	+	3.54	0.272	1
regulation of mitochondrial depolarization (GO:0051900)	21	3	0.85	+	3.54	0.0644	1
ribosome disassembly (GO:0032790)	7	1	0.28	+	3.54	0.272	1
erythrose 4-phosphate/phosphoenolpyruvate family amino acid catabolic process (GO:1902222)	7	1	0.28	+	3.54	0.272	1
negative regulation of receptor internalization (GO:0002091)	14	2	0.57	+	3.54	0.126	1
establishment of endothelial blood-brain barrier (GO:0014045)	7	1	0.28	+	3.54	0.272	1
regulation of neuron maturation (GO:0014041)	14	2	0.57	+	3.54	0.126	1
intermediate filament bundle assembly (GO:0045110)	7	1	0.28	+	3.54	0.272	1
antral ovarian follicle growth (GO:0001547)	7	1	0.28	+	3.54	0.272	1
interleukin-17 production (GO:0032620)	7	1	0.28	+	3.54	0.272	1
regulation of mitochondrial membrane permeability involved in apoptotic process (GO:1902108)	21	3	0.85	+	3.54	0.0644	1
positive thymic T cell selection (GO:0045059)	14	2	0.57	+	3.54	0.126	1
myeloid cell apoptotic process (GO:0033028)	7	1	0.28	+	3.54	0.272	1
stress-induced premature senescence (GO:0090400)	7	1	0.28	+	3.54	0.272	1
regulation of male germ cell proliferation (GO:2000254)	7	1	0.28	+	3.54	0.272	1
mismatch repair (GO:0006298)	21	3	0.85	+	3.54	0.0644	1
regulation of anoikis (GO:2000209)	21	3	0.85	+	3.54	0.0644	1
regulation of microvillus length (GO:0032532)	7	1	0.28	+	3.54	0.272	1
RNA-dependent DNA biosynthetic process (GO:0006278)	14	2	0.57	+	3.54	0.126	1
endosome to lysosome transport via multivesicular body sorting pathway (GO:0032510)	7	1	0.28	+	3.54	0.272	1
cellular response to vitamin (GO:0071295)	7	1	0.28	+	3.54	0.272	1
mitochondrial RNA processing (GO:0000963)	14	2	0.57	+	3.54	0.126	1
regulation of germ cell proliferation (GO:1905936)	7	1	0.28	+	3.54	0.272	1
positive regulation of cell proliferation involved in heart morphogenesis (GO:2000138)	7	1	0.28	+	3.54	0.272	1
polar body extrusion after meiotic divisions (GO:0040038)	7	1	0.28	+	3.54	0.272	1
AMP biosynthetic process (GO:0006167)	7	1	0.28	+	3.54	0.272	1
histone H4-K16 acetylation (GO:0043984)	14	2	0.57	+	3.54	0.126	1
malate metabolic process (GO:0006108)	7	1	0.28	+	3.54	0.272	1
regulation of mitotic cell cycle spindle assembly checkpoint (GO:0090266)	14	2	0.57	+	3.54	0.126	1
negative regulation of histone H4 acetylation (GO:0090241)	7	1	0.28	+	3.54	0.272	1
regulation of stem cell division (GO:2000035)	14	2	0.57	+	3.54	0.126	1
positive regulation of pigment cell differentiation (GO:0050942)	7	1	0.28	+	3.54	0.272	1
positive regulation of miRNA mediated inhibition of translation (GO:1905618)	7	1	0.28	+	3.54	0.272	1
regulation of miRNA mediated inhibition of translation (GO:1905616)	7	1	0.28	+	3.54	0.272	1
regulation of timing of cell differentiation (GO:0048505)	14	2	0.57	+	3.54	0.126	1
positive regulation of sequestering of calcium ion (GO:0051284)	14	2	0.57	+	3.54	0.126	1
inhibition of cysteine-type endopeptidase activity involved in apoptotic process (GO:1990001)	7	1	0.28	+	3.54	0.272	1
necroptotic process (GO:0070266)	21	3	0.85	+	3.54	0.0644	1
regulation of cytochrome-c oxidase activity (GO:1904959)	7	1	0.28	+	3.54	0.272	1
nuclear envelope reassembly (GO:0031468)	7	1	0.28	+	3.54	0.272	1
negative regulation of lipoprotein lipase activity (GO:0051005)	7	1	0.28	+	3.54	0.272	1
regulation of telomerase RNA localization to Cajal body (GO:1904872)	7	1	0.28	+	3.54	0.272	1
determination of dorsal/ventral asymmetry (GO:0048262)	7	1	0.28	+	3.54	0.272	1
COPII vesicle coating (GO:0048208)	7	1	0.28	+	3.54	0.272	1
vesicle targeting, rough ER to cis-Golgi (GO:0048207)	7	1	0.28	+	3.54	0.272	1
regulation of glutamate receptor signaling pathway (GO:1900449)	7	1	0.28	+	3.54	0.272	1
platelet-derived growth factor receptor-beta signaling pathway (GO:0035791)	7	1	0.28	+	3.54	0.272	1
intraciliary transport involved in cilium assembly (GO:0035735)	7	1	0.28	+	3.54	0.272	1
hematopoietic stem cell migration (GO:0035701)	7	1	0.28	+	3.54	0.272	1
positive regulation of core promoter binding (GO:1904798)	7	1	0.28	+	3.54	0.272	1
positive regulation of protein localization to centrosome (GO:1904781)	7	1	0.28	+	3.54	0.272	1
cellular response to macrophage colony-stimulating factor stimulus (GO:0036006)	7	1	0.28	+	3.54	0.272	1
response to macrophage colony-stimulating factor (GO:0036005)	7	1	0.28	+	3.54	0.272	1
citrulline metabolic process (GO:0000052)	7	1	0.28	+	3.54	0.272	1
regulation of vascular associated smooth muscle cell differentiation (GO:1905063)	14	2	0.57	+	3.54	0.126	1
calcium-independent cell-cell adhesion via plasma membrane cell-adhesion molecules (GO:0016338)	7	1	0.28	+	3.54	0.272	1
response to hyperoxia (GO:0055093)	7	1	0.28	+	3.54	0.272	1
deoxyribonucleoside monophosphate metabolic process (GO:0009162)	7	1	0.28	+	3.54	0.272	1
calcitonin family receptor signaling pathway (GO:0097646)	7	1	0.28	+	3.54	0.272	1
negative regulation of tubulin deacetylation (GO:1904428)	7	1	0.28	+	3.54	0.272	1
gap junction assembly (GO:0016264)	7	1	0.28	+	3.54	0.272	1
cardiac muscle cell-cardiac muscle cell adhesion (GO:0086042)	7	1	0.28	+	3.54	0.272	1
ribonucleoside catabolic process (GO:0042454)	14	2	0.57	+	3.54	0.126	1
telomere maintenance via telomere lengthening (GO:0010833)	21	3	0.85	+	3.54	0.0644	1
negative regulation of p38MAPK cascade (GO:1903753)	7	1	0.28	+	3.54	0.272	1
RIG-I signaling pathway (GO:0039529)	7	1	0.28	+	3.54	0.272	1
regulation of I-kappaB phosphorylation (GO:1903719)	7	1	0.28	+	3.54	0.272	1
intestinal cholesterol absorption (GO:0030299)	7	1	0.28	+	3.54	0.272	1
regulation of microglial cell migration (GO:1904139)	7	1	0.28	+	3.54	0.272	1
muscle cell apoptotic process (GO:0010657)	7	1	0.28	+	3.54	0.272	1
negative regulation of Schwann cell proliferation (GO:0010626)	7	1	0.28	+	3.54	0.272	1
negative regulation of cardiac muscle adaptation (GO:0010616)	7	1	0.28	+	3.54	0.272	1
axonal transport of mitochondrion (GO:0019896)	14	2	0.57	+	3.54	0.126	1
L-ascorbic acid metabolic process (GO:0019852)	7	1	0.28	+	3.54	0.272	1
cardiac neural crest cell development involved in outflow tract morphogenesis (GO:0061309)	7	1	0.28	+	3.54	0.272	1
endothelial cell fate commitment (GO:0060839)	7	1	0.28	+	3.54	0.272	1
S-adenosylmethionine metabolic process (GO:0046500)	14	2	0.57	+	3.54	0.126	1
regulation of DNA-dependent DNA replication initiation (GO:0030174)	7	1	0.28	+	3.54	0.272	1
activation of cysteine-type endopeptidase activity (GO:0097202)	14	2	0.57	+	3.54	0.126	1
regulation of activation of Janus kinase activity (GO:0010533)	7	1	0.28	+	3.54	0.272	1
spermine metabolic process (GO:0008215)	7	1	0.28	+	3.54	0.272	1
regulation of mitotic spindle checkpoint (GO:1903504)	14	2	0.57	+	3.54	0.126	1
negative regulation of epithelial cell proliferation involved in prostate gland development (GO:0060770)	7	1	0.28	+	3.54	0.272	1
keratinocyte development (GO:0003334)	14	2	0.57	+	3.54	0.126	1
muscle atrophy (GO:0014889)	7	1	0.28	+	3.54	0.272	1
intercellular transport (GO:0010496)	7	1	0.28	+	3.54	0.272	1
positive regulation of cell fate commitment (GO:0010455)	7	1	0.28	+	3.54	0.272	1
positive regulation of striated muscle contraction (GO:0045989)	14	2	0.57	+	3.54	0.126	1
release of sequestered calcium ion into cytosol by sarcoplasmic reticulum (GO:0014808)	7	1	0.28	+	3.54	0.272	1
regulation of somitogenesis (GO:0014807)	7	1	0.28	+	3.54	0.272	1
pulmonary artery morphogenesis (GO:0061156)	7	1	0.28	+	3.54	0.272	1
P-body assembly (GO:0033962)	14	2	0.57	+	3.54	0.126	1
negative regulation of complement activation (GO:0045916)	7	1	0.28	+	3.54	0.272	1
commitment of neuronal cell to specific neuron type in forebrain (GO:0021902)	7	1	0.28	+	3.54	0.272	1
regulation of transcription from RNA polymerase II promoter involved in myocardial precursor cell differentiation (GO:0003256)	7	1	0.28	+	3.54	0.272	1
negative regulation of autophagosome assembly (GO:1902902)	14	2	0.57	+	3.54	0.126	1
diol biosynthetic process (GO:0034312)	21	3	0.85	+	3.54	0.0644	1
positive regulation of protein folding (GO:1903334)	7	1	0.28	+	3.54	0.272	1
peptidyl-proline hydroxylation (GO:0019511)	14	2	0.57	+	3.54	0.126	1
positive regulation of hexokinase activity (GO:1903301)	7	1	0.28	+	3.54	0.272	1
DNA demethylation (GO:0080111)	14	2	0.57	+	3.54	0.126	1
type II pneumocyte differentiation (GO:0060510)	7	1	0.28	+	3.54	0.272	1
type I pneumocyte differentiation (GO:0060509)	7	1	0.28	+	3.54	0.272	1
mRNA transport (GO:0051028)	106	15	4.28	+	3.5	7.1e-05	0.00958
regulation of signal transduction by p53 class mediator (GO:1901796)	71	10	2.87	+	3.49	0.00115	0.0983
mRNA catabolic process (GO:0006402)	121	17	4.89	+	3.48	2.6e-05	0.00423
positive regulation of RNA splicing (GO:0033120)	50	7	2.02	+	3.47	0.00633	0.33
mitochondrial translation (GO:0032543)	50	7	2.02	+	3.47	0.00633	0.329
regulation of viral transcription (GO:0046782)	43	6	1.74	+	3.46	0.0113	0.487
positive regulation of transcription initiation from RNA polymerase II promoter (GO:0060261)	36	5	1.45	+	3.44	0.0206	0.653
water-soluble vitamin metabolic process (GO:0006767)	29	4	1.17	+	3.42	0.0378	0.872
regulation of histone deacetylation (GO:0031063)	29	4	1.17	+	3.42	0.0378	0.871
epithelial cell apoptotic process (GO:1904019)	29	4	1.17	+	3.42	0.0378	0.87
heme biosynthetic process (GO:0006783)	22	3	0.89	+	3.38	0.0712	1
purine nucleobase metabolic process (GO:0006144)	22	3	0.89	+	3.38	0.0712	1
negative regulation of T cell receptor signaling pathway (GO:0050860)	22	3	0.89	+	3.38	0.0712	1
cytoplasmic sequestering of protein (GO:0051220)	22	3	0.89	+	3.38	0.0712	1
membrane raft organization (GO:0031579)	22	3	0.89	+	3.38	0.0712	1
RNA splicing (GO:0008380)	330	45	13.33	+	3.38	2e-11	5.84e-09
nuclear-transcribed mRNA catabolic process (GO:0000956)	96	13	3.88	+	3.35	0.000312	0.0342
cortical actin cytoskeleton organization (GO:0030866)	37	5	1.49	+	3.35	0.0226	0.688
nucleotide-excision repair (GO:0006289)	52	7	2.1	+	3.33	0.00765	0.369
RNA methylation (GO:0001510)	67	9	2.71	+	3.33	0.00267	0.183
glial cell fate commitment (GO:0021781)	15	2	0.61	+	3.3	0.14	1
heart trabecula formation (GO:0060347)	15	2	0.61	+	3.3	0.14	1
positive regulation of regulatory T cell differentiation (GO:0045591)	15	2	0.61	+	3.3	0.14	1
tRNA modification (GO:0006400)	75	10	3.03	+	3.3	0.00166	0.129
positive regulation of viral release from host cell (GO:1902188)	15	2	0.61	+	3.3	0.14	1
positive regulation of T cell apoptotic process (GO:0070234)	15	2	0.61	+	3.3	0.14	1
regulation of protein localization to chromosome, telomeric region (GO:1904814)	15	2	0.61	+	3.3	0.14	1
spliceosomal complex assembly (GO:0000245)	45	6	1.82	+	3.3	0.0137	0.545
neurotrophin TRK receptor signaling pathway (GO:0048011)	15	2	0.61	+	3.3	0.14	1
deoxyribonucleotide metabolic process (GO:0009262)	30	4	1.21	+	3.3	0.0416	0.927
regulation of intestinal absorption (GO:1904478)	15	2	0.61	+	3.3	0.14	1
positive regulation of mitochondrial membrane potential (GO:0010918)	15	2	0.61	+	3.3	0.14	1
positive regulation of cell-substrate junction organization (GO:0150117)	30	4	1.21	+	3.3	0.0416	0.925
regulation of complement activation (GO:0030449)	15	2	0.61	+	3.3	0.14	1
viral budding (GO:0046755)	15	2	0.61	+	3.3	0.14	1
natural killer cell mediated cytotoxicity (GO:0042267)	15	2	0.61	+	3.3	0.14	1
negative regulation of calcium ion transport into cytosol (GO:0010523)	15	2	0.61	+	3.3	0.14	1
negative regulation of ATP metabolic process (GO:1903579)	30	4	1.21	+	3.3	0.0416	0.924
olfactory bulb interneuron differentiation (GO:0021889)	15	2	0.61	+	3.3	0.14	1
negative regulation of cell-matrix adhesion (GO:0001953)	38	5	1.53	+	3.26	0.0248	0.725
peptidyl-proline modification (GO:0018208)	38	5	1.53	+	3.26	0.0248	0.723
RNA localization (GO:0006403)	168	22	6.78	+	3.24	4.99e-06	0.000916
tRNA metabolic process (GO:0006399)	168	22	6.78	+	3.24	4.99e-06	0.000906
negative regulation of stem cell differentiation (GO:2000737)	23	3	0.93	+	3.23	0.0782	1
glycosyl compound biosynthetic process (GO:1901659)	23	3	0.93	+	3.23	0.0782	1
positive regulation of transcription from RNA polymerase II promoter in response to stress (GO:0036003)	23	3	0.93	+	3.23	0.0782	1
mitochondrial genome maintenance (GO:0000002)	23	3	0.93	+	3.23	0.0782	1
ATP-dependent chromatin remodeling (GO:0043044)	46	6	1.86	+	3.23	0.015	0.555
regulation of mitochondrial membrane permeability (GO:0046902)	54	7	2.18	+	3.21	0.00915	0.419
regulation of substrate adhesion-dependent cell spreading (GO:1900024)	54	7	2.18	+	3.21	0.00915	0.417
RNA catabolic process (GO:0006401)	147	19	5.94	+	3.2	2.55e-05	0.00428
RNA transport (GO:0050658)	147	19	5.94	+	3.2	2.55e-05	0.00424
nucleic acid transport (GO:0050657)	147	19	5.94	+	3.2	2.55e-05	0.00419
negative regulation of cell junction assembly (GO:1901889)	31	4	1.25	+	3.2	0.0455	0.951
negative regulation of extrinsic apoptotic signaling pathway via death domain receptors (GO:1902042)	31	4	1.25	+	3.2	0.0455	0.949
chaperone cofactor-dependent protein refolding (GO:0051085)	31	4	1.25	+	3.2	0.0455	0.948
cortical cytoskeleton organization (GO:0030865)	62	8	2.5	+	3.2	0.00563	0.305
RNA metabolic process (GO:0016070)	1203	155	48.58	+	3.19	6.22e-35	9.82e-32
signal transduction in absence of ligand (GO:0038034)	39	5	1.58	+	3.17	0.0271	0.761
nucleic acid phosphodiester bond hydrolysis (GO:0090305)	117	15	4.73	+	3.17	0.000191	0.0227
extrinsic apoptotic signaling pathway in absence of ligand (GO:0097192)	39	5	1.58	+	3.17	0.0271	0.76
RNA modification (GO:0009451)	141	18	5.69	+	3.16	4.78e-05	0.00667
intraciliary transport (GO:0042073)	47	6	1.9	+	3.16	0.0164	0.578
establishment of RNA localization (GO:0051236)	149	19	6.02	+	3.16	3.02e-05	0.00476
mitochondrial gene expression (GO:0140053)	79	10	3.19	+	3.13	0.00235	0.169
mRNA metabolic process (GO:0016071)	535	67	21.61	+	3.1	8.81e-15	3.31e-12
pyrimidine nucleoside catabolic process (GO:0046135)	8	1	0.32	+	3.1	0.3	1
purine ribonucleoside catabolic process (GO:0046130)	8	1	0.32	+	3.1	0.3	1
inflammatory cell apoptotic process (GO:0006925)	8	1	0.32	+	3.1	0.3	1
regulation of monocyte differentiation (GO:0045655)	16	2	0.65	+	3.1	0.153	1
positive regulation of T-helper 1 cell differentiation (GO:0045627)	8	1	0.32	+	3.1	0.3	1
central nervous system maturation (GO:0021626)	8	1	0.32	+	3.1	0.3	1
vesicle uncoating (GO:0072319)	8	1	0.32	+	3.1	0.3	1
glomerular epithelial cell development (GO:0072310)	8	1	0.32	+	3.1	0.3	1
regulation of ryanodine-sensitive calcium-release channel activity (GO:0060314)	16	2	0.65	+	3.1	0.153	1
regulation of cysteine-type endopeptidase activity involved in apoptotic signaling pathway (GO:2001267)	16	2	0.65	+	3.1	0.153	1
negative regulation of cytoplasmic translation (GO:2000766)	8	1	0.32	+	3.1	0.3	1
detection of cell density (GO:0060245)	8	1	0.32	+	3.1	0.3	1
contact inhibition (GO:0060242)	8	1	0.32	+	3.1	0.3	1
negative regulation of cardiac muscle cell differentiation (GO:2000726)	8	1	0.32	+	3.1	0.3	1
myeloid progenitor cell differentiation (GO:0002318)	8	1	0.32	+	3.1	0.3	1
natural killer cell mediated immunity (GO:0002228)	16	2	0.65	+	3.1	0.153	1
modulation by virus of host cellular process (GO:0019054)	8	1	0.32	+	3.1	0.3	1
relaxation of vascular associated smooth muscle (GO:0060087)	8	1	0.32	+	3.1	0.3	1
regulation of CD8-positive, alpha-beta T cell proliferation (GO:2000564)	8	1	0.32	+	3.1	0.3	1
plasma membrane raft organization (GO:0044857)	8	1	0.32	+	3.1	0.3	1
glomerular visceral epithelial cell development (GO:0072015)	8	1	0.32	+	3.1	0.3	1
response to vitamin D (GO:0033280)	8	1	0.32	+	3.1	0.3	1
positive regulation of protein sumoylation (GO:0033235)	16	2	0.65	+	3.1	0.153	1
regulation of glycogen (starch) synthase activity (GO:2000465)	8	1	0.32	+	3.1	0.3	1
DNA methylation on cytosine (GO:0032776)	8	1	0.32	+	3.1	0.3	1
p38MAPK cascade (GO:0038066)	8	1	0.32	+	3.1	0.3	1
cellular response to fluid shear stress (GO:0071498)	16	2	0.65	+	3.1	0.153	1
neural crest formation (GO:0014029)	8	1	0.32	+	3.1	0.3	1
negative regulation of signal transduction by p53 class mediator (GO:1901797)	32	4	1.29	+	3.1	0.0497	1
negative regulation of viral release from host cell (GO:1902187)	16	2	0.65	+	3.1	0.153	1
regulation of interleukin-18 production (GO:0032661)	8	1	0.32	+	3.1	0.3	1
DNA-templated transcription, elongation (GO:0006354)	32	4	1.29	+	3.1	0.0497	1
chromatin silencing at telomere (GO:0006348)	8	1	0.32	+	3.1	0.3	1
cellular response to caffeine (GO:0071313)	8	1	0.32	+	3.1	0.3	1
protein insertion into mitochondrial inner membrane (GO:0045039)	8	1	0.32	+	3.1	0.3	1
response to L-glutamate (GO:1902065)	8	1	0.32	+	3.1	0.3	1
DNA replication initiation (GO:0006270)	24	3	0.97	+	3.1	0.0856	1
cellular response to arsenic-containing substance (GO:0071243)	16	2	0.65	+	3.1	0.153	1
changes to DNA methylation involved in embryo development (GO:1901538)	8	1	0.32	+	3.1	0.3	1
IMP biosynthetic process (GO:0006188)	8	1	0.32	+	3.1	0.3	1
regulation of development, heterochronic (GO:0040034)	16	2	0.65	+	3.1	0.153	1
purine nucleoside catabolic process (GO:0006152)	8	1	0.32	+	3.1	0.3	1
positive regulation by host of viral transcription (GO:0043923)	16	2	0.65	+	3.1	0.153	1
regulation of spindle checkpoint (GO:0090231)	16	2	0.65	+	3.1	0.153	1
positive regulation of Wnt signaling pathway, planar cell polarity pathway (GO:2000096)	8	1	0.32	+	3.1	0.3	1
centromeric sister chromatid cohesion (GO:0070601)	8	1	0.32	+	3.1	0.3	1
regulation of intracellular cholesterol transport (GO:0032383)	8	1	0.32	+	3.1	0.3	1
regulation of intracellular sterol transport (GO:0032380)	8	1	0.32	+	3.1	0.3	1
regulation of intracellular lipid transport (GO:0032377)	8	1	0.32	+	3.1	0.3	1
positive regulation of cell-cell adhesion mediated by cadherin (GO:2000049)	8	1	0.32	+	3.1	0.3	1
hyaloid vascular plexus regression (GO:1990384)	8	1	0.32	+	3.1	0.3	1
galactose metabolic process (GO:0006012)	8	1	0.32	+	3.1	0.3	1
negative regulation of membrane permeability (GO:1905709)	8	1	0.32	+	3.1	0.3	1
regulation of skeletal muscle tissue growth (GO:0048631)	8	1	0.32	+	3.1	0.3	1
neurotransmitter receptor transport, endosome to postsynaptic membrane (GO:0098887)	8	1	0.32	+	3.1	0.3	1
positive regulation of calcium ion import across plasma membrane (GO:1905665)	8	1	0.32	+	3.1	0.3	1
negative regulation of inclusion body assembly (GO:0090084)	8	1	0.32	+	3.1	0.3	1
rRNA base methylation (GO:0070475)	8	1	0.32	+	3.1	0.3	1
nucleotide-binding oligomerization domain containing 2 signaling pathway (GO:0070431)	8	1	0.32	+	3.1	0.3	1
nucleotide-binding oligomerization domain containing signaling pathway (GO:0070423)	8	1	0.32	+	3.1	0.3	1
bone marrow development (GO:0048539)	8	1	0.32	+	3.1	0.3	1
replication fork protection (GO:0048478)	8	1	0.32	+	3.1	0.3	1
synaptic vesicle recycling via endosome (GO:0036466)	8	1	0.32	+	3.1	0.3	1
regulation of modification of postsynaptic structure (GO:0099159)	8	1	0.32	+	3.1	0.3	1
negative regulation of smooth muscle cell differentiation (GO:0051151)	16	2	0.65	+	3.1	0.153	1
dorsal aorta morphogenesis (GO:0035912)	8	1	0.32	+	3.1	0.3	1
negative regulation of DNA damage response, signal transduction by p53 class mediator (GO:0043518)	16	2	0.65	+	3.1	0.153	1
negative regulation of defense response to virus (GO:0050687)	24	3	0.97	+	3.1	0.0856	1
protein poly-ADP-ribosylation (GO:0070212)	8	1	0.32	+	3.1	0.3	1
vesicle tethering (GO:0099022)	8	1	0.32	+	3.1	0.3	1
negative regulation of morphogenesis of an epithelium (GO:1905331)	8	1	0.32	+	3.1	0.3	1
negative regulation of mRNA 3'-end processing (GO:0031441)	8	1	0.32	+	3.1	0.3	1
regulation of electron transfer activity (GO:1904732)	8	1	0.32	+	3.1	0.3	1
negative regulation of mRNA polyadenylation (GO:1900364)	8	1	0.32	+	3.1	0.3	1
erythrocyte maturation (GO:0043249)	16	2	0.65	+	3.1	0.153	1
snRNA transcription by RNA polymerase III (GO:0042796)	8	1	0.32	+	3.1	0.3	1
positive regulation of developmental pigmentation (GO:0048087)	8	1	0.32	+	3.1	0.3	1
DNA damage response, detection of DNA damage (GO:0042769)	8	1	0.32	+	3.1	0.3	1
negative regulation of transcription by RNA polymerase I (GO:0016479)	8	1	0.32	+	3.1	0.3	1
diadenosine polyphosphate metabolic process (GO:0015959)	8	1	0.32	+	3.1	0.3	1
DNA dealkylation (GO:0035510)	16	2	0.65	+	3.1	0.153	1
RNA 3'-end processing (GO:0031123)	88	11	3.55	+	3.1	0.00159	0.126
pyrimidine deoxyribonucleotide biosynthetic process (GO:0009221)	8	1	0.32	+	3.1	0.3	1
regulation of Schwann cell migration (GO:1900147)	8	1	0.32	+	3.1	0.3	1
response to interferon-alpha (GO:0035455)	24	3	0.97	+	3.1	0.0856	1
DNA methylation involved in embryo development (GO:0043045)	8	1	0.32	+	3.1	0.3	1
deoxyribonucleoside metabolic process (GO:0009120)	8	1	0.32	+	3.1	0.3	1
protein localization to ciliary transition zone (GO:1904491)	8	1	0.32	+	3.1	0.3	1
regulation of mitochondrial gene expression (GO:0062125)	32	4	1.29	+	3.1	0.0497	1
negative regulation of macroautophagy (GO:0016242)	32	4	1.29	+	3.1	0.0497	1
regulation of skeletal muscle acetylcholine-gated channel clustering (GO:1904393)	8	1	0.32	+	3.1	0.3	1
positive regulation of cardiac epithelial to mesenchymal transition (GO:0062043)	8	1	0.32	+	3.1	0.3	1
glycoside catabolic process (GO:0016139)	8	1	0.32	+	3.1	0.3	1
positive regulation of oxidative phosphorylation (GO:1903862)	8	1	0.32	+	3.1	0.3	1
polyprenol metabolic process (GO:0016093)	8	1	0.32	+	3.1	0.3	1
cytoplasmic pattern recognition receptor signaling pathway in response to virus (GO:0039528)	8	1	0.32	+	3.1	0.3	1
cell communication by electrical coupling (GO:0010644)	8	1	0.32	+	3.1	0.3	1
mammalian oogenesis stage (GO:0022605)	8	1	0.32	+	3.1	0.3	1
negative regulation of mitochondrial fusion (GO:0010637)	8	1	0.32	+	3.1	0.3	1
pyrimidine nucleobase biosynthetic process (GO:0019856)	8	1	0.32	+	3.1	0.3	1
peptide cross-linking via chondroitin 4-sulfate glycosaminoglycan (GO:0019800)	8	1	0.32	+	3.1	0.3	1
regulation of viral entry into host cell (GO:0046596)	48	6	1.94	+	3.1	0.0178	0.608
blood vessel endothelial cell differentiation (GO:0060837)	8	1	0.32	+	3.1	0.3	1
negative regulation of phospholipase activity (GO:0010519)	8	1	0.32	+	3.1	0.3	1
release of sequestered calcium ion into cytosol by endoplasmic reticulum (GO:1903514)	8	1	0.32	+	3.1	0.3	1
mitochondrial fusion (GO:0008053)	16	2	0.65	+	3.1	0.153	1
positive regulation of dendritic cell cytokine production (GO:0002732)	8	1	0.32	+	3.1	0.3	1
protein K6-linked ubiquitination (GO:0085020)	8	1	0.32	+	3.1	0.3	1
cerebral cortex GABAergic interneuron development (GO:0021894)	8	1	0.32	+	3.1	0.3	1
tricuspid valve development (GO:0003175)	8	1	0.32	+	3.1	0.3	1
cell fate commitment involved in pattern specification (GO:0060581)	16	2	0.65	+	3.1	0.153	1
ventral spinal cord interneuron fate commitment (GO:0060579)	16	2	0.65	+	3.1	0.153	1
trachea cartilage development (GO:0060534)	8	1	0.32	+	3.1	0.3	1
mRNA processing (GO:0006397)	417	52	16.84	+	3.09	1.11e-11	3.38e-09
gene expression (GO:0010467)	1762	219	71.16	+	3.08	3.08e-48	2.43e-44
telomere maintenance (GO:0000723)	73	9	2.95	+	3.05	0.00447	0.264
ribonucleoprotein complex localization (GO:0071166)	65	8	2.63	+	3.05	0.00724	0.365
regulation of cell-substrate junction organization (GO:0150116)	65	8	2.63	+	3.05	0.00724	0.364
regulation of extrinsic apoptotic signaling pathway via death domain receptors (GO:1902041)	49	6	1.98	+	3.03	0.0194	0.644
transcription by RNA polymerase II (GO:0006366)	164	20	6.62	+	3.02	3.35e-05	0.00509
regulation of p38MAPK cascade (GO:1900744)	41	5	1.66	+	3.02	0.0321	0.827
nucleoside monophosphate metabolic process (GO:0009123)	41	5	1.66	+	3.02	0.0321	0.826
regulation of TORC1 signaling (GO:1903432)	41	5	1.66	+	3.02	0.0321	0.825
telomere organization (GO:0032200)	74	9	2.99	+	3.01	0.00485	0.279
cellular amide metabolic process (GO:0043603)	675	82	27.26	+	3.01	3.64e-17	1.47e-14
ribonucleoside monophosphate metabolic process (GO:0009161)	33	4	1.33	+	3	0.0541	1
regulation of protein export from nucleus (GO:0046825)	33	4	1.33	+	3	0.0541	1
trabecula formation (GO:0060343)	25	3	1.01	+	2.97	0.0932	1
folic acid-containing compound metabolic process (GO:0006760)	25	3	1.01	+	2.97	0.0932	1
cellular response to estradiol stimulus (GO:0071392)	25	3	1.01	+	2.97	0.0932	1
thymic T cell selection (GO:0045061)	25	3	1.01	+	2.97	0.0932	1
glycosyl compound catabolic process (GO:1901658)	25	3	1.01	+	2.97	0.0932	1
regulation of spindle assembly (GO:0090169)	25	3	1.01	+	2.97	0.0932	1
mRNA modification (GO:0016556)	25	3	1.01	+	2.97	0.0932	1
2'-deoxyribonucleotide metabolic process (GO:0009394)	25	3	1.01	+	2.97	0.0932	1
neuron projection regeneration (GO:0031102)	25	3	1.01	+	2.97	0.0932	1
nucleoside metabolic process (GO:0009116)	75	9	3.03	+	2.97	0.00525	0.298
positive regulation of protein processing (GO:0010954)	25	3	1.01	+	2.97	0.0932	1
centromere complex assembly (GO:0034508)	25	3	1.01	+	2.97	0.0932	1
negative regulation of receptor signaling pathway via JAK-STAT (GO:0046426)	25	3	1.01	+	2.97	0.0932	1
deoxyribose phosphate metabolic process (GO:0019692)	25	3	1.01	+	2.97	0.0932	1
mitotic metaphase plate congression (GO:0007080)	42	5	1.7	+	2.95	0.0349	0.866
negative regulation of DNA biosynthetic process (GO:2000279)	42	5	1.7	+	2.95	0.0349	0.865
erythrocyte development (GO:0048821)	42	5	1.7	+	2.95	0.0349	0.864
double-strand break repair via homologous recombination (GO:0000724)	93	11	3.76	+	2.93	0.00236	0.169
positive regulation of B cell differentiation (GO:0045579)	17	2	0.69	+	2.91	0.167	1
positive regulation of receptor recycling (GO:0001921)	17	2	0.69	+	2.91	0.167	1
negative regulation of glial cell proliferation (GO:0060253)	17	2	0.69	+	2.91	0.167	1
regulation of integrin-mediated signaling pathway (GO:2001044)	17	2	0.69	+	2.91	0.167	1
protein transmembrane import into intracellular organelle (GO:0044743)	34	4	1.37	+	2.91	0.0587	1
mRNA cleavage (GO:0006379)	17	2	0.69	+	2.91	0.167	1
regulation of protein deacetylation (GO:0090311)	51	6	2.06	+	2.91	0.0227	0.689
regulation of DNA-templated transcription, initiation (GO:2000142)	51	6	2.06	+	2.91	0.0227	0.687
synaptic vesicle transport along microtubule (GO:0099517)	17	2	0.69	+	2.91	0.167	1
synaptic vesicle cytoskeletal transport (GO:0099514)	17	2	0.69	+	2.91	0.167	1
regulation of postsynaptic density organization (GO:1905874)	17	2	0.69	+	2.91	0.167	1
negative regulation of multi-organism process (GO:0043901)	17	2	0.69	+	2.91	0.167	1
regulation of cell-cell adhesion mediated by cadherin (GO:2000047)	17	2	0.69	+	2.91	0.167	1
protein insertion into mitochondrial membrane (GO:0051204)	17	2	0.69	+	2.91	0.167	1
anterograde synaptic vesicle transport (GO:0048490)	17	2	0.69	+	2.91	0.167	1
chaperone-mediated protein complex assembly (GO:0051131)	17	2	0.69	+	2.91	0.167	1
positive regulation of actin nucleation (GO:0051127)	17	2	0.69	+	2.91	0.167	1
T cell apoptotic process (GO:0070231)	17	2	0.69	+	2.91	0.167	1
midbody abscission (GO:0061952)	17	2	0.69	+	2.91	0.167	1
axon regeneration (GO:0031103)	17	2	0.69	+	2.91	0.167	1
nucleoside catabolic process (GO:0009164)	17	2	0.69	+	2.91	0.167	1
translesion synthesis (GO:0019985)	17	2	0.69	+	2.91	0.167	1
response to antibiotic (GO:0046677)	34	4	1.37	+	2.91	0.0587	1
cell junction maintenance (GO:0034331)	34	4	1.37	+	2.91	0.0587	1
pulmonary valve morphogenesis (GO:0003184)	17	2	0.69	+	2.91	0.167	1
recombinational repair (GO:0000725)	94	11	3.8	+	2.9	0.00255	0.177
regulation of translational initiation (GO:0006446)	60	7	2.42	+	2.89	0.015	0.558
regulation of focal adhesion assembly (GO:0051893)	60	7	2.42	+	2.89	0.015	0.557
regulation of cell-substrate junction assembly (GO:0090109)	60	7	2.42	+	2.89	0.015	0.556
mitochondrion morphogenesis (GO:0070584)	26	3	1.05	+	2.86	0.101	1
negative regulation of receptor signaling pathway via STAT (GO:1904893)	26	3	1.05	+	2.86	0.101	1
hydrogen peroxide catabolic process (GO:0042744)	26	3	1.05	+	2.86	0.101	1
chaperone-mediated protein folding (GO:0061077)	52	6	2.1	+	2.86	0.0246	0.733
pyrimidine-containing compound metabolic process (GO:0072527)	52	6	2.1	+	2.86	0.0246	0.731
cellular nitrogen compound biosynthetic process (GO:0044271)	1075	124	43.41	+	2.86	6.66e-24	4.38e-21
nucleic acid metabolic process (GO:0090304)	1738	200	70.19	+	2.85	3.33e-39	1.75e-35
regulation of mitotic spindle organization (GO:0060236)	35	4	1.41	+	2.83	0.0635	1
regulation of intracellular estrogen receptor signaling pathway (GO:0033146)	35	4	1.41	+	2.83	0.0635	1
nucleobase metabolic process (GO:0009112)	35	4	1.41	+	2.83	0.0635	1
regulation of necrotic cell death (GO:0010939)	35	4	1.41	+	2.83	0.0635	1
cellular modified amino acid biosynthetic process (GO:0042398)	35	4	1.41	+	2.83	0.0635	1
positive regulation of Notch signaling pathway (GO:0045747)	44	5	1.78	+	2.81	0.0407	0.916
cellular response to amino acid starvation (GO:0034198)	44	5	1.78	+	2.81	0.0407	0.915
pigment biosynthetic process (GO:0046148)	44	5	1.78	+	2.81	0.0407	0.914
regulation of glial cell differentiation (GO:0045685)	88	10	3.55	+	2.81	0.00475	0.276
positive regulation of DNA-templated transcription, initiation (GO:2000144)	44	5	1.78	+	2.81	0.0407	0.913
modulation by symbiont of entry into host (GO:0052372)	53	6	2.14	+	2.8	0.0265	0.751
regulation of epidermis development (GO:0045682)	62	7	2.5	+	2.8	0.0174	0.599
DNA recombination (GO:0006310)	204	23	8.24	+	2.79	2.77e-05	0.00442
cellular macromolecule biosynthetic process (GO:0034645)	1154	130	46.61	+	2.79	3.24e-24	2.33e-21
regulation of telomere maintenance (GO:0032204)	80	9	3.23	+	2.79	0.00764	0.37
glycosyl compound metabolic process (GO:1901657)	98	11	3.96	+	2.78	0.00342	0.223
macromolecule biosynthetic process (GO:0009059)	1169	130	47.21	+	2.75	9.37e-24	5.92e-21
maintenance of DNA methylation (GO:0010216)	9	1	0.36	+	2.75	0.327	1
regulation of cardiac muscle hypertrophy in response to stress (GO:1903242)	9	1	0.36	+	2.75	0.327	1
positive regulation of AMPA receptor activity (GO:2000969)	9	1	0.36	+	2.75	0.327	1
negative regulation of neuroblast proliferation (GO:0007406)	9	1	0.36	+	2.75	0.327	1
positive regulation of cardiac muscle contraction (GO:0060452)	9	1	0.36	+	2.75	0.327	1
regulation of toll-like receptor 3 signaling pathway (GO:0034139)	9	1	0.36	+	2.75	0.327	1
chronic inflammatory response (GO:0002544)	9	1	0.36	+	2.75	0.327	1
positive regulation of monocyte differentiation (GO:0045657)	9	1	0.36	+	2.75	0.327	1
cardiac muscle cell myoblast differentiation (GO:0060379)	9	1	0.36	+	2.75	0.327	1
bone trabecula formation (GO:0060346)	9	1	0.36	+	2.75	0.327	1
tangential migration from the subventricular zone to the olfactory bulb (GO:0022028)	9	1	0.36	+	2.75	0.327	1
rhombomere development (GO:0021546)	9	1	0.36	+	2.75	0.327	1
ventral spinal cord interneuron differentiation (GO:0021514)	18	2	0.73	+	2.75	0.181	1
regulation of CD8-positive, alpha-beta T cell activation (GO:2001185)	18	2	0.73	+	2.75	0.181	1
positive regulation of phospholipid transport (GO:2001140)	9	1	0.36	+	2.75	0.327	1
inner cell mass cell proliferation (GO:0001833)	18	2	0.73	+	2.75	0.181	1
negative regulation of lipase activity (GO:0060192)	18	2	0.73	+	2.75	0.181	1
positive regulation of transcription elongation from RNA polymerase II promoter (GO:0032968)	18	2	0.73	+	2.75	0.181	1
collagen biosynthetic process (GO:0032964)	9	1	0.36	+	2.75	0.327	1
positive regulation of protein localization to synapse (GO:1902474)	9	1	0.36	+	2.75	0.327	1
neutrophil activation involved in immune response (GO:0002283)	9	1	0.36	+	2.75	0.327	1
regulation of chemokine (C-C motif) ligand 5 production (GO:0071649)	9	1	0.36	+	2.75	0.327	1
positive regulation of integrin-mediated signaling pathway (GO:2001046)	9	1	0.36	+	2.75	0.327	1
'de novo' protein folding (GO:0006458)	36	4	1.45	+	2.75	0.0685	1
regulation of translational elongation (GO:0006448)	18	2	0.73	+	2.75	0.181	1
NADPH oxidation (GO:0070995)	9	1	0.36	+	2.75	0.327	1
antiviral innate immune response (GO:0140374)	9	1	0.36	+	2.75	0.327	1
actin filament reorganization (GO:0090527)	9	1	0.36	+	2.75	0.327	1
regulation of lamellipodium morphogenesis (GO:2000392)	9	1	0.36	+	2.75	0.327	1
interleukin-2 production (GO:0032623)	9	1	0.36	+	2.75	0.327	1
cellular response to follicle-stimulating hormone stimulus (GO:0071372)	9	1	0.36	+	2.75	0.327	1
DNA modification (GO:0006304)	72	8	2.91	+	2.75	0.0123	0.514
pyrimidine nucleotide-sugar transmembrane transport (GO:0090481)	9	1	0.36	+	2.75	0.327	1
negative regulation of nitric oxide biosynthetic process (GO:0045019)	18	2	0.73	+	2.75	0.181	1
phosphorylation of RNA polymerase II C-terminal domain (GO:0070816)	9	1	0.36	+	2.75	0.327	1
relaxation of smooth muscle (GO:0044557)	9	1	0.36	+	2.75	0.327	1
neurotransmitter receptor transport, endosome to plasma membrane (GO:0099639)	9	1	0.36	+	2.75	0.327	1
response to salt (GO:1902074)	9	1	0.36	+	2.75	0.327	1
phosphatidylserine exposure on apoptotic cell surface (GO:0070782)	9	1	0.36	+	2.75	0.327	1
negative regulation of oxidative phosphorylation (GO:0090324)	9	1	0.36	+	2.75	0.327	1
negative regulation of intracellular protein transport (GO:0090317)	45	5	1.82	+	2.75	0.0438	0.958
regulation of branching morphogenesis of a nerve (GO:2000172)	9	1	0.36	+	2.75	0.327	1
modulation by symbiont of host programmed cell death (GO:0052040)	9	1	0.36	+	2.75	0.327	1
melanosome organization (GO:0032438)	18	2	0.73	+	2.75	0.181	1
regulation of glucocorticoid biosynthetic process (GO:0031946)	9	1	0.36	+	2.75	0.327	1
negative regulation of cell-cell adhesion mediated by cadherin (GO:2000048)	9	1	0.36	+	2.75	0.327	1
neurotransmitter receptor transport to postsynaptic membrane (GO:0098969)	18	2	0.73	+	2.75	0.181	1
neuron fate specification (GO:0048665)	36	4	1.45	+	2.75	0.0685	1
regulation of pigment cell differentiation (GO:0050932)	9	1	0.36	+	2.75	0.327	1
kinetochore organization (GO:0051383)	18	2	0.73	+	2.75	0.181	1
intestinal lipid absorption (GO:0098856)	9	1	0.36	+	2.75	0.327	1
modulation of inhibitory postsynaptic potential (GO:0098828)	9	1	0.36	+	2.75	0.327	1
regulation of transcription from RNA polymerase II promoter involved in heart development (GO:1901213)	9	1	0.36	+	2.75	0.327	1
voluntary musculoskeletal movement (GO:0050882)	9	1	0.36	+	2.75	0.327	1
progesterone receptor signaling pathway (GO:0050847)	9	1	0.36	+	2.75	0.327	1
cellular response to nutrient (GO:0031670)	18	2	0.73	+	2.75	0.181	1
regulation of G0 to G1 transition (GO:0070316)	9	1	0.36	+	2.75	0.327	1
regulation of deoxyribonuclease activity (GO:0032070)	9	1	0.36	+	2.75	0.327	1
hepoxilin biosynthetic process (GO:0051122)	9	1	0.36	+	2.75	0.327	1
hepoxilin metabolic process (GO:0051121)	9	1	0.36	+	2.75	0.327	1
histone H2A-K119 monoubiquitination (GO:0036353)	9	1	0.36	+	2.75	0.327	1
axial mesoderm development (GO:0048318)	9	1	0.36	+	2.75	0.327	1
protein deneddylation (GO:0000338)	9	1	0.36	+	2.75	0.327	1
'de novo' posttranslational protein folding (GO:0051084)	36	4	1.45	+	2.75	0.0685	1
peptidyl-lysine hydroxylation (GO:0017185)	9	1	0.36	+	2.75	0.327	1
positive regulation of mitochondrial translation (GO:0070131)	18	2	0.73	+	2.75	0.181	1
establishment or maintenance of cytoskeleton polarity (GO:0030952)	9	1	0.36	+	2.75	0.327	1
positive regulation of mitochondrial membrane permeability (GO:0035794)	18	2	0.73	+	2.75	0.181	1
enucleate erythrocyte differentiation (GO:0043353)	9	1	0.36	+	2.75	0.327	1
regulation of core promoter binding (GO:1904796)	9	1	0.36	+	2.75	0.327	1
regulation of protein localization to cell cortex (GO:1904776)	9	1	0.36	+	2.75	0.327	1
regulation of somatic stem cell population maintenance (GO:1904672)	9	1	0.36	+	2.75	0.327	1
positive regulation of ubiquitin protein ligase activity (GO:1904668)	9	1	0.36	+	2.75	0.327	1
positive regulation of NLRP3 inflammasome complex assembly (GO:1900227)	9	1	0.36	+	2.75	0.327	1
negative regulation of amyloid-beta clearance (GO:1900222)	9	1	0.36	+	2.75	0.327	1
mRNA transcription (GO:0009299)	18	2	0.73	+	2.75	0.181	1
monoubiquitinated protein deubiquitination (GO:0035520)	9	1	0.36	+	2.75	0.327	1
autocrine signaling (GO:0035425)	9	1	0.36	+	2.75	0.327	1
ubiquitin recycling (GO:0010992)	9	1	0.36	+	2.75	0.327	1
negative regulation of nitric oxide metabolic process (GO:1904406)	18	2	0.73	+	2.75	0.181	1
regulation of cardiac epithelial to mesenchymal transition (GO:0062042)	9	1	0.36	+	2.75	0.327	1
positive regulation of sequestering of triglyceride (GO:0010890)	9	1	0.36	+	2.75	0.327	1
necroptotic signaling pathway (GO:0097527)	9	1	0.36	+	2.75	0.327	1
sympathetic ganglion development (GO:0061549)	9	1	0.36	+	2.75	0.327	1
ammonium transport (GO:0015696)	9	1	0.36	+	2.75	0.327	1
ectopic germ cell programmed cell death (GO:0035234)	9	1	0.36	+	2.75	0.327	1
negative regulation of establishment of protein localization to mitochondrion (GO:1903748)	9	1	0.36	+	2.75	0.327	1
negative regulation of retrograde protein transport, ER to cytosol (GO:1904153)	9	1	0.36	+	2.75	0.327	1
inhibition of cysteine-type endopeptidase activity (GO:0097340)	9	1	0.36	+	2.75	0.327	1
germ cell migration (GO:0008354)	9	1	0.36	+	2.75	0.327	1
regulation of Schwann cell proliferation (GO:0010624)	9	1	0.36	+	2.75	0.327	1
CD40 signaling pathway (GO:0023035)	9	1	0.36	+	2.75	0.327	1
pericardium morphogenesis (GO:0003344)	9	1	0.36	+	2.75	0.327	1
negative regulation of immunoglobulin mediated immune response (GO:0002890)	9	1	0.36	+	2.75	0.327	1
very-low-density lipoprotein particle assembly (GO:0034379)	9	1	0.36	+	2.75	0.327	1
negative regulation of glial cell apoptotic process (GO:0034351)	9	1	0.36	+	2.75	0.327	1
adherens junction maintenance (GO:0034334)	9	1	0.36	+	2.75	0.327	1
regulation of antimicrobial humoral response (GO:0002759)	9	1	0.36	+	2.75	0.327	1
cytoplasmic pattern recognition receptor signaling pathway (GO:0002753)	18	2	0.73	+	2.75	0.181	1
negative regulation of B cell mediated immunity (GO:0002713)	9	1	0.36	+	2.75	0.327	1
regulation of NAD(P)H oxidase activity (GO:0033860)	9	1	0.36	+	2.75	0.327	1
olfactory bulb interneuron development (GO:0021891)	9	1	0.36	+	2.75	0.327	1
regulation of oxidative stress-induced neuron intrinsic apoptotic signaling pathway (GO:1903376)	9	1	0.36	+	2.75	0.327	1
regulation of vascular wound healing (GO:0061043)	9	1	0.36	+	2.75	0.327	1
regulation of transcription elongation from RNA polymerase II promoter (GO:0034243)	36	4	1.45	+	2.75	0.0685	1
signal transduction involved in DNA damage checkpoint (GO:0072422)	27	3	1.09	+	2.75	0.109	1
signal transduction involved in DNA integrity checkpoint (GO:0072401)	27	3	1.09	+	2.75	0.109	1
signal transduction involved in cell cycle checkpoint (GO:0072395)	27	3	1.09	+	2.75	0.109	1
porphyrin-containing compound biosynthetic process (GO:0006779)	27	3	1.09	+	2.75	0.109	1
positive regulation of syncytium formation by plasma membrane fusion (GO:0060143)	27	3	1.09	+	2.75	0.109	1
tetrapyrrole biosynthetic process (GO:0033014)	27	3	1.09	+	2.75	0.109	1
cellular senescence (GO:0090398)	27	3	1.09	+	2.75	0.109	1
metaphase plate congression (GO:0051310)	54	6	2.18	+	2.75	0.0285	0.763
regulation of DNA methylation (GO:0044030)	27	3	1.09	+	2.75	0.109	1
purine nucleoside metabolic process (GO:0042278)	54	6	2.18	+	2.75	0.0285	0.762
cellular protein-containing complex localization (GO:0034629)	27	3	1.09	+	2.75	0.109	1
labyrinthine layer morphogenesis (GO:0060713)	27	3	1.09	+	2.75	0.109	1
diol metabolic process (GO:0034311)	27	3	1.09	+	2.75	0.109	1
positive regulation of dendritic spine morphogenesis (GO:0061003)	27	3	1.09	+	2.75	0.109	1
positive regulation of protein maturation (GO:1903319)	27	3	1.09	+	2.75	0.109	1
nucleobase-containing compound transport (GO:0015931)	181	20	7.31	+	2.74	0.000116	0.015
cell cycle arrest (GO:0007050)	91	10	3.68	+	2.72	0.00587	0.311
cellular response to leukemia inhibitory factor (GO:1990830)	128	14	5.17	+	2.71	0.00128	0.109
ribonucleoprotein complex export from nucleus (GO:0071426)	64	7	2.58	+	2.71	0.0201	0.658
regulation of protein targeting (GO:1903533)	55	6	2.22	+	2.7	0.0306	0.811
response to leukemia inhibitory factor (GO:1990823)	129	14	5.21	+	2.69	0.00137	0.115
cellular nitrogen compound metabolic process (GO:0034641)	2769	300	111.83	+	2.68	1.06e-56	1.67e-52
spinal cord motor neuron differentiation (GO:0021522)	37	4	1.49	+	2.68	0.0736	1
positive regulation of DNA biosynthetic process (GO:2000573)	74	8	2.99	+	2.68	0.0142	0.54
RNA export from nucleus (GO:0006405)	74	8	2.99	+	2.68	0.0142	0.539
mitochondrial RNA metabolic process (GO:0000959)	37	4	1.49	+	2.68	0.0736	1
DNA geometric change (GO:0032392)	37	4	1.49	+	2.68	0.0736	1
RNA destabilization (GO:0050779)	37	4	1.49	+	2.68	0.0736	1
aspartate family amino acid metabolic process (GO:0009066)	37	4	1.49	+	2.68	0.0736	1
response to ischemia (GO:0002931)	37	4	1.49	+	2.68	0.0736	1
regulation of humoral immune response (GO:0002920)	37	4	1.49	+	2.68	0.0736	1
cell redox homeostasis (GO:0045454)	65	7	2.63	+	2.67	0.0215	0.674
dopamine receptor signaling pathway (GO:0007212)	28	3	1.13	+	2.65	0.118	1
regulation of hematopoietic progenitor cell differentiation (GO:1901532)	28	3	1.13	+	2.65	0.118	1
positive regulation of calcium ion import (GO:0090280)	28	3	1.13	+	2.65	0.118	1
positive regulation of p38MAPK cascade (GO:1900745)	28	3	1.13	+	2.65	0.118	1
focal adhesion assembly (GO:0048041)	28	3	1.13	+	2.65	0.118	1
actin filament polymerization (GO:0030041)	28	3	1.13	+	2.65	0.118	1
cerebral cortex neuron differentiation (GO:0021895)	28	3	1.13	+	2.65	0.118	1
T cell differentiation in thymus (GO:0033077)	66	7	2.67	+	2.63	0.023	0.693
protein localization to chromosome (GO:0034502)	66	7	2.67	+	2.63	0.023	0.692
cellular protein-containing complex assembly (GO:0034622)	671	71	27.1	+	2.62	2.51e-12	7.94e-10
nucleobase-containing compound catabolic process (GO:0034655)	237	25	9.57	+	2.61	3.49e-05	0.00525
olfactory bulb development (GO:0021772)	38	4	1.53	+	2.61	0.079	1
stress granule assembly (GO:0034063)	19	2	0.77	+	2.61	0.195	1
response to amphetamine (GO:0001975)	19	2	0.77	+	2.61	0.195	1
regulation of cytoplasmic translation (GO:2000765)	19	2	0.77	+	2.61	0.195	1
cell-substrate junction assembly (GO:0007044)	38	4	1.53	+	2.61	0.079	1
Sertoli cell development (GO:0060009)	19	2	0.77	+	2.61	0.195	1
hematopoietic stem cell proliferation (GO:0071425)	19	2	0.77	+	2.61	0.195	1
positive regulation of myoblast fusion (GO:1901741)	19	2	0.77	+	2.61	0.195	1
oxidative demethylation (GO:0070989)	19	2	0.77	+	2.61	0.195	1
positive regulation of intracellular steroid hormone receptor signaling pathway (GO:0033145)	19	2	0.77	+	2.61	0.195	1
DNA-templated transcription, termination (GO:0006353)	19	2	0.77	+	2.61	0.195	1
pigment granule organization (GO:0048753)	19	2	0.77	+	2.61	0.195	1
negative regulation of astrocyte differentiation (GO:0048712)	19	2	0.77	+	2.61	0.195	1
negative regulation of telomere maintenance via telomerase (GO:0032211)	19	2	0.77	+	2.61	0.195	1
neurotransmitter receptor transport to plasma membrane (GO:0098877)	19	2	0.77	+	2.61	0.195	1
amine biosynthetic process (GO:0009309)	19	2	0.77	+	2.61	0.195	1
regulation of execution phase of apoptosis (GO:1900117)	19	2	0.77	+	2.61	0.195	1
peptidyl-tyrosine dephosphorylation (GO:0035335)	38	4	1.53	+	2.61	0.079	1
cellular biogenic amine biosynthetic process (GO:0042401)	19	2	0.77	+	2.61	0.195	1
regulation of mitochondrion organization (GO:0010821)	133	14	5.37	+	2.61	0.00179	0.136
nucleobase-containing small molecule catabolic process (GO:0034656)	19	2	0.77	+	2.61	0.195	1
platelet formation (GO:0030220)	19	2	0.77	+	2.61	0.195	1
regulation of Rac protein signal transduction (GO:0035020)	19	2	0.77	+	2.61	0.195	1
establishment of protein localization to postsynaptic membrane (GO:1903540)	19	2	0.77	+	2.61	0.195	1
trophoblast giant cell differentiation (GO:0060707)	19	2	0.77	+	2.61	0.195	1
cardiac right ventricle morphogenesis (GO:0003215)	19	2	0.77	+	2.61	0.195	1
protein deubiquitination (GO:0016579)	105	11	4.24	+	2.59	0.00549	0.299
regulation of membrane permeability (GO:0090559)	67	7	2.71	+	2.59	0.0246	0.731
response to amino acid starvation (GO:1990928)	48	5	1.94	+	2.58	0.0541	1
nucleobase-containing compound metabolic process (GO:0006139)	2162	225	87.31	+	2.58	4.06e-38	1.6e-34
cell differentiation in spinal cord (GO:0021515)	58	6	2.34	+	2.56	0.0375	0.876
regulation of stem cell differentiation (GO:2000736)	58	6	2.34	+	2.56	0.0375	0.874
positive regulation of protein deacetylation (GO:0090312)	29	3	1.17	+	2.56	0.126	1
protein hydroxylation (GO:0018126)	29	3	1.17	+	2.56	0.126	1
negative regulation of antigen receptor-mediated signaling pathway (GO:0050858)	29	3	1.17	+	2.56	0.126	1
signal transduction in response to DNA damage (GO:0042770)	58	6	2.34	+	2.56	0.0375	0.873
response to interferon-beta (GO:0035456)	58	6	2.34	+	2.56	0.0375	0.872
programmed necrotic cell death (GO:0097300)	29	3	1.17	+	2.56	0.126	1
mitochondrial transport (GO:0006839)	184	19	7.43	+	2.56	0.000373	0.0393
regulation of spindle organization (GO:0090224)	39	4	1.58	+	2.54	0.0846	1
negative regulation of NF-kappaB transcription factor activity (GO:0032088)	78	8	3.15	+	2.54	0.0185	0.627
positive regulation of substrate adhesion-dependent cell spreading (GO:1900026)	39	4	1.58	+	2.54	0.0846	1
cell-substrate junction organization (GO:0150115)	39	4	1.58	+	2.54	0.0846	1
regulation of cell aging (GO:0090342)	49	5	1.98	+	2.53	0.0578	1
regulation of oligodendrocyte differentiation (GO:0048713)	49	5	1.98	+	2.53	0.0578	1
histone acetylation (GO:0016573)	98	10	3.96	+	2.53	0.0093	0.421
establishment of protein localization to plasma membrane (GO:0061951)	49	5	1.98	+	2.53	0.0578	1
regulation of DNA biosynthetic process (GO:2000278)	118	12	4.77	+	2.52	0.00475	0.275
positive regulation of protein localization to cell periphery (GO:1904377)	69	7	2.79	+	2.51	0.028	0.755
cellular response to acid chemical (GO:0071229)	79	8	3.19	+	2.51	0.0197	0.65
heterocycle metabolic process (GO:0046483)	2301	233	92.93	+	2.51	6.54e-38	2.06e-34
regulation of gliogenesis (GO:0014013)	119	12	4.81	+	2.5	0.00505	0.288
positive regulation of tolerance induction (GO:0002645)	10	1	0.4	+	2.48	0.353	1
regulation of germinal center formation (GO:0002634)	10	1	0.4	+	2.48	0.353	1
bronchus development (GO:0060433)	10	1	0.4	+	2.48	0.353	1
positive regulation of cell cycle G2/M phase transition (GO:1902751)	30	3	1.21	+	2.48	0.135	1
purine ribonucleoside biosynthetic process (GO:0046129)	20	2	0.81	+	2.48	0.21	1
positive regulation of glial cell differentiation (GO:0045687)	50	5	2.02	+	2.48	0.0616	1
hexose catabolic process (GO:0019320)	20	2	0.81	+	2.48	0.21	1
facial nerve structural organization (GO:0021612)	10	1	0.4	+	2.48	0.353	1
chaperone-mediated protein transport (GO:0072321)	10	1	0.4	+	2.48	0.353	1
regulation of receptor localization to synapse (GO:1902683)	20	2	0.81	+	2.48	0.21	1
DNA biosynthetic process (GO:0071897)	60	6	2.42	+	2.48	0.0426	0.937
regulation of regulatory T cell differentiation (GO:0045589)	30	3	1.21	+	2.48	0.135	1
fatty acid beta-oxidation using acyl-CoA dehydrogenase (GO:0033539)	10	1	0.4	+	2.48	0.353	1
floor plate development (GO:0033504)	10	1	0.4	+	2.48	0.353	1
positive regulation of cellular senescence (GO:2000774)	10	1	0.4	+	2.48	0.353	1
positive regulation of cytoplasmic translation (GO:2000767)	10	1	0.4	+	2.48	0.353	1
marginal zone B cell differentiation (GO:0002315)	10	1	0.4	+	2.48	0.353	1
regulation of phospholipid transport (GO:2001138)	10	1	0.4	+	2.48	0.353	1
positive regulation of gene silencing by miRNA (GO:2000637)	30	3	1.21	+	2.48	0.135	1
regulation of mRNA binding (GO:1902415)	10	1	0.4	+	2.48	0.353	1
NLS-bearing protein import into nucleus (GO:0006607)	10	1	0.4	+	2.48	0.353	1
mitochondrial membrane organization (GO:0007006)	100	10	4.04	+	2.48	0.0105	0.459
distal tubule development (GO:0072017)	10	1	0.4	+	2.48	0.353	1
cell-cell junction maintenance (GO:0045217)	20	2	0.81	+	2.48	0.21	1
meiotic cytokinesis (GO:0033206)	10	1	0.4	+	2.48	0.353	1
regulation of translational fidelity (GO:0006450)	10	1	0.4	+	2.48	0.353	1
protein localization to chromosome, centromeric region (GO:0071459)	20	2	0.81	+	2.48	0.21	1
translational elongation (GO:0006414)	30	3	1.21	+	2.48	0.135	1
regulation of synapse structural plasticity (GO:0051823)	10	1	0.4	+	2.48	0.353	1
glycogen catabolic process (GO:0005980)	10	1	0.4	+	2.48	0.353	1
regulation of glucokinase activity (GO:0033131)	10	1	0.4	+	2.48	0.353	1
tRNA splicing, via endonucleolytic cleavage and ligation (GO:0006388)	10	1	0.4	+	2.48	0.353	1
protein prenylation (GO:0018342)	10	1	0.4	+	2.48	0.353	1
negative regulation of T cell differentiation in thymus (GO:0033085)	10	1	0.4	+	2.48	0.353	1
negative regulation of protein exit from endoplasmic reticulum (GO:0070862)	10	1	0.4	+	2.48	0.353	1
transcription-coupled nucleotide-excision repair (GO:0006283)	10	1	0.4	+	2.48	0.353	1
cellular response to leucine (GO:0071233)	10	1	0.4	+	2.48	0.353	1
positive regulation of DNA methylation-dependent heterochromatin assembly (GO:0090309)	10	1	0.4	+	2.48	0.353	1
spindle assembly involved in meiosis (GO:0090306)	10	1	0.4	+	2.48	0.353	1
Rap protein signal transduction (GO:0032486)	10	1	0.4	+	2.48	0.353	1
regulation of growth rate (GO:0040009)	10	1	0.4	+	2.48	0.353	1
response to follicle-stimulating hormone (GO:0032354)	10	1	0.4	+	2.48	0.353	1
peptidyl-lysine monomethylation (GO:0018026)	10	1	0.4	+	2.48	0.353	1
N-acetylneuraminate metabolic process (GO:0006054)	10	1	0.4	+	2.48	0.353	1
negative regulation of collateral sprouting (GO:0048671)	10	1	0.4	+	2.48	0.353	1
detection of temperature stimulus involved in sensory perception of pain (GO:0050965)	20	2	0.81	+	2.48	0.21	1
protein K63-linked deubiquitination (GO:0070536)	30	3	1.21	+	2.48	0.135	1
regulation of cellular response to osmotic stress (GO:0106049)	10	1	0.4	+	2.48	0.353	1
regulation of calcium ion import across plasma membrane (GO:1905664)	10	1	0.4	+	2.48	0.353	1
cellular response to leucine starvation (GO:1990253)	10	1	0.4	+	2.48	0.353	1
relaxation of muscle (GO:0090075)	20	2	0.81	+	2.48	0.21	1
primitive streak formation (GO:0090009)	10	1	0.4	+	2.48	0.353	1
regulation of lipopolysaccharide-mediated signaling pathway (GO:0031664)	20	2	0.81	+	2.48	0.21	1
hepatocyte differentiation (GO:0070365)	10	1	0.4	+	2.48	0.353	1
dorsal aorta development (GO:0035907)	10	1	0.4	+	2.48	0.353	1
UV protection (GO:0009650)	10	1	0.4	+	2.48	0.353	1
platelet morphogenesis (GO:0036344)	20	2	0.81	+	2.48	0.21	1
negative regulation of nitric-oxide synthase activity (GO:0051001)	10	1	0.4	+	2.48	0.353	1
positive regulation of establishment of protein localization to telomere (GO:1904851)	10	1	0.4	+	2.48	0.353	1
endothelial cell chemotaxis (GO:0035767)	10	1	0.4	+	2.48	0.353	1
positive regulation of granulocyte differentiation (GO:0030854)	10	1	0.4	+	2.48	0.353	1
negative regulation of granulocyte differentiation (GO:0030853)	10	1	0.4	+	2.48	0.353	1
anoikis (GO:0043276)	10	1	0.4	+	2.48	0.353	1
response to leucine (GO:0043201)	10	1	0.4	+	2.48	0.353	1
protein localization to endosome (GO:0036010)	10	1	0.4	+	2.48	0.353	1
urea cycle (GO:0000050)	10	1	0.4	+	2.48	0.353	1
sequestering of extracellular ligand from receptor (GO:0035581)	10	1	0.4	+	2.48	0.353	1
negative regulation of chromatin binding (GO:0035562)	10	1	0.4	+	2.48	0.353	1
regulation of SNARE complex assembly (GO:0035542)	10	1	0.4	+	2.48	0.353	1
rRNA methylation (GO:0031167)	20	2	0.81	+	2.48	0.21	1
coenzyme A biosynthetic process (GO:0015937)	10	1	0.4	+	2.48	0.353	1
2'-deoxyribonucleotide biosynthetic process (GO:0009265)	10	1	0.4	+	2.48	0.353	1
glucan catabolic process (GO:0009251)	10	1	0.4	+	2.48	0.353	1
regulation of microtubule binding (GO:1904526)	10	1	0.4	+	2.48	0.353	1
positive regulation of receptor binding (GO:1900122)	10	1	0.4	+	2.48	0.353	1
positive regulation of execution phase of apoptosis (GO:1900119)	10	1	0.4	+	2.48	0.353	1
negative regulation of execution phase of apoptosis (GO:1900118)	10	1	0.4	+	2.48	0.353	1
purine ribonucleoside monophosphate biosynthetic process (GO:0009168)	20	2	0.81	+	2.48	0.21	1
nucleoside biosynthetic process (GO:0009163)	20	2	0.81	+	2.48	0.21	1
purine nucleoside monophosphate biosynthetic process (GO:0009127)	20	2	0.81	+	2.48	0.21	1
negative regulation of lipoprotein particle clearance (GO:0010985)	10	1	0.4	+	2.48	0.353	1
regulation of lipoprotein particle clearance (GO:0010984)	20	2	0.81	+	2.48	0.21	1
negative regulation of cellular response to hypoxia (GO:1900038)	10	1	0.4	+	2.48	0.353	1
intrinsic apoptotic signaling pathway in response to oxidative stress (GO:0008631)	20	2	0.81	+	2.48	0.21	1
glycolytic process through glucose-6-phosphate (GO:0061620)	10	1	0.4	+	2.48	0.353	1
nucleotide-sugar transmembrane transport (GO:0015780)	10	1	0.4	+	2.48	0.353	1
regulation of receptor clustering (GO:1903909)	20	2	0.81	+	2.48	0.21	1
ribonucleoside biosynthetic process (GO:0042455)	20	2	0.81	+	2.48	0.21	1
purine nucleoside biosynthetic process (GO:0042451)	20	2	0.81	+	2.48	0.21	1
negative regulation of fibroblast migration (GO:0010764)	10	1	0.4	+	2.48	0.353	1
regulation of intestinal cholesterol absorption (GO:0030300)	10	1	0.4	+	2.48	0.353	1
negative regulation of viral-induced cytoplasmic pattern recognition receptor signaling pathway (GO:0039532)	10	1	0.4	+	2.48	0.353	1
regulation of plasma membrane organization (GO:1903729)	10	1	0.4	+	2.48	0.353	1
ncRNA catabolic process (GO:0034661)	30	3	1.21	+	2.48	0.135	1
regulation of adipose tissue development (GO:1904177)	10	1	0.4	+	2.48	0.353	1
prenylation (GO:0097354)	10	1	0.4	+	2.48	0.353	1
mitochondrial outer membrane permeabilization (GO:0097345)	10	1	0.4	+	2.48	0.353	1
zymogen inhibition (GO:0097341)	10	1	0.4	+	2.48	0.353	1
regulation of cardiac muscle adaptation (GO:0010612)	10	1	0.4	+	2.48	0.353	1
cell surface receptor signaling pathway involved in heart development (GO:0061311)	20	2	0.81	+	2.48	0.21	1
cardiac neural crest cell development involved in heart development (GO:0061308)	10	1	0.4	+	2.48	0.353	1
intracellular mRNA localization (GO:0008298)	10	1	0.4	+	2.48	0.353	1
type B pancreatic cell differentiation (GO:0003309)	20	2	0.81	+	2.48	0.21	1
chorio-allantoic fusion (GO:0060710)	10	1	0.4	+	2.48	0.353	1
negative regulation of cell maturation (GO:1903430)	10	1	0.4	+	2.48	0.353	1
urea metabolic process (GO:0019627)	10	1	0.4	+	2.48	0.353	1
deoxyribose phosphate biosynthetic process (GO:0046385)	10	1	0.4	+	2.48	0.353	1
protein-DNA complex assembly (GO:0065004)	131	13	5.29	+	2.46	0.00408	0.255
regulation of mitochondrial membrane potential (GO:0051881)	81	8	3.27	+	2.45	0.0223	0.689
myeloid cell development (GO:0061515)	71	7	2.87	+	2.44	0.0317	0.818
cellular aromatic compound metabolic process (GO:0006725)	2376	234	95.96	+	2.44	2.27e-36	5.12e-33
modulation by host of symbiont process (GO:0051851)	61	6	2.46	+	2.44	0.0454	0.951
actin filament bundle assembly (GO:0051017)	61	6	2.46	+	2.44	0.0454	0.95
protein-DNA complex subunit organization (GO:0071824)	173	17	6.99	+	2.43	0.00175	0.134
intrinsic apoptotic signaling pathway by p53 class mediator (GO:0072332)	51	5	2.06	+	2.43	0.0656	1
regulation of ubiquitin-protein transferase activity (GO:0051438)	51	5	2.06	+	2.43	0.0656	1
protein export from nucleus (GO:0006611)	92	9	3.72	+	2.42	0.0167	0.587
negative regulation of response to biotic stimulus (GO:0002832)	92	9	3.72	+	2.42	0.0167	0.586
RNA biosynthetic process (GO:0032774)	307	30	12.4	+	2.42	2.45e-05	0.00416
non-recombinational repair (GO:0000726)	41	4	1.66	+	2.42	0.0962	1
negative regulation of DNA-binding transcription factor activity (GO:0043433)	164	16	6.62	+	2.42	0.00258	0.178
olfactory lobe development (GO:0021988)	41	4	1.66	+	2.42	0.0962	1
positive regulation of protein localization to plasma membrane (GO:1903078)	62	6	2.5	+	2.4	0.0482	0.987
positive regulation of posttranscriptional gene silencing (GO:0060148)	31	3	1.25	+	2.4	0.144	1
regulation of viral release from host cell (GO:1902186)	31	3	1.25	+	2.4	0.144	1
DNA duplex unwinding (GO:0032508)	31	3	1.25	+	2.4	0.144	1
negative regulation of calcium ion transmembrane transporter activity (GO:1901020)	31	3	1.25	+	2.4	0.144	1
DNA damage response, signal transduction by p53 class mediator (GO:0030330)	31	3	1.25	+	2.4	0.144	1
heme metabolic process (GO:0042168)	31	3	1.25	+	2.4	0.144	1
protein localization to cell surface (GO:0034394)	31	3	1.25	+	2.4	0.144	1
protein import (GO:0017038)	145	14	5.86	+	2.39	0.00549	0.3
transcription, DNA-templated (GO:0006351)	301	29	12.16	+	2.39	4.17e-05	0.00603
internal protein amino acid acetylation (GO:0006475)	104	10	4.2	+	2.38	0.0133	0.535
internal peptidyl-lysine acetylation (GO:0018393)	104	10	4.2	+	2.38	0.0133	0.533
[truncated: 13,784 more rows]
